1  
2  
3  
4  
5  
6  
7  
8  
9  
10  
11  
12  
13  
14  
15  
16  
17  
18  
19  
20  
21  
22  
23  
24  
25  
26  
27  
28  
29  
30  
31  
32

## Unravelling the genetic architecture of musical rhythm

**Maria Niarchou<sup>1,2\*</sup>, J. Fah Sathirapongsasuti<sup>3</sup>, Nori Jacoby<sup>4,5</sup>,  
Eamonn Bell<sup>6</sup>, Evonne McArthur<sup>2</sup>, Peter Straub<sup>2</sup>, The 23andMe Research Team<sup>3^</sup>,  
J. Devin McAuley<sup>7</sup>, John A. Capra<sup>8,9,10,2</sup>, Fredrik Ullén<sup>11</sup>, Nicole Creanza<sup>8</sup>,  
Miriam A. Mosing<sup>11,12</sup>, David Hinds<sup>3</sup>, Lea K. Davis<sup>2,13,10,14,15\*†</sup>,  
Reyna L. Gordon<sup>16,17,2\*†</sup>**

<sup>1</sup>Division of Psychological Medicine and Clinical Neurosciences, Cardiff University, UK

<sup>2</sup>Vanderbilt Genetics Institute, Vanderbilt University Medical Center, TN, USA

<sup>3</sup>23andMe, Inc., Sunnyvale, CA, USA

<sup>4</sup>Computational Auditory Perception Research Group, Max Planck Institute for Empirical Aesthetics, Germany

<sup>5</sup>Center for Science and Society, Columbia University, USA

<sup>6</sup>Music Department, Columbia University, USA

<sup>7</sup>Department of Psychology, Michigan State University, Michigan, USA

<sup>8</sup>Department of Biological Sciences, Vanderbilt University, TN, USA

<sup>9</sup>Department of Computer Science, Vanderbilt University, TN, USA

<sup>10</sup>Department of Biomedical Informatics, Vanderbilt University Medical Center, TN, USA

<sup>11</sup>Department of Neuroscience, Karolinska Institutet, Sweden

<sup>12</sup>Department of Medical Epidemiology and Biostatistics, Karolinska Institutet, Sweden

<sup>13</sup>Division of Genetic Medicine, Department of Medicine, Vanderbilt University Medical Center, TN, USA

<sup>14</sup>Department of Psychiatry and Behavioral Sciences, Vanderbilt University Medical Center, TN, USA

<sup>15</sup>Department of Molecular Physiology and Biophysics, Vanderbilt University, TN, USA

<sup>16</sup>Department of Otolaryngology, Vanderbilt University Medical Center, TN, USA

<sup>17</sup>Department of Psychology, Vanderbilt University, TN, USA

<sup>^</sup>full list of authors in Supplementary Note

<sup>\*</sup>Correspondence to: Reyna L. Gordon ([reyna.gordon@Vanderbilt.Edu](mailto:reyna.gordon@Vanderbilt.Edu)), Lea Davis ([lea.k.davis@gmail.com](mailto:lea.k.davis@gmail.com)), Maria Niarchou ([maria.niarchou@vumc.org](mailto:maria.niarchou@vumc.org))

<sup>†</sup>Joint supervision

33  
34  
35  
36  
37  
38  
39  
40  
41  
42  
43  
44  
45  
46  
47  
48  
49  
50

## Abstract

While timing and rhythm-related phenotypes are heritable, the human genome variations underlying these traits are not yet well-understood. We conducted a genome-wide association study to identify common genetic variants associated with a self-reported musical rhythm phenotype in 606,825 individuals. Rhythm exhibited a highly polygenic architecture with sixty-eight loci reaching genome-wide significance ( $p < 5 \times 10^{-8}$ ) and SNP-based heritability of 13%-16%. Polygenic scores for rhythm predicted the presence of musician-related keywords in the BioVU electronic health record biobank. Genetic associations with rhythm were enriched for genes expressed in brain tissues. Genetic correlation analyses revealed shared genetic architecture with several traits relevant to cognition, emotion, health, and circadian rhythms, paving the way to a better understanding of the neurobiological pathways of musicality.

51 **Introduction**

52 Rhythm is a fundamental aspect of music across cultures <sup>1,2</sup> and more broadly,  
53 rhythmic patterns provide sensori-motor structure to human interactions. Our tendency  
54 to perceive, create, manipulate, and appreciate rhythms in a variety of contexts (e.g.,  
55 speech, music, movement) is part of what makes us human. Even very young children  
56 are sensitive to the social and linguistic signals carried by rhythm <sup>3</sup>, thus it is not  
57 surprising that parents use rhythmic vocalizations and synchronous movement (e.g.,  
58 lullabies and rocking) to interact with their infants from birth <sup>4</sup>. Moving in synchrony to a  
59 musical beat (“beat synchronization”) appears to be a key feature of human musical  
60 experiences throughout the lifespan <sup>5-7</sup>.

61 Although most people are able to effortlessly detect and synchronize with the  
62 beat even without musical training <sup>6,7</sup>, there is substantial inter-individual variability  
63 (within cultures) in the extent to which individuals can perceive and produce musical  
64 rhythm accurately <sup>8-10</sup>. While the neuroimaging literature points to auditory-motor  
65 networks in the brain underlying rhythm perception and production <sup>11</sup>, less is known  
66 about the genetic underpinnings that give rise to individual differences in these  
67 networks. Heritability estimates from family-based studies, using a variety of measures  
68 relevant for rhythmic ability, range from 21% <sup>12</sup> to 50% <sup>13</sup>. There is a gap in knowledge  
69 about genomic loci underlying variation in rhythm ability <sup>14</sup>, in part due to the challenge  
70 of assessing the rhythm phenotype in a sample large enough to provide sufficient power  
71 to detect common variants with small effects, as expected for complex traits <sup>15</sup>.

72 *Summary of Approach.*

73           We conducted a genome-wide association study (GWAS) to identify common  
74 genetic variants associated with a self-reported musical rhythm phenotype, i.e. “Can  
75 you clap in time with a musical beat?”, collected from 606,825 individuals participating in  
76 research with the personal genetics company 23andMe, Inc. We then validated this self-  
77 reported phenotype in a separate internet-based behavioural study conducted in 724  
78 individuals and found that it was significantly correlated with rhythm perception (Online  
79 Methods). In the GWAS, a total of 68 independent SNPs surpassed the threshold for  
80 genome-wide significance ( $p < 5 \times 10^{-08}$ ). In addition to determining which genes were  
81 implicated by these variants, we estimated how much of the total phenotypic variance  
82 could be explained by all variation across the genome (i.e., SNP-based heritability). We  
83 then further explored this heritability to test the hypothesis that variants associated with  
84 rhythm were enriched among genes expressed in brain compared to genes expressed  
85 in other tissues (e.g., muscle, adipose, etc.), and furthermore enriched in genes  
86 expressed in neurons compared to other brain cell types (e.g., oligodendrocyte,  
87 astrocyte).

88           Using an independent sample of 67,441 genotyped individuals from the  
89 Vanderbilt University Medical Center biobank, BioVU, we tested whether a cumulative  
90 sum of the genetic effects for rhythm detected in our GWAS (i.e., rhythm polygenic  
91 score), was significantly associated with an indication of musician status in the  
92 electronic health record (EHR). Because little is yet known about the relationship of the  
93 genomics of rhythm to other traits, we also performed exploratory genetic correlation  
94 analysis including 764 complex traits for which a well-powered GWAS has been  
95 performed and deposited in LDHub<sup>16</sup>. Finally, we evaluated the contribution to rhythm

96 of regions of the genome that have experienced significant human-specific evolutionary  
97 shifts (since the divergence of humans and chimpanzees from their last common  
98 ancestor, ~6 million years ago).

## 99 **Results**

### 100 **Validating the self-reported rhythm phenotype**

101

102 The study population is N=606,825 participants of European ancestry (59% females,  
103 mean age(SD)=52.09(18.5) years, who consented to participate in research with  
104 23andMe, Inc. Data were available from individuals who answered the question “Can  
105 you clap in time with a musical beat?” The majority of participants answered ‘Yes’  
106 (91.57%) and 8.43% answered ‘No’, which is slightly higher than the estimated  
107 population prevalence of poor rhythm at ~5%<sup>17,18</sup> (Table 1 and Supplementary Note). In  
108 light of prior work suggesting that human rhythm is a complex trait that can be quantified  
109 with both objective and self-report measures<sup>10</sup>, we sought to validate the self-report  
110 question against an objective measure of rhythm perception. We conducted a  
111 phenotype validation study with a sample (N=724; mean age=36 years, SD=10.9; 46%  
112 females) recruited anonymously from Amazon’s Mechanical Turk. Participants  
113 performed an objective musical rhythm perception test and were asked “Can you clap in  
114 time with a musical beat?” (details provided in Online Methods). In each of the 32 trials,  
115 participants had to judge whether a pair of rhythms were the same or different, following  
116 a standard procedure for assessing individual differences in musical perception ability<sup>9</sup>  
117 and utilizing rhythm sequences with simple (highly metrical) and complex (syncopated)  
118 rhythms<sup>19</sup>. Individuals who had better performance on discriminating musical rhythms  
119 were more likely to answer ‘Yes’ to the self-report synchronization question than those  
120 who answered ‘No’ (OR(95%CI)=1.94(1.28 to 3.01), p=0.002, McFadden’s R<sup>2</sup>=0.39 (i.e.,  
121 we expect to see a 94% increase in the odds of answering ‘Yes’, for a standard

122 deviation increase in the rhythm discrimination test). In the remainder of the paper, the  
123 “rhythm” trait in our study refers to the self-reported beat synchronization phenotype.

124

### 125 **GWAS results and heritability estimation**

126 GWAS was conducted using logistic regression under an additive genetic model, while  
127 adjusting for age, sex, the top five principal components of ancestry in order to control  
128 for population stratification, and indicators for genotype platforms to account for batch  
129 effects. We excluded SNPs with Minor Allele Frequency (MAF) <0.01, low imputation  
130 quality ( $R^2 < 0.3$ ) and indels, resulting in a final set of 8,288,851 SNPs for all subsequent  
131 analyses. Sixty-eight independent SNPs (after two rounds of LD pruning, first at  $r^2 = 0.6$   
132 and then at  $r^2 = 0.1$ , kb = 250) reached genome-wide significance ( $p < 5 \times 10^{-8}$ ; Figure 1,  
133 Supplementary Table 1, Supplementary Figure 1), from a total of 6,115 SNPs that  
134 passed the significance threshold.

135

136 Linkage Disequilibrium Score Regression (LDSC)<sup>20</sup> analyses revealed that heritability  
137 estimates on the liability scale ranged from 13% to 16% when adjusted for a range of  
138 estimated population prevalence of rhythm deficits (from 3.5% to 6.5%<sup>17,18</sup>)  
139 (Supplementary Table 2, Supplementary Note). The observed SNP-heritability explained  
140 5% (se=0.0002) of the phenotypic variance in the rhythm trait, with an LD score  
141 regression intercept of 1.02 (se=0.01).

142

143 **Gene-based analyses.** Gene-based association analyses performed with MAGMA  
144 yielded 203 genes that surpassed the threshold of  $p < 3 \times 10^{-6}$  (Supplementary Table 3).

145 The top two genes are: *CCSER1*, in proximity to genes previously associated with  
146 musicality<sup>21</sup>, and *VRK2* (converging with the top locus identified in our SNP-based  
147 association analyses).

148  
149 We also examined potential replication of genetic associations with musicality in  
150 humans from prior reports (28 genes were selected including 26 reported in meta-  
151 analysis by<sup>21</sup>, and additionally, *GATA2* and *PCDH7*<sup>22</sup> and *UGT8*<sup>23</sup>. Although none of  
152 the genes reached statistical significance (Supplementary Table 4, Supplementary  
153 Note), several are located near *CCSER1* in the 4q22-24 region.

154

### 155 **Heritability Partitioning**

156 One advantage to SNP-based heritability estimation is the ability to partition heritability  
157 according to SNP-annotations, which provides insight into the types of genetic variation  
158 that contribute most to rhythm. To determine whether heritability is enriched for specific  
159 functional categories of SNP annotations, stratified LDSC<sup>24</sup> was used to partition  
160 heritability (Supplementary Table 5). We hypothesized that SNPs falling into regions of  
161 open chromatin (i.e., accessible to transcriptional machinery), and regions with human-  
162 specific variation, would be enriched for rhythm-associated variation. We found  
163 enrichment in regions conserved in mammals (regions of the genome identified by  
164 Lindblad-Toh et al. 2013 as being under purifying selection) (enrichment=15.8,  $p=1.19 \times$   
165  $10^{-12}$ ) and in functional categories involved in acetylation of histone H3 at lysine 9  
166 (H3K9ac) (enrichment=8.0,  $p=1.85 \times 10^{-8}$ ) and monomethylation of histone H3 at lysine  
167 4 (H3K4me3) (enrichment=1.29,  $p=2.16 \times 10^{-5}$ ), supporting associations mediated by



168 effects on gene regulation. Enrichment was also found in the ‘Repressed’ category of  
169 chromatin states (enrichment=0.87,  $p=0.0002$ ), and for introns. We also examined  
170 whether genes expressed in specific cell-types show enrichment among rhythm-  
171 associated variants as described in <sup>24</sup>: and found that genes expressed specifically in  
172 neurons contributed significantly to trait heritability (coefficient= $1.19 \times 10^{-9}$ ,  $p=0.037$ )  
173 conditional to the other annotations (Supplementary Table 6).

174

### 175 **Gene set analyses**

176 Using FUMA <sup>25</sup>, we performed a gene-property analysis where the average expression  
177 of the genes per tissue type (using GTEx gene expression panels in 53 tissue types <sup>26</sup>  
178 was added as a covariate in the model. As predicted, gene associations were  
179 significantly enriched in brain tissue compared to non-brain tissues (Figure 2). To further  
180 examine potential biological pathways associated with rhythm, we performed MAGMA  
181 gene-set analyses as implemented by FUMA <sup>25</sup>. Two gene-sets out of 10,678 achieved  
182 statistical significance after Bonferroni correction (Supplementary Table 7). The top  
183 associated gene-sets with rhythm were: Negative regulation of transcription from RNA  
184 polymerase II promoter ( $p=8.6 \times 10^{-07}$ ), gene-set from the Gene Ontology project  
185 <sup>27,28</sup>(i.e., any process that includes glucose and decreases the rate or frequency of  
186 transcription from an RNA polymerase II promoter) and Negative regulation of gene  
187 expression ( $2.9 \times 10^{-6}$ ).

188

### 189 **Human Accelerated Region and Neanderthal Introgression Stratified Heritability**

### 190 **Analyses**

191           Given previous hypotheses about the origins of rhythm<sup>6,7,29</sup>, we evaluated the  
192 contribution of regions of the human genome that have experienced significant human-  
193 specific shifts in evolutionary pressure using stratified LDSC<sup>20,24</sup>. In particular, we  
194 analyzed the contribution to rhythm heritability from variants in genomic loci that are  
195 conserved across non-human species, but have elevated substitution rate on the  
196 human lineage<sup>30</sup>. Many of these human accelerated regions (HARs) play roles in  
197 human-specific traits<sup>31</sup>, including cognition<sup>32</sup>. The heritability of rhythm is enriched 2.26-  
198 fold in variants in perfect linkage disequilibrium with HARs ( $p = 0.14$ ). However, given  
199 the small number of variants in these regions and the enrichment of HARs in functional  
200 regions of the genome, it is difficult to explicitly link these shifts to rhythm. Nonetheless,  
201 two of the variants most strongly associated with rhythm (rs14316, rs1464791) fall  
202 within HARs, and the rs1464791 variant is near *GBE1*, a gene associated with a range  
203 of traits including body-mass index (BMI)<sup>33</sup> and cognitive deficits<sup>34</sup>.

204           We also evaluated the contribution of genetic variants detected in the  
205 Neanderthal genome present in modern Eurasians due to interbreeding (hereafter  
206 “Neanderthal variants”) to the heritability of the rhythm phenotype. Eurasian genomes  
207 contain ~1.5-4% of DNA as a result from interbreeding with Neanderthals around  
208 50,000 years ago. Heritability of rhythm was significantly depleted among Neanderthal  
209 variants (1.97-fold depletion,  $P = 0.001$ ). However, Neanderthal ancestry is significantly  
210 depleted in functional genomic regions overall<sup>35</sup>, therefore, the depletion of rhythm  
211 heritability in these regions is likely the result of the overall depletion for Neanderthal  
212 ancestry in functional regions of the genome. This is supported by a non-significant  $\tau_c^*$ ,  
213 illustrating that Neanderthal vs. human variants do not provide unique heritability when

214 conditioned on a broad set of regulatory elements <sup>36</sup>(Supplementary Table 8, Online  
215 Methods).

216

### 217 **Proof-of-concept of the genetics of musicality in a health care context**

218 As a proof-of-concept that genetics of rhythm are more widely tied to the biology of  
219 musicality, we further examined whether the contribution of the common alleles  
220 associated with rhythm en masse (also known as polygenic scores (PGS)) predict the  
221 presence of keywords indicating “musician” status in clinical documentation collected in  
222 the electronic health record (see Supplementary Note for details). In a sample of 67,441  
223 individuals in Vanderbilt’s BioVU, we identified 864 individuals with the keyword  
224 “musician” (or other closely related keywords for musical instruments) present in the  
225 EHR that we compared with 66,577 without any mention of “musician” keywords in their  
226 EHR. We found evidence that the PGS for rhythm was significantly higher among  
227 individuals with the “musician” keywords in their chart (OR per SD increase in PGS,  
228 1.30, 95%CI:1.20-1.38,  $p < 2.5 \times 10^{-13}$ , Nagelkerke’s  $R^2=1\%$ ) (Supplementary Table 9,  
229 Figure 3), confirming our hypothesis that the rhythm phenotype assessed in our study  
230 captures a dimension of musicality.

231

232

233

### 234 **Rhythm beyond the contribution of intelligence**

235 In light of previous work linking rhythm and IQ <sup>17,37</sup>, we used multi-trait conditional  
236 joint analysis <sup>38</sup> (mtcojo) to remove shared genetic effects between intelligence and

237 rhythm. This analysis generated a new set of summary statistics of rhythm in which  
238 betas, standard errors and p-values were adjusted based on the intelligence summary  
239 statistics from <sup>39</sup>. Using FUMA as described above, we identified 66 independent,  
240 genome-wide significant loci in the conditioned GWAS, all of which were within 5kb of  
241 the loci in the unadjusted rhythm summary statistics (Supplementary Table 10,  
242 Supplementary Figure 2). We also compared effect estimates in 47 independent,  
243 genome-wide significant SNPs available from both the unadjusted rhythm and IQ  
244 GWAS datasets; all that were in common between these two datasets remained  
245 significant at the GWAS threshold, and their effect estimates were not changed  
246 (Supplementary Table 11). Also, the genetic correlation between the IQ GWAS dataset  
247 and rhythm was not significant ( $r_g = -0.003$  (standard error = 0.02),  $p = 0.88$ ). Similarly, the  
248 estimates of the heritability in the liability scale remained the same (13% to 16%). These  
249 findings indicate that our results are largely driven by associations with rhythm rather  
250 than cognitive ability.

251 Table 2 shows the rhythm-related loci that are also present in the GWAS  
252 catalogue after adjusting for genetic effects shared with IQ (for a full list of loci see  
253 Supplementary Table 12).

254

### 255 **Cross-trait analyses**

256 To determine if rhythm shares genetic architecture with other traits, we tested  
257 genetic correlations <sup>20</sup> between rhythm and all 764 available traits in LDHub (v.1.9.2)  
258 using LDscore regression. This method is designed to show whether there is shared  
259 genetic variation linked to a particular trait (here, our rhythm trait) and traits measured in

260 other samples/studies. There were 31 statistically significant genetic correlations ( $p < 6.5$   
261  $\times 10^{-5}$ ) between rhythm and other traits after adjusting for multiple comparisons (Figure  
262 4, Supplementary Table 13).

263  
264 As expected, processing speed measured as 'mean time to correctly identify  
265 matches' was negatively correlated with rhythmic ability ( $r_g = -0.16$ ,  $p = 3.22 \times 10^{-13}$ ) (i.e.,  
266 faster processing speed was associated with having rhythm). Educational qualifications  
267 (O' levels/GCSEs or equivalent) ( $r_g = 0.16$ ,  $p = 4.6 \times 10^{-7}$ ), evening chronotype ( $r_g = 0.09$ ,  
268  $p = 3.8 \times 10^{-5}$ ) and tinnitus ( $r_g = 0.20$ ,  $p = 6.7 \times 10^{-6}$ ) were all positively associated with  
269 rhythm. While falling short of the correction for multiple testing, exposure to loud music  
270 was also correlated with a similar point estimate ( $r_g = 0.20$ ,  $p = 2.0 \times 10^{-4}$ ) and could be  
271 due to a relationship between tinnitus and loud music exposure in the UKBB ( $r_g = 0.30$ ,  
272  $p = 4.8 \times 10^{-6}$ )<sup>36,40</sup>.

273 Additionally, we identified significant genetic correlations between rhythm and  
274 hand grip strength ( $r_g(\text{left}) = 0.18$ ,  $se = 0.02$ ,  $p = 3.6 \times 10^{-16}$ ,  $r_g(\text{right}) = 0.16$ ,  $se = 0.02$ ,  $p = 6.91$   
275  $\times 10^{-15}$ ), smoking including 'ever smoked' ( $r_g = 0.16$ ,  $p = 2.5 \times 10^{-11}$ ) and 'past tobacco  
276 smoking' ( $r_g = -0.15$ ,  $p = 4.6 \times 10^{-10}$ ) as well as with peak expiratory flow from both the  
277 UKBiobank ( $r_g = 0.15$ ,  $p = 2.11 \times 10^{-9}$ ) and a second independent GWA study ( $r_g = 0.11$ ,  
278  $p = 6.6 \times 10^{-8}$ ) and several other lung-related phenotypes (Supplementary Table 13).  
279 Given that the majority of these traits come from the UKBiobank, it is also possible that  
280 their genetic correlations with rhythm, may be a function of their correlation with each  
281 other, as some degree of phenotypic correlation is also expected.

282           Recent studies illustrate the potential for very subtle residual population  
283 substructure to influence some polygenic analyses<sup>41</sup> including genetic correlations.  
284 Therefore, we also adjusted the rhythm associations for SNP-loadings on the first  
285 principal component of ancestry estimated from 1KG European populations. We then  
286 used these SNP estimates of ancestry to adjust the rhythm GWAS results which yielded  
287 no change in the genetic correlations results<sup>41</sup> (Supplementary Table 14 and  
288 Supplementary Note).

289           Although we cannot determine potential causality, we conducted MR analyses  
290 using the GSMR<sup>38</sup> to examine whether there are significant bi-directional relationships  
291 between rhythm and processing speed, handgrip strength, and chronotype  
292 (Supplementary Note). We found significant bidirectional relationships for all traits in  
293 the analysis (Supplementary Table 15).

294

### 295 **Sensitivity Analysis of Chromosome 17 locus for chromosomal inversions and** 296 **Parkinson's Disease**

297           Given that the genome-wide significant locus (lead SNP rs4792891) on  
298 chromosome 17q21 is located within a well-established inversion region that may also  
299 be associated with local population substructure<sup>42</sup>, we conducted additional analyses  
300 focused on the region. The inversion was not associated with local ancestry within our  
301 study sample (Supplementary Table 16), suggesting that the association between this  
302 locus and rhythm is not likely to be due to local population confounding.

303           In addition, we sought to explore the potential effect of Parkinson's disease (PD)  
304 phenotype on this Microtubule Associated Protein Tau (*MAPT*) locus (17q21). Taking

305 into account that PD patients may have difficulty discriminating beat-based rhythms<sup>43</sup>,  
306 and also that PD patients are over-represented in the 23andMe database, it was  
307 possible that the inclusion of PD patients in the sample may account for these  
308 associations. The associations between the independent SNP in the locus, rs4792891,  
309 and rhythm remained after removing PD patients from the sample, indicating that this  
310 MAPT association with rhythm is not driven by PD cases (Supplementary Note,  
311 Supplementary Table 17).  
312

## 313 Discussion

314 This study demonstrates that common genetic variation plays a role in a musical  
315 rhythm trait, complementing prior evidence of innate human rhythm sensitivity<sup>6,7</sup>. Based  
316 on a self-reported beat synchronization phenotype that was validated with an objective  
317 measure of rhythm perception, the present large-scale study (606,825 participants from  
318 23andMe) is a significant first step towards well-powered genomic evidence of a  
319 musicality phenotype. Sixty-eight independent SNPs (Supplementary Table 1)  
320 surpassed the threshold for genome-wide significance, with the top-associated locus  
321 mapped to *VRK2-FANCL* (rs848293,  $p=9.2 \times 10^{-18}$ ), a protein kinase with multiple  
322 spliced isoforms expressed in brain that was previously associated with behavioural and  
323 psychiatric phenotypes (i.e., depression, neuroticism and schizophrenia<sup>44-46</sup>  
324 developmental delay)<sup>47</sup>, indicating a biological connection between rhythm and  
325 neurodevelopment.

326 The total SNP-based heritability of our rhythm trait on the liability scale ranged  
327 from 13 to 16%, in line with both estimates of other complex traits (e.g., asthma<sup>48</sup>) and  
328 previously reported heritability estimates of musical rhythm abilities reported in twins<sup>13</sup>.  
329 Enrichment of heritability of rhythm in multiple brain tissues, notably cerebellum, basal  
330 ganglia, and cortex, likely reflects the genetic contribution to subcortical-cortical  
331 networks underlying musical rhythm perception and production<sup>11</sup>. Indeed, brain  
332 structures associated with rhythm include basal ganglia<sup>49-51</sup>, cerebellum<sup>52,53</sup> and  
333 thalamus<sup>54</sup>. Furthermore, we found heritability enriched in genes expressed in neuronal  
334 cell types and in SNPs and genes responsible for expression regulation; taken together,



335 these results suggest that genomic loci that influence rhythm are enriched for effects on  
336 the brain and mediated by regulation of gene expression.

337 Initial clues about the evolution of rhythm traits in humans may be indicated by  
338 the occurrence of two of the rhythm-associated loci in human-accelerated regions  
339 (HARS) of the genome. In particular, rs1464791 is an eQTL that regulates expression of  
340 *GBE1* in multiple tissues including adrenal gland and muscle<sup>26</sup>. It is too early to tell  
341 whether the overlap between rhythm-associated loci and those two HARS support  
342 evolutionary theories about music (e.g., moving to a beat in synchrony during joint  
343 music-making and temporally coordination movements has been posited to have a  
344 selection effect in modern humans by enhancing group social cohesion and mother-  
345 infant bonding<sup>1,55</sup>.

346 The genetic architecture of rhythm remained virtually unchanged after  
347 conditioning the analyses on known GWAS markers of intelligence, in line with twin  
348 studies showing specific genetic effects of rhythmic aptitude, over and above common  
349 genetic influences on rhythm and intelligence<sup>17,56</sup>. Furthermore, 30 loci do not appear to  
350 have existing genome-wide significant associations with other traits in the current  
351 literature, and thus may represent genomic regions newly associated to some aspect of  
352 musicality. At the same time, the other 36 loci coincided with robust associations in the  
353 GWAS catalogue for a variety of cognitive, neuropsychological, and health traits (Table  
354 2, Supplementary Table 12), indicating that rhythm shares genetic architecture with  
355 many other traits. We replicated previous findings implicating location 4q22.1 in  
356 musicality-related traits<sup>12,23</sup> (*CCSER1* was the top-associated gene in our MAGMA  
357 analysis) but did not find support for previous gene associations from prior candidate-

358 gene, linkage, and GWAS studies with relatively small samples <sup>21</sup>, potentially due to  
359 well-known methodological problems with these methods particularly when applied to  
360 small samples <sup>57</sup>.

361 Positive genetic correlations between rhythm and faster processing speed  
362 aligned with prior phenotypic and behavioural genetic studies of cognition, sensory  
363 processing, and musicality <sup>17,56,58,59</sup>. The correlation between rhythm and chronotype  
364 opened up the possibility of a relationship between musical traits and evening  
365 chronotype, complimenting evidence of insomnia in musicians <sup>60</sup>.

366 We found positive genetic correlations with tinnitus, which could be driven by  
367 exposure to loud music (this latter correlation with rhythm was just above the  
368 significance threshold after multiple-test corrections); both commonly occur among  
369 musicians and may lead to hearing loss <sup>61</sup> highlighting the importance of estimating the  
370 prevalence of professional musicians within the study sample in future GWAS of rhythm  
371 (this information was not available in the current sample). Unexpected genetic  
372 correlations included associations of rhythm with better lung capacity, previous smoker  
373 phenotypes, and greater handgrip strength. In light of recent evidence that lung function  
374 is genetically related to motor function, processing speed, and cognition in older adults  
375 <sup>62</sup>, it is possible that rhythm shares common biology with a constellation of traits. These  
376 lines of research may have clinical-translational implications: for example, a recent  
377 intervention study found that music listening improved handgrip strength in older adults  
378 <sup>63</sup>. We also uncovered shared genetic effects between musical rhythm and biological  
379 rhythms including circadian chronotypes and breathing-related phenotypes.

380 More broadly, the genetic correlations between rhythm and other complex traits  
381 were relatively modest, suggesting that the present phenotype is not primarily  
382 confounded/co-occurring with any particular trait we examined. There are no large-  
383 sample GWAS data for major processes fundamental to beat synchronization <sup>7,11</sup>:  
384 auditory processing, sensori-motor synchronization, locomotion, or temporal processing  
385 as a component of general timing abilities <sup>64</sup>, for which we may expect greater genetic  
386 correlations with rhythm in future studies.

387 The primary limitation of our study is the self-reported assessment of rhythm.  
388 Although our independent phenotypic validation study indicated that an individual's self-  
389 assessment of beat synchronization is related to their objectively-measured rhythm  
390 perception abilities, the self-report itself is not an objective assessment of rhythm.  
391 Nevertheless, previous studies of other health traits based on self-report have  
392 effectively replicated associations from studies using validated assessments, indicating  
393 that a powerful sample size can overcome limitations arising from phenotyping error <sup>65</sup>.  
394 The selection of the self-report beat synchronization phenotype was made because it  
395 theoretically relates to fundamental components of rhythm including motor periodicity,  
396 beat extraction, meter perception, and auditory-motor entrainment (see <sup>7</sup> and Glossary  
397 in Supplementary Note). Nevertheless, the phenotype available in our GWAS dataset  
398 did not allow us to separate the rhythm phenotype into those component factors, and  
399 the prevalence of individuals with musical training in the sample was not established.  
400 However, given the result that polygenic score for rhythm predicted the presence of  
401 musician keywords in an electronic health record-linked biobank, it is likely that we have  
402 indeed captured a robust aspect of musicality. These results are promising for future

403 large-scale genomic interrogations using comprehensive music phenotyping yielding  
404 continuous musicality variables (whether questionnaire-based <sup>10,66</sup> or objective aptitude-  
405 based <sup>13</sup>). Even without continuous measures of rhythm, here we have identified biology  
406 potentially differentiating rhythm deficits <sup>67</sup> from typical rhythm development. Once  
407 GWAS results are available from other heritable musicality traits such as pitch  
408 discrimination and music training <sup>14</sup>, the field will be able to test for moderate genetic  
409 correlations between rhythm and other musical traits as predicted by family-based  
410 studies <sup>12,13,68</sup>. Another important area of inquiry will be to investigate musicality and  
411 cross-trait correlations in populations of non-European ancestry, hence capturing the  
412 spectra of musicality, a human universal, in a wider range of ethnic, cultural and socio-  
413 economic contexts.

## 414 **Online Methods**

### 415 **Study sample**

416 We obtained genome-wide association study summary statistics from the personal  
417 genetics company 23andMe, Inc. Phenotypic status was based on responses to online  
418 surveys in which individuals self-reported “Yes” (cases) or “No” (controls) to the  
419 question ‘Can you clap in time with a musical beat?’. Individuals who responded “I’m  
420 not sure” were excluded from our genomic study. The GWAS included a total of  
421 555,660 cases and 51,165 controls (total N=606,825, mean age(SD)=52.09(18.5),  
422 prevalence=92%). Specifically, 10.4% of the individuals were 30 years old or younger,  
423 24.4% were between 30 and 45 years old, 27.1% were between 45 and 60 years old  
424 and 38.1% were older than 60 years old (Table 1). All individuals provided informed  
425 consent according to 23andMe’s human subject protocol, which is reviewed and  
426 approved by Ethical & Independent Review Services, a private institutional review board  
427 (<http://www.eandireview.com>).

### 428 **Phenotype validation study**

429 *Overview.* To validate the rhythm phenotype used in the genetic study, we conducted a  
430 separate internet-based study in N=724 participants from Amazon’s Mechanical Turk.  
431 The experiment was designed to determine if self-reported rhythm abilities measured  
432 with the question used in the GWAS (i.e., ‘Can you clap in time with a musical beat?’)  
433 would be associated with objective performance on a task of rhythm abilities. The Beat-  
434 based advantage paradigm was selected as a rhythm discrimination test due to its  
435 design of stimuli with simple and complex meter<sup>69</sup> and prior history investigating

436 individual differences in rhythm perception in a variety of brain and behavioural studies  
437 in adults and children with typical and atypical development <sup>19,43,70,71</sup>, as well as  
438 feasibility for internet-based adaptation. The questionnaire (self-report questions) was  
439 administered prior to the perception task, to avoid biasing participant self-report  
440 responses by how they perceived they performed on the objective test.

441

#### 442 *Participants*

443 We recruited 724 participants anonymously from Amazon Mechanical Turk. The study  
444 received ethical approval from the Columbia University Institutional Review Board.  
445 Participants (333 females) were 18-73 years old (mean = 36.1 years, SD=10.9) with 0-  
446 45 years of self-reported musical experience (mean 3.7 years, SD=5.8).

447

#### 448 *Stimuli*

449 Stimuli consisted of 32 rhythms drawn from prior work <sup>19,69</sup>; half were “simple” rhythms  
450 (strong beat-based metrical structure and generally easier to discriminate) and half were  
451 “complex” rhythms (weaker metrical structure due to syncopation and generally more  
452 challenging to discriminate). Each rhythm was presented as a pure tone in one of 6  
453 frequencies (294, 353, 411, 470, 528, and 587 Hz, selected at random), and one of 4  
454 durations (ISI of 220, 230, 240, and 250 ms). Each trial consisted of 3 rhythms  
455 separated by 1500 ms of silence. As in prior work, the two first presentations were  
456 always identical, and in half of the trials (counterbalanced) the third rhythm was also  
457 identical (standard condition); in the other trials the rhythm was slightly different (deviant  
458 condition).

459

460 *Procedure*

461 Amazon Mechanical Turk (M-Turk) participants were invited to participate in an  
462 experiment where they would “listen to sounds and answer questions”. To simulate the  
463 user environment within 23andMe where research participants answer a series of  
464 unrelated questions about health and other traits, we asked participants to provide  
465 answers for a series of randomly presented questions on a variety of other topics  
466 (presented at random order; see methods), such as “Do you have wisdom teeth?”.  
467 Among these questions we embedded two rhythm-related questions: the target  
468 question: “Can you clap in time with a musical beat?” and an additional question, “Do  
469 you have a good sense of rhythm?”. After answering these questions, participants  
470 passed a test for usage of headphones<sup>72</sup>. This test checks whether participants can  
471 hear sounds that are presented through headphones, and guarantees good listening  
472 conditions as well as the ability to follow instructions. Participants that passed the  
473 headphone test were invited to perform the rhythm perception task (Supplementary  
474 Figure 3).

475

476 Participants received 8 training trials that were selected from rhythms that were not part  
477 of the test set, and then performed 32 rhythm perception task trials. In all trials (practice  
478 and task) participants received feedback regarding their performance (“correct” and  
479 “incorrect”), and each correct trial resulted in adding a small monetary bonus.  
480 Participants were paid for their performance about \$1.60-\$2.00 depending on their  
481 performance, and the duration of the test was about 16-18 minutes. Participants who

482 did not pass the headphone test received \$0.20 for about one minute of answering the  
483 initial questions and performing the headphone test. Participant demographic data was  
484 collected after the rhythm test.

485

## 486 **Phenotype Validation Results**

487 654 (90.3%), 25 (3.5%) and 45 (6.2%) participants answered “yes”, “no,” and “I’m not  
488 sure” to the target question, “Can you clap in time to a musical beat”. Regarding the  
489 self-report question ‘Do you have a good sense of rhythm?’, 503(67%) answered ‘Yes’,  
490 102(14%) answered ‘No’ and 117(16%) answered ‘I don’t know’. N=488 answered Yes  
491 to both questions, while 166 answered Yes to the Clap to Beat question and 15  
492 answered Yes to the sense of rhythm question, resulting in a total tetrachoric correlation  
493 between these two self-report questions of  $r=0.73$ .

494

495 Responses to the rhythm discrimination perception test were analysed using signal  
496 detection theory<sup>73</sup>, as in<sup>19</sup>; this method is appropriate for discrimination tasks where  
497 the participant has to categorize stimuli along some dimension; the resulting  $d'$  values  
498 the strength of detection of the signal relative to noise.  $d'$  values were calculated on the  
499 32 test trials (16 simple rhythm trials and 16 complex rhythm trials) and are reported in  
500 Supplementary Table 18. As expected from prior work<sup>19,70</sup>, individuals scored better in  
501 the simple rhythms than the complex rhythms ( $t(724)=11.11$ ,  $p<2.2 \times 10^{-16}$ , Cohen’s  
502  $d=0.58$  (Supplementary Figure 4).

503 To examine whether the self-report of rhythm ability was related to the objective  
504 performance on the rhythm discrimination/perception test (see task performance in



505 relation to responses to self-report, shown in Supplementary Figure 5a), we performed  
506 a logistic regression analysis in which the self-report rhythm question (Yes vs. No) was  
507 the outcome and the rhythm discrimination test performance (standardized  $d'$  scores  
508 mean = 0, SD = 1) was the predictor. Covariates included age at time of assessment,  
509 education, and sex. Individuals with higher performance in the rhythm discrimination  
510 test (total  $d'$ ) were more likely to answer that they can clap to the beat  
511 (OR(95%CI)=1.94(1.28 to 3.01),  $p=0.002$ , McFadden's  $R^2=0.39$ ), indicating there is  
512 approximately a 94% increase in the odds of answering 'Yes', per standard deviation  
513 increase in the rhythm discrimination test. We did not include 'I'm not sure' in the  
514 regression, because this answer is not included in the phenotype assessment of the  
515 genetic study. Because the simple rhythms have a strong metrical structure and are  
516 known to facilitate detection and synchronization of the beat <sup>19</sup>, we also tested whether  
517 performance on the simple rhythm trials predicted self-reported beat synchronization  
518 (i.e., those who responded Yes to the clap-to-beat question). As above, we found that  
519 individuals with higher scores on the simple rhythm trials were more likely to answer  
520 that they can clap to the beat (OR(95%CI)=1.99(1.36-2.90),  $p<0.001$ , McFadden's  
521  $R^2=0.40$  (Supplementary Figure 5b). Taken together, these results suggest that the  
522 "clap to the beat" self-report phenotype is a broad representation of musical rhythm  
523 ability, potentially capturing aspects both of rhythm perception ability and of self-  
524 perceived beat synchronization ability.

525

## 526 **Genotypes and QC**

### 527 **23andMe dataset**

528 The National Genetics Institute (NGI) performed the DNA extraction and genotyping on  
529 saliva samples. Overall, there were five genotyping platforms and subjects were  
530 genotyped on only one of them. The v1 and v2 platforms had variants of the Illumina  
531 HumanHap550+ BeadChip, including approximately 25,000 custom SNPs selected by  
532 23andMe, with a total of about 560,000 SNPs. The v3 platform had variants of the  
533 Illumina OmniExpress+ BeadChip, with custom content to improve the overlap with the  
534 v2 array, with a total of about 950,000 SNPs. The v4 platform covered about 570,000  
535 SNPs, providing extra coverage of lower-frequency coding variation. The v5 platform, in  
536 current use, is based on an Illumina Infinium Global Screening Array (~640,000 SNPs)  
537 supplemented with ~50,000 SNPs of custom content. In cases where samples did not  
538 reach the 98.5% call rate, the sample was re-genotyped. When analyses failed  
539 repeatedly, then customers were re-contacted by 23andMe customer service to provide  
540 additional samples.

541  
542 23andMe restricted participants to a set of unrelated individuals of European ancestry  
543 as determined through an analysis of local ancestry <sup>74</sup>. Relatedness was defined using  
544 a segmental identity-by-descent (IBD) estimation algorithm <sup>75</sup>. Imputation was  
545 conducted by combining the May 2015 release of 1000 Genomes Phase 3 haplotypes <sup>76</sup>  
546 with the UK10K imputation reference panel <sup>77</sup> to create a single unified imputation  
547 reference panel. Phasing was conducted using an internally-developed tool, Finch,  
548 which uses the Beagle graph-based haplotype phasing algorithm <sup>78</sup> for platforms V1 to  
549 V4 while for the V5 platform a similar approach was used with a new phasing algorithm,  
550 Eagle2 <sup>79</sup>. SNPs with a Hardy-Weinberg  $p < 10^{-20}$ , or a call rate of <90% were flagged.

551 SNPs were also flagged if they were only genotyped on their 'V1' and/or 'V2' platforms  
552 due to small sample size and also if SNPs had genotype date effects. Finally, SNPs  
553 were also flagged if they had probes matching multiple genomic positions in the  
554 reference genome <sup>75-79</sup>.

555

## 556 **GWAS**

557 GWAS was conducted using logistic regression under an additive genetic model, while  
558 adjusting for age, sex, the top five principal components of ancestry in order to control  
559 for population stratification, and indicators for genotype platforms to account for batch  
560 effects. We excluded SNPs with Minor Allele Frequency (MAF) <0.01, low imputation  
561 quality ( $R^2 < 0.3$ ) and indels, resulting in a final set of 8,288,851 SNPs for all subsequent  
562 analyses.

563

## 564 **Statistical analyses**

565 *FUMA-based analyses.* The FUMA <sup>25</sup> web application was used on the Genome-Wide  
566 Association summary statistics to identify the SNPs that were independent in our  
567 analysis with a genome-wide significant P-value ( $< 5 \times 10^{-8}$ ) that are in approximate  
568 linkage disequilibrium (LD) with each other at  $r^2 < 0.1$  and to generate Manhattan and  
569 Quantile-Quantile plots and the SNP functional annotations.

570 Gene analysis and gene-set analysis was performed with MAGMA (v1.07) using FUMA  
571 (v1.3.4) and the association analysis summary statistics. Gene expression analysis was  
572 obtained from GTEx v7 (<https://www.gtexportal.org/home/>) integrated by FUMA <sup>80</sup>. More  
573 specifically, the gene expression values were log2 transformed average RPKM per

574 tissue type after winsorization at 50 based on GTEx RNA-seq data. Tissue expression  
575 analysis was performed for 53 tissue types where the result of gene analysis was tested  
576 for one side while conditioning on average expression across all tissue types.

577

578 *LD score regression and genetic correlations.* SNP-heritability was computed with LD  
579 Score regression software <sup>24</sup>, and heritability estimates were adjusted to the liability  
580 scale based on population prevalence of rhythm deficits of 3.5%-6.5% (Supplementary  
581 Table 2, Supplementary Note). We then partitioned heritability of rhythm by functional  
582 category and investigated cell-type-specific enrichments using stratified LD score  
583 regression as per <sup>24</sup>. The Bonferroni-corrected p-value was  $0.05/1015=4.9 \times 10^{-5}$ .

584 The set of human accelerated regions (HARs) was taken from <sup>30</sup>. All variants in  
585 perfect LD ( $r^2 = 1.0$  in 1000 Genomes European individuals) with variants in HARs were  
586 considered in the analysis. Similarly, variants tagging Neanderthal introgressed  
587 haplotypes were defined as in <sup>81</sup>. All variants in perfect LD with a Neanderthal tag SNP  
588 were considered Neanderthal variants. For each set, we performed stratified LDSC  
589 (v1.0.0) with European LD scores and the baseline LD-score annotations v2.1. The  
590 heritability enrichment is defined as the proportion of heritability explained by SNPs in  
591 the annotation divided by the proportion of SNPs in the annotation. Standard effect size  
592 ( $\tau_c^*$ ), which quantifies the effects unique to the annotation, is the proportionate change in  
593 per-SNP heritability associated with a one standard deviation increase in the value of  
594 the annotation, conditional on other annotations in the baseline v2.1 model <sup>82</sup>.

595 Genetic correlations between rhythm and other complex traits were estimated  
596 using LDSC through LD Hub v1.9.0 (<http://ldsc.broadinstitute.org/ldhub/>) <sup>16</sup> and publicly

597 available GWAS summary statistics. 764 traits were examined and the Bonferroni  
598 corrected p-value threshold for significance was  $0.05/764=6.5 \times 10^{-5}$ . To examine  
599 whether the genetic correlations are influenced by residual population stratification, we  
600 adjusted the rhythm GWAS summary statistics for the SNP PC-loadings of all top 10  
601 PCs. PC loadings were generated from the 1000 Genomes Project because individual-  
602 level genotype data was unavailable on the analysed sample <sup>83</sup>, following <sup>41</sup>.

603

604 We used the gsmr R-package (gcta version:v1.92.1beta6) to implement Generalised  
605 Summary-data-based Mendelian Randomization to test for causal genetic associations  
606 <sup>38</sup>; see Supplementary Note.

607

608 *Conditional analyses.*

609 To control for pleiotropy between cognition and rhythm abilities(23) and identify genetic  
610 effects of rhythm traits above and beyond those shared with IQ, we ran a multi-trait  
611 conditional and joint analysis (mtCOJO) <sup>38</sup>, conditioning on intelligence using GWAS  
612 summary statistics from <sup>39</sup>.

613

614

615  
616 **Acknowledgments:** We are grateful to 23andMe participants for their contribution to  
617 the study and to Nancy Cox for suggestions and insight throughout the process. We  
618 would also like to thank Michaela Novakovic, Yune Lee, and Duane Watson for input  
619 during previous stages of the project and Vanderbilt Trans-Institutional Programs for  
620 sparking the initial collaboration. Members of the 23andMe Research Team are:  
621 Michelle Agee, Stella Aslibekyan, Adam Auton, Robert K. Bell, Katarzyna Bryc, Sarah  
622 K. Clark, Sarah L. Elson, Kipper Fletez-Brant, Pierre Fontanillas, Nicholas A. Furlotte,  
623 Pooja M. Gandhi, Karl Heilbron, Barry Hicks, Karen E. Huber, Ethan M. Jewett,  
624 Yunxuan Jiang, Aaron Kleinman, Keng-Han Lin, Nadia K. Litterman, Jennifer C.  
625 McCreight, Matthew H. McIntyre, Kimberly F. McManus, Joanna L. Mountain, Sahar V.  
626 Mozaffari, Priyanka Nandakumar, Elizabeth S. Noblin, Carrie A.M. Northover, Jared  
627 O'Connell, Steven J. Pitts, G. David Poznik, Anjali J. Shastri, Janie F. Shelton, Suyash  
628 Shringarpure, Chao Tian, Joyce Y. Tung, Robert J. Tunney, Vladimir Vacic, and Xin  
629 Wang.

630

631 **Funding:**

632 Research reported in this publication was supported by the Eunice Kennedy Shriver  
633 National Institute of Child Health & Human Development of the National Institutes of  
634 Health under Award Number DP2HD098859 and by the National Institute On Deafness  
635 And Other Communication Disorders of the National Institutes of Health under Award  
636 Number K18DC017383. JAC was supported by the National Institutes of Health  
637 (R35GM127087). The content is solely the responsibility of the authors and does not

638 necessarily represent the official views of the National Institutes of Health. MN was  
639 supported by the Wellcome Trust (110222/Z/15/Z).  
640 The dataset used for the analyses described were obtained from Vanderbilt University  
641 Medical Center's BioVU which is supported by numerous sources: institutional funding,  
642 private agencies, and federal grants. These include the NIH funded Shared  
643 Instrumentation Grant S10RR025141; and CTSA grants UL1TR002243, UL1TR000445,  
644 and UL1RR024975. Genomic data are also supported by investigator-led projects that  
645 include U01HG004798, R01NS032830, RC2GM092618, P50GM115305,  
646 U01HG006378, U19HL065962, R01HD074711; and additional funding sources listed  
647 at <https://victr.vanderbilt.edu/pub/biovu/>. Also, The Genotype-Tissue Expression (GTEx)  
648 Project was supported by the Common Fund of the Office of the Director of the National  
649 Institutes of Health, and by NCI, NHGRI, NHLBI, NIDA, NIMH, and NINDS. The data  
650 used for the analyses described in this manuscript were obtained from: the GTEx Portal  
651 on 07/26/19 and dbGaP accession number phs000424.vN.pN on 07/26/19 .

652

653

#### 654 **Author contributions**

655 *Conceptualization of study:* Reyna Gordon, Lea Davis

656 *Study design of GWAS and design of other genomic analyses:*

657 Lea Davis, Reyna Gordon, J. Fah Sathirapongsasuti, Maria Niarchou, Tony Capra, David Hinds

658 *Data collection of genomic data:* J. Fah Sathirapongsasuti, The 23andMe Research Team,

659 David Hinds

660 *Genome-wide Association analysis:* J. Fah Sathirapongsasuti, The 23andMe Research Team

661

662 *Post-association QC and generation of figures:* Peter Straub and Maria Niarchou  
663 *Post-GWAS analyses (heritability, gene-based analyses, gene set analyses, LD correlations,*  
664 *GSMR, mtcojo, PGS in BioVU):*  
665 Maria Niarchou, Reyna Gordon, Peter Straub, Lea Davis  
666 *HARS and Neanderthal introgression analyses and interpretation:* Evonne McArthur, John A  
667 Capra  
668 *Sensitivity Analyses of Chromosome 17 inversion and Parkinson's Disease:* J. Fah  
669 Sathirapongsasuti  
670 *Estimation of population prevalence of rhythm deficits:* Miriam A Mosing and Reyna Gordon  
671 *Phenotype validation study design and materials:* Reyna Gordon, J. Devin McAuley, Nori  
672 Jacoby  
673 *Phenotype validation data collection:* Nori Jacoby, Eamonn Bell  
674 *Phenotype validation study data analysis:* Eamonn Bell, Nori Jacoby, Peter Straub, Maria  
675 Niarchou, Reyna Gordon  
676 *Interpretation of data, writing, editing, and reviewing drafts:* All authors  
677 *Project Supervision:* Reyna Gordon, Lea Davis, David Hinds  
678  
679  
680 **Competing interests:** JFS, DH, and members of the 23andMe Research Team are  
681 employees of 23andMe, Inc., and hold stock or stock options in 23andMe. All other  
682 authors declare no competing interests.  
683  
684 **Data and materials availability:** The full GWAS summary statistics for the 23andMe  
685 dataset will be made available through 23andMe to qualified researchers under an  
686 agreement that protects the privacy of the 23andMe participants. Please visit



687 [research.23andme.com/collaborate/#publication](https://research.23andme.com/collaborate/#publication) for more information and to apply to  
688 access the data. The data and code from the phenotype validation study, and all of the  
689 code from the post-GWAS analyses, are also available upon reasonable request.  
690

691 **References**

- 692
- 693 1 Savage, P. E., Brown, S., Sakai, E. & Currie, T. E. Statistical universals reveal  
694 the structures and functions of human music. *Proc Natl Acad Sci U S A* **112**,  
695 8987-8992, doi:10.1073/pnas.1414495112 (2015).
- 696 2 Trehub, S. E. Cross-cultural convergence of musical features. *Proceedings of the*  
697 *National Academy of Sciences* **112**, 8809-8810, doi:10.1073/pnas.1510724112  
698 (2015).
- 699 3 Nazzi, T., Bertoncini, J. & Mehler, J. Language discrimination by newborns:  
700 toward an understanding of the role of rhythm. *J Exp Psychol Hum Percept*  
701 *Perform* **24**, 756-766 (1998).
- 702 4 Cirelli, L. K., Trehub, S. E. & Trainor, L. J. Rhythm and melody as social signals  
703 for infants. *Annals of the New York Academy of Sciences* **1423**, 66-72 (2018).
- 704 5 McAuley, J. D., Jones, M. R., Holub, S., Johnston, H. M. & Miller, N. S. The time  
705 of our lives: life span development of timing and event tracking. *J Exp Psychol*  
706 *Gen* **135**, 348-367, doi:10.1037/0096-3445.135.3.348 (2006).
- 707 6 Patel, A. D. & Iversen, J. R. The evolutionary neuroscience of musical beat  
708 perception: the Action Simulation for Auditory Prediction (ASAP) hypothesis.  
709 *Frontiers in systems neuroscience* **8**, 57 (2014).
- 710 7 Kotz, S. A., Ravignani, A. & Fitch, W. T. The Evolution of Rhythm Processing.  
711 *Trends in Cognitive Sciences* **22**, 896-910,  
712 doi:<https://doi.org/10.1016/j.tics.2018.08.002> (2018).
- 713 8 Grahn, J. A. & McAuley, J. D. Neural bases of individual differences in beat  
714 perception. *NeuroImage* **47**, 1894-1903 (2009).
- 715 9 Law, L. N. & Zentner, M. Assessing musical abilities objectively: Construction  
716 and validation of the Profile of Music Perception Skills. *PloS one* **7**, e52508  
717 (2012).
- 718 10 Müllensiefen, D., Gingras, B., Musil, J. & Stewart, L. The musicality of non-  
719 musicians: an index for assessing musical sophistication in the general  
720 population. *PloS one* **9**, e89642 (2014).
- 721 11 Merchant, H., Grahn, J., Trainor, L., Rohrmeier, M. & Fitch, W. T. Finding the  
722 beat: a neural perspective across humans and non-human primates. *Philos*  
723 *Trans R Soc Lond B Biol Sci* **370**, 20140093, doi:10.1098/rstb.2014.0093 (2015).
- 724 12 Pulli, K. *et al.* Genome-wide linkage scan for loci of musical aptitude in Finnish  
725 families: evidence for a major locus at 4q22. *J Med Genet* **45**, 451-456,  
726 doi:10.1136/jmg.2007.056366 (2008).
- 727 13 Ullén, F., Mosing, M. A., Holm, L., Eriksson, H. & Madison, G. Psychometric  
728 properties and heritability of a new online test for musicality, the Swedish Musical  
729 Discrimination Test. *Personality and Individual Differences* **63**, 87-93 (2014).
- 730 14 Gingras, B., Honing, H., Peretz, I., Trainor, L. J. & Fisher, S. E. Defining the  
731 biological bases of individual differences in musicality. *Philosophical*  
732 *Transactions of the Royal Society B: Biological Sciences* **370**, 20140092,  
733 doi:doi:10.1098/rstb.2014.0092 (2015).
- 734 15 Wray, N. R., Goddard, M. E. & Visscher, P. M. Prediction of individual genetic  
735 risk of complex disease. *Current opinion in genetics & development* **18**, 257-263  
736 (2008).

- 737 16 Zheng, J. *et al.* LD Hub: a centralized database and web interface to perform LD  
738 score regression that maximizes the potential of summary level GWAS data for  
739 SNP heritability and genetic correlation analysis. *Bioinformatics* **33**, 272-279,  
740 doi:10.1093/bioinformatics/btw613 (2017).
- 741 17 Mosing, M. A., Verweij, K. J., Madison, G. & Ullén, F. The genetic architecture of  
742 correlations between perceptual timing, motor timing, and intelligence.  
743 *Intelligence* **57**, 33-40 (2016).
- 744 18 Peretz, I. & Vuvan, D. T. Prevalence of congenital amusia. *European Journal of*  
745 *Human Genetics* **25**, 625 (2017).
- 746 19 Grahn, J. A. & Brett, M. Rhythm and beat perception in motor areas of the brain.  
747 *Journal of cognitive neuroscience* **19**, 893-906 (2007).
- 748 20 Bulik-Sullivan, B. K. *et al.* LD Score regression distinguishes confounding from  
749 polygenicity in genome-wide association studies. *Nat Genet* **47**, 291-295,  
750 doi:10.1038/ng.3211 (2015).
- 751 21 Oikkonen, J., Onkamo, P., Järvelä, I. & Kanduri, C. Convergent evidence for the  
752 molecular basis of musical traits. *Scientific Reports* **6**, 39707,  
753 doi:10.1038/srep39707  
754 <https://www.nature.com/articles/srep39707 - supplementary-information> (2016).
- 755 22 Oikkonen, J. *et al.* A genome-wide linkage and association study of musical  
756 aptitude identifies loci containing genes related to inner ear development and  
757 neurocognitive functions. *Molecular psychiatry* **20**, 275 (2015).
- 758 23 Park, H. *et al.* Comprehensive genomic analyses associate UGT8 variants with  
759 musical ability in a Mongolian population. *J Med Genet* **49**, 747-752,  
760 doi:10.1136/jmedgenet-2012-101209 (2012).
- 761 24 Finucane, H. K. *et al.* Partitioning heritability by functional annotation using  
762 genome-wide association summary statistics. *Nature genetics* **47**, 1228 (2015).
- 763 25 Watanabe, K., Taskesen, E., van Bochoven, A. & Posthuma, D. Functional  
764 mapping and annotation of genetic associations with FUMA. *Nature*  
765 *Communications* **8**, 1826, doi:10.1038/s41467-017-01261-5 (2017).
- 766 26 Consortium, G. The Genotype-Tissue Expression (GTEx) pilot analysis:  
767 multitissue gene regulation in humans. *Science* **348**, 648-660 (2015).
- 768 27 Ashburner, M. *et al.* Gene ontology: tool for the unification of biology. *Nature*  
769 *genetics* **25**, 25 (2000).
- 770 28 The Gene Ontology, C. The Gene Ontology Resource: 20 years and still GOing  
771 strong. *Nucleic Acids Res* **47**, D330-D338, doi:10.1093/nar/gky1055 (2019).
- 772 29 Mithen, S. J. *The Singing Neanderthals: The origins of music, language, mind,*  
773 *and body.*, (Harvard University Press, 2005).
- 774 30 Capra, J. A., Erwin, G. D., McKinsey, G., Rubenstein, J. L. & Pollard, K. S. Many  
775 human accelerated regions are developmental enhancers. *Philos Trans R Soc*  
776 *Lond B Biol Sci* **368**, 20130025, doi:10.1098/rstb.2013.0025 (2013).
- 777 31 Hubisz, M. J. & Pollard, K. S. Exploring the genesis and functions of Human  
778 Accelerated Regions sheds light on their role in human evolution. *Curr Opin*  
779 *Genet Dev* **29**, 15-21, doi:10.1016/j.gde.2014.07.005 (2014).
- 780 32 Doan, R. N. *et al.* Mutations in Human Accelerated Regions Disrupt Cognition  
781 and Social Behavior. *Cell* **167**, 341-354 e312, doi:10.1016/j.cell.2016.08.071  
782 (2016).

- 783 33 Kichaev, G. *et al.* Leveraging Polygenic Functional Enrichment to Improve  
784 GWAS Power. *Am J Hum Genet* **104**, 65-75, doi:10.1016/j.ajhg.2018.11.008  
785 (2019).
- 786 34 Davies, G. *et al.* Study of 300,486 individuals identifies 148 independent genetic  
787 loci influencing general cognitive function. *Nature communications* **9**, 2098  
788 (2018).
- 789 35 Sankararaman, S. *et al.* The genomic landscape of Neanderthal ancestry in  
790 present-day humans. *Nature* **507**, 354-357, doi:10.1038/nature12961 (2014).
- 791 36 Couth, S., Mazlan, N., Moore, D., Munro, K. & Dawes, P. Hearing difficulties and  
792 tinnitus in construction, agricultural, music and finance industries: contributions of  
793 demographic, health and lifestyle factors. *Trends in Hearing* (in press).
- 794 37 Mosing, M. A., Madison, G., Pedersen, N. L. & Ullén, F. Investigating cognitive  
795 transfer within the framework of music practice: Genetic pleiotropy rather than  
796 causality. *Developmental Science* **19**, 504-512 (2016).
- 797 38 Zhu, Z. *et al.* Causal associations between risk factors and common diseases  
798 inferred from GWAS summary data. *Nature Communications* **9**, 224,  
799 doi:10.1038/s41467-017-02317-2 (2018).
- 800 39 Savage, J. E. *et al.* Genome-wide association meta-analysis in 269,867  
801 individuals identifies new genetic and functional links to intelligence. *Nature*  
802 *genetics* **50**, 912 (2018).
- 803 40 Watanabe, K. *et al.* A global overview of pleiotropy and genetic architecture in  
804 complex traits. *Nature Genetics* **51**, 1339-1348, doi:10.1038/s41588-019-0481-0  
805 (2019).
- 806 41 Bhatia, G. *et al.* Correcting subtle stratification in summary association statistics.  
807 *bioRxiv*, 076133 (2016).
- 808 42 Steinberg, K. M. *et al.* Structural diversity and African origin of the 17q21.31  
809 inversion polymorphism. *Nat Genet* **44**, 872-880, doi:10.1038/ng.2335 (2012).
- 810 43 Grahn, J. A. & Brett, M. Impairment of beat-based rhythm discrimination in  
811 Parkinson's disease. *Cortex* **45**, 54-61 (2009).
- 812 44 Luciano, M. *et al.* Association analysis in over 329,000 individuals identifies 116  
813 independent variants influencing neuroticism. *Nat Genet* **50**, 6-11,  
814 doi:10.1038/s41588-017-0013-8 (2018).
- 815 45 Nagel, M. *et al.* Meta-analysis of genome-wide association studies for  
816 neuroticism in 449,484 individuals identifies novel genetic loci and pathways. *Nat*  
817 *Genet* **50**, 920-927, doi:10.1038/s41588-018-0151-7 (2018).
- 818 46 Pardini, A. F. *et al.* Common schizophrenia alleles are enriched in mutation-  
819 intolerant genes and in regions under strong background selection. *Nat Genet*  
820 **50**, 381-389, doi:10.1038/s41588-018-0059-2 (2018).
- 821 47 Lévy, J. *et al.* Molecular and clinical delineation of 2p15p16. 1 microdeletion  
822 syndrome. *American Journal of Medical Genetics Part A* **173**, 2081-2087 (2017).
- 823 48 Vicente, C. T., Revez, J. A. & Ferreira, M. A. R. Lessons from ten years of  
824 genome-wide association studies of asthma. *Clinical & Translational Immunology*  
825 **6**, e165, doi:10.1038/cti.2017.54 (2017).
- 826 49 Grahn, J. A. & Rowe, J. B. Feeling the Beat: Premotor and Striatal Interactions in  
827 Musicians and Nonmusicians during Beat Perception. *The Journal of*  
828 *Neuroscience* **29**, 7540-7548, doi:10.1523/jneurosci.2018-08.2009 (2009).

- 829 50 Grahn, J. A. & Rowe, J. B. Finding and feeling the musical beat: striatal  
830 dissociations between detection and prediction of regularity. *Cerebral cortex* **23**,  
831 913-921 (2012).
- 832 51 Kung, S.-J., Chen, J. L., Zatorre, R. J. & Penhune, V. B. Interacting cortical and  
833 basal ganglia networks underlying finding and tapping to the musical beat.  
834 *Journal of Cognitive Neuroscience* **25**, 401-420 (2013).
- 835 52 Bengtsson, S. L. *et al.* Listening to rhythms activates motor and premotor  
836 cortices. *Cortex* **45**, 62-71, doi:<https://doi.org/10.1016/j.cortex.2008.07.002>  
837 (2009).
- 838 53 Teki, S., Grube, M., Kumar, S. & Griffiths, T. D. Distinct Neural Substrates of  
839 Duration-Based and Beat-Based Auditory Timing. *The Journal of Neuroscience*  
840 **31**, 3805-3812, doi:10.1523/jneurosci.5561-10.2011 (2011).
- 841 54 McAuley, J. D., Henry, M. J. & Tkach, J. Tempo mediates the involvement of  
842 motor areas in beat perception. *Annals of the New York Academy of Sciences*  
843 **1252**, 77-84 (2012).
- 844 55 Dissanayake, E. If music is the food of love, what about survival and reproductive  
845 success? *Musicae scientiae* **12**, 169-195 (2008).
- 846 56 Mosing, M. A., Pedersen, N. L., Madison, G. & Ullén, F. Genetic pleiotropy  
847 explains associations between musical auditory discrimination and intelligence.  
848 *PLoS One* **9**, e113874 (2014).
- 849 57 Border, R. *et al.* No support for historical candidate gene or candidate gene-by-  
850 interaction hypotheses for major depression across multiple large samples.  
851 *American Journal of Psychiatry* **176**, 376-387 (2019).
- 852 58 Zuk, J., Benjamin, C., Kenyon, A. & Gaab, N. Behavioral and neural correlates of  
853 executive functioning in musicians and non-musicians. *PloS one* **9**, e99868  
854 (2014).
- 855 59 Medina, D. & Barraza, P. Efficiency of attentional networks in musicians and non-  
856 musicians. *Heliyon* **5**, e01315 (2019).
- 857 60 Vaag, J., Saksvik-Lehouillier, I., Bjørngaard, J. H. & Bjerkeset, O. Sleep  
858 difficulties and insomnia symptoms in norwegian musicians compared to the  
859 general population and workforce. *Behavioral sleep medicine* **14**, 325-342  
860 (2016).
- 861 61 Jansen, E., Helleman, H., Dreschler, W. & de Laat, J. Noise induced hearing loss  
862 and other hearing complaints among musicians of symphony orchestras.  
863 *International archives of occupational and environmental health* **82**, 153-164  
864 (2009).
- 865 62 Finkel, D. & Bravell, M. Genetic influences on lung function contribute to  
866 subsequent age changes in motor and cognitive function. *Behavioral Genetics*  
867 (2019).
- 868 63 van den Elzen, N. *et al.* The Power of Music: Enhancing Muscle Strength in  
869 Older People. *Healthcare (Basel)* **7**, doi:10.3390/healthcare7030082 (2019).
- 870 64 Haegens, S. & Golumbic, E. Z. Rhythmic facilitation of sensory processing: a  
871 critical review. *Neuroscience & Biobehavioral Reviews* **86**, 150-165 (2018).
- 872 65 Tung, J. Y. *et al.* Efficient replication of over 180 genetic associations with self-  
873 reported medical data. *PloS one* **6**, e23473 (2011).

- 874 66 Mas-Herrero, E., Marco-Pallares, J., Lorenzo-Seva, U., Zatorre, R. J. &  
875 Rodriguez-Fornells, A. Individual differences in music reward experiences. *Music*  
876 *Perception: An Interdisciplinary Journal* **31**, 118-138 (2013).
- 877 67 Sowiński, J. & Dalla Bella, S. Poor synchronization to the beat may result from  
878 deficient auditory-motor mapping. *Neuropsychologia* **51**, 1952-1963 (2013).
- 879 68 Oikkonen, J. *et al.* A genome-wide linkage and association study of musical  
880 aptitude identifies loci containing genes related to inner ear development and  
881 neurocognitive functions. *Molecular Psychiatry* **20**, 275, doi:10.1038/mp.2014.8  
882 <https://www.nature.com/articles/mp20148-supplementary-information> (2014).
- 883 69 Povel, D.-J. & Essens, P. Perception of temporal patterns. *Music Perception: An*  
884 *Interdisciplinary Journal* **2**, 411-440 (1985).
- 885 70 Gordon, R. L. *et al.* Musical rhythm discrimination explains individual differences  
886 in grammar skills in children. *Developmental Science* **18**, 635-644 (2015).
- 887 71 Wieland, E. A., McAuley, J. D., Dilley, L. C. & Chang, S.-E. Evidence for a rhythm  
888 perception deficit in children who stutter. *Brain Lang* **144**, 26-34 (2015).
- 889 72 Woods, K. J., Siegel, M. H., Traer, J. & McDermott, J. H. Headphone screening  
890 to facilitate web-based auditory experiments. *Attention, Perception, &*  
891 *Psychophysics* **79**, 2064-2072 (2017).
- 892 73 Macmillan, N. A. & Creelman, C. D. *Detection theory: A user's guide.*  
893 (Psychology press, 2004).
- 894 74 Durand, E. Y., Do, C. B., Mountain, J. L. & Macpherson, J. M. Ancestry  
895 Composition: A Novel, Efficient Pipeline for Ancestry Deconvolution. *bioRxiv*,  
896 010512, doi:10.1101/010512 (2014).
- 897 75 Henn, B. M. *et al.* Cryptic distant relatives are common in both isolated and  
898 cosmopolitan genetic samples. *PLoS One* **7**, e34267 (2012).
- 899 76 Consortium, G. P. A global reference for human genetic variation. *Nature* **526**, 68  
900 (2015).
- 901 77 consortium, U. K. The UK10K project identifies rare variants in health and  
902 disease. *Nature* **526**, 82 (2015).
- 903 78 Browning, S. R. & Browning, B. L. Rapid and accurate haplotype phasing and  
904 missing-data inference for whole-genome association studies by use of localized  
905 haplotype clustering. *The American Journal of Human Genetics* **81**, 1084-1097  
906 (2007).
- 907 79 Loh, P.-R., Palamara, P. F. & Price, A. L. Fast and accurate long-range phasing  
908 in a UK Biobank cohort. *Nature genetics* **48**, 811 (2016).
- 909 80 Watanabe, K., Taskesen, E., van Bochoven, A. & Posthuma, D. FUMA:  
910 Functional mapping and annotation of genetic associations. *bioRxiv*,  
911 doi:10.1101/110023 (2017).
- 912 81 Vernot, B. *et al.* Excavating Neandertal and Denisovan DNA from the genomes  
913 of Melanesian individuals. *Science* **352**, 235-239, doi:10.1126/science.aad9416  
914 (2016).
- 915 82 Hujoel, M. L. A., Gazal, S., Hormozdiari, F., van de Geijn, B. & Price, A. L.  
916 Disease Heritability Enrichment of Regulatory Elements Is Concentrated in  
917 Elements with Ancient Sequence Age and Conserved Function across Species.  
918 *Am J Hum Genet* **104**, 611-624, doi:10.1016/j.ajhg.2019.02.008 (2019).

919 83 The Genomes Project, C. *et al.* A global reference for human genetic variation.  
920 *Nature* **526**, 68, doi:10.1038/nature15393  
921 [https://www.nature.com/articles/nature15393 - supplementary-information](https://www.nature.com/articles/nature15393-supplementary-information) (2015).  
922

923  
924  
925  
926  
927  
928  
929  
930  
931  
932  
933

## FIGURES

**Figure 1. Manhattan plot of GWAS results for rhythm.** Results are shown for 606,825 research participants with 23andMe who responded Yes (N=555,660) vs. No (N=51,165) to the question “Can you clap in time to a musical beat?”, controlling for age, sex, top 5 PC’s for ancestry, and genotype platform. The x-axis shows chromosomal position and the y-axis shows  $-\log_{10}$  p-values). 68 loci surpassed the threshold for genome-wide significance of  $p < 5 \times 10^{-8}$  (dotted horizontal line). For illustration purposes, we only included 500,000 SNPs with  $p < 0.1$

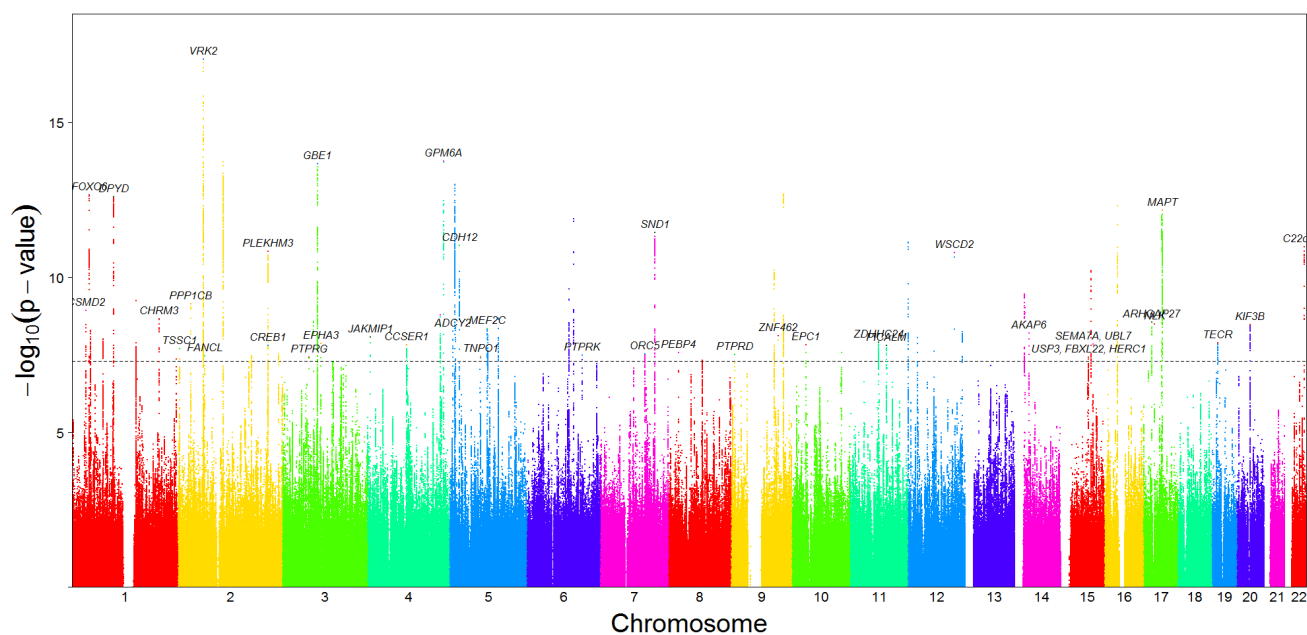

934



935 **Figure 2. Gene expression profiles for genes associated with rhythm in 53 tissue**  
936 **types from the GTEx database.** Gene property analysis was conducted in FUMA on  
937 the MAGMA gene-based results, in which the average expression per gene was added  
938 as a co-variate to the model. Associations with rhythm were significantly enriched in  
939 brain tissue compared to other tissues (-log<sub>10</sub> p-values are on y-axis, with type on x-  
940 axis).

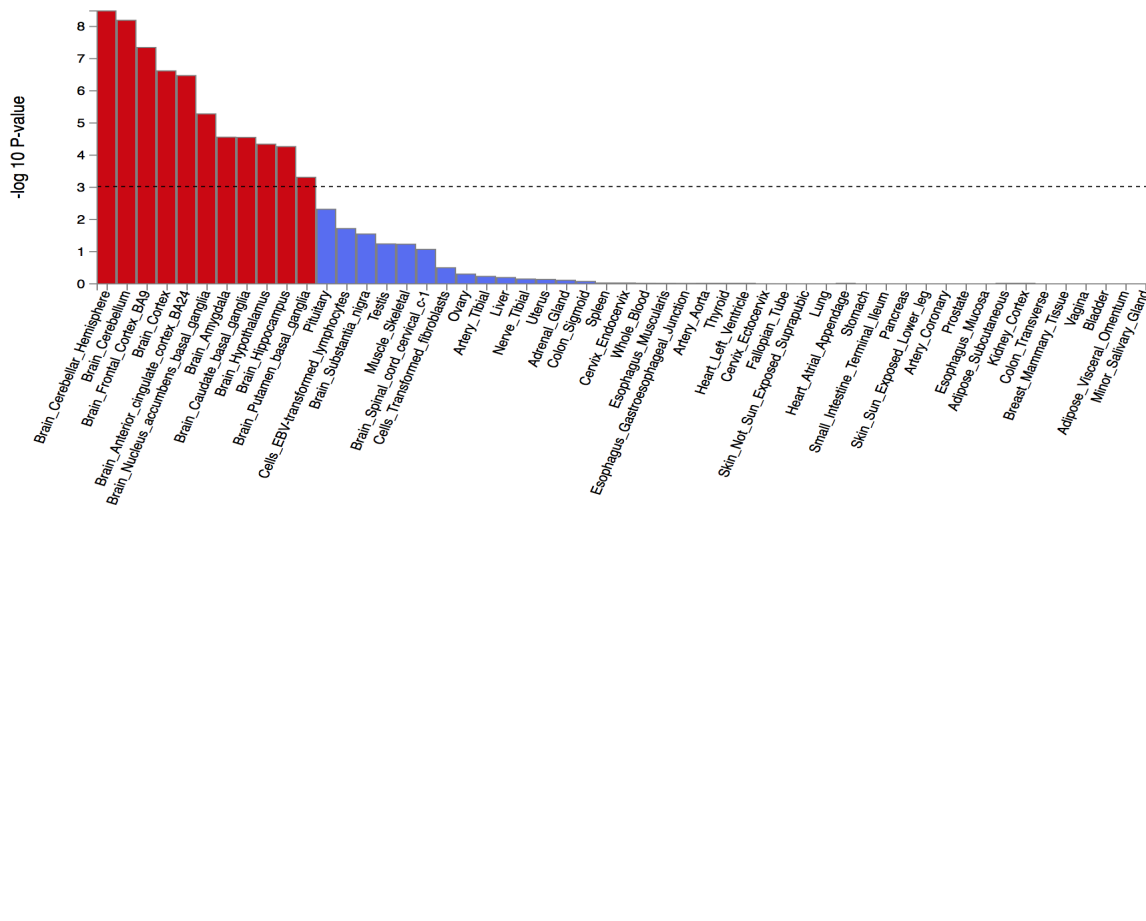

941  
942  
943  
944

945 **Figure 3. Polygenic score of rhythm predicts presence of musician-related**  
946 **keywords in electronic health record (EHR) biobank.** With weights derived from the  
947 23andMe GWAS, we applied polygenic scores (PGS) for rhythm to genomic data from  
948 N=864 individuals in Vanderbilt's BioVU whose EHR contained "musician" and related  
949 keywords, and compared to a control sample of N=66,577 (See Supplementary Note).  
950 PGS-rhythm were higher for musician vs. controls (OR=1.3) but did not predict 3  
951 negative-control traits, shown here.  
952

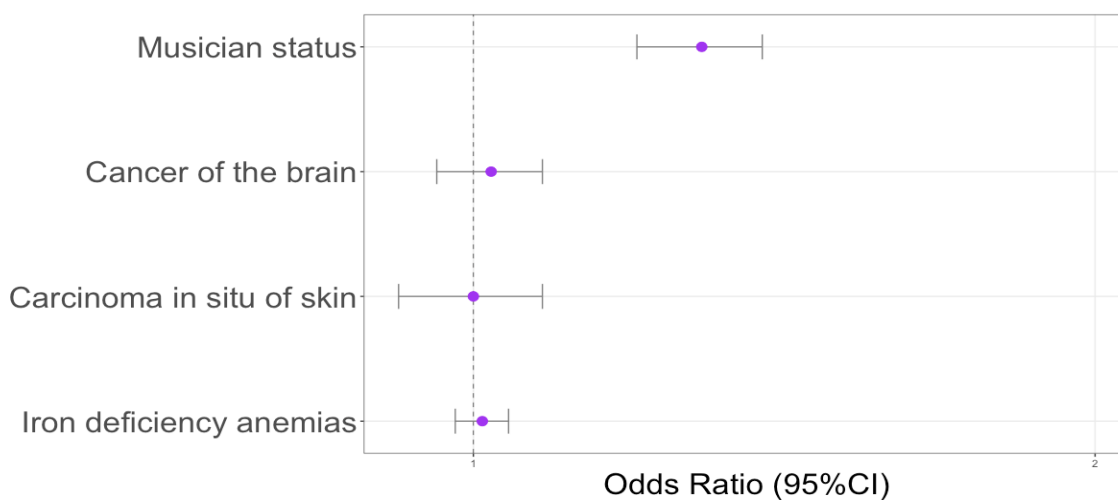

953  
954

955 **Figure 4. Selected results from the cross-trait genetic correlations analysis.**  
956 Rhythm summary statistics were significantly genetically correlated with several health,  
957 cognitive, emotion, and circadian phenotypes in our analysis comparing rhythm to traits  
958 available in LDHub. Full results are presented in Supplementary Table 13. The y-axis is  
959 the rg correlation, the bars represent standard errors and the p-values are also  
960 indicated.  
961

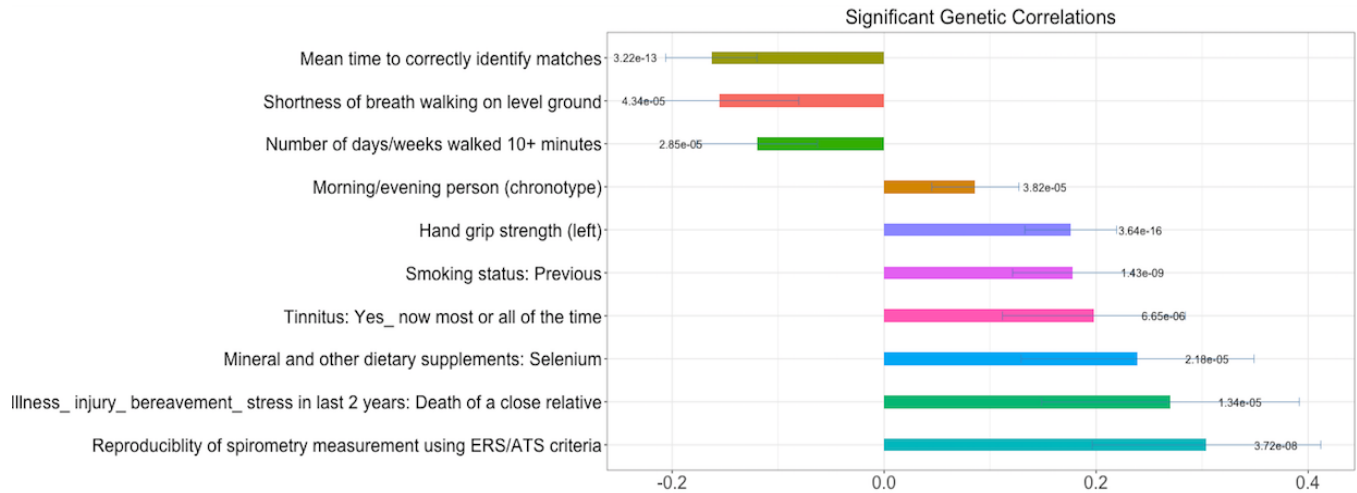

962  
963

964  
965  
966  
967  
968  
969  
970

## Tables

Table 1. Number of participants in each rhythm phenotype group, broken down by sex and age range in the GWAS sample.

| Phenotype group<br>(response to Clap-<br>to-beat question) | Total N | Males  | Females | 0 to 30<br>years old | 30 to 45<br>years old | 45 to 60<br>years old | 60 years old<br>and over |
|------------------------------------------------------------|---------|--------|---------|----------------------|-----------------------|-----------------------|--------------------------|
| <b>Yes (cases)</b>                                         | 555660  | 226188 | 329472  | 57898                | 135168                | 150939                | 211655                   |
| <b>No (controls)</b>                                       | 51165   | 23998  | 27167   | 5186                 | 12909                 | 13312                 | 19758                    |

971  
972  
973  
974

975 Table 2. Genomic loci associated with rhythm after adjusting for intelligence and traits  
 976 with which they have been previously associated (loci in pink do not exist in GWAS  
 977 catalog)  
 978

| SNPs after IQ cojo | chr | p-value     | GWAS catalog (yes/no) | GWAS catalog                                                                                                                                |
|--------------------|-----|-------------|-----------------------|---------------------------------------------------------------------------------------------------------------------------------------------|
| rs34762587         | 1   | 2.21584E-13 | no                    |                                                                                                                                             |
| rs2635634          | 5   | 9.96339E-12 | no                    |                                                                                                                                             |
| rs12913592         | 15  | 6.59873E-11 | no                    |                                                                                                                                             |
| rs2061843          | 1   | 1.08739E-09 | no                    |                                                                                                                                             |
| rs4443239          | 4   | 1.5082E-09  | no                    |                                                                                                                                             |
| rs1901739          | 5   | 2.15026E-09 | no                    |                                                                                                                                             |
| rs8079923          | 17  | 3.11892E-09 | no                    |                                                                                                                                             |
| rs7501911          | 17  | 3.99553E-09 | no                    |                                                                                                                                             |
| rs2284901          | 14  | 7.46306E-09 | no                    |                                                                                                                                             |
| rs10978661         | 9   | 9.75689E-09 | no                    |                                                                                                                                             |
| rs4263335          | 4   | 9.25137E-09 | no                    |                                                                                                                                             |
| rs7939759          | 11  | 1.45292E-08 | no                    |                                                                                                                                             |
| rs9710427          | 19  | 1.26321E-08 | no                    |                                                                                                                                             |
| rs12638746         | 3   | 1.56044E-08 | no                    |                                                                                                                                             |
| rs2505344          | 10  | 1.6844E-08  | no                    |                                                                                                                                             |
| rs6548147          | 2   | 2.0951E-08  | no                    |                                                                                                                                             |
| rs10885458         | 12  | 2.56522E-08 | no                    |                                                                                                                                             |
| rs10877461         | 10  | 2.61599E-08 | no                    |                                                                                                                                             |
| rs1996148          | 8   | 2.90685E-08 | no                    |                                                                                                                                             |
| rs12056186         | 7   | 2.93356E-08 | no                    |                                                                                                                                             |
| rs7856850          | 9   | 3.38293E-08 | no                    |                                                                                                                                             |
| rs4704043          | 5   | 3.49958E-08 | no                    |                                                                                                                                             |
| rs43182            | 3   | 4.50456E-08 | no                    |                                                                                                                                             |
| rs7875397          | 9   | 2.21728E-13 | no                    |                                                                                                                                             |
| rs2018545          | 14  | 3.58572E-10 | no                    |                                                                                                                                             |
| rs7002174          | 8   | 4.75329E-08 | no                    |                                                                                                                                             |
| rs34863893         | 5   | 8.60406E-10 | no                    |                                                                                                                                             |
| rs7297439          | 12  | 5.07484E-09 | no                    |                                                                                                                                             |
| rs72826882         | 17  | 2.58837E-09 | no                    |                                                                                                                                             |
| rs7625774          | 3   | 3.12812E-09 | no                    |                                                                                                                                             |
| rs848293           | 2   | 1.01057E-17 | yes                   | depression, neuroticism, schizophrenia                                                                                                      |
| rs62340585         | 4   | 2.2504E-14  | yes                   | neuroticism, schizophrenia, highest math class taken                                                                                        |
| rs10168817         | 2   | 1.83859E-14 | yes                   | reaction time, worry, pneumonia, phonic sneeze reflex, reaction time, HIV-1 viral set point                                                 |
| rs10779987         | 3   | 2.04673E-14 | yes                   | hand grip strength                                                                                                                          |
| rs10875125         | 1   | 3.43636E-13 | yes                   | educational attainment, schizophrenia, ASD, ADHD, MDD                                                                                       |
| rs4792891          | 17  | 7.06239E-13 | yes                   | general cognitive ability, depressed affect, neuroticism                                                                                    |
| rs1468701          | 7   | 2.72542E-12 | yes                   | intelligence                                                                                                                                |
| rs9626920          | 22  | 9.91369E-12 | yes                   | self-reported risk-taking behaviour, smoking status, dupuytren's disease                                                                    |
| rs764299           | 2   | 1.47E-11    | yes                   | educational attainment, highest math class taken, cognitive performance                                                                     |
| rs1426371          | 12  | 1.34602E-11 | yes                   | extraversion, worry                                                                                                                         |
| rs7586405          | 2   | 7.19E-10    | yes                   | heel bone mineral density                                                                                                                   |
| rs55678522         | 1   | 2.81431E-09 | yes                   | glioma, non-glioblastoma glioma, highest math class taken, general cognitive ability, educational attainment, intelligence                  |
| rs6087848          | 20  | 3.75408E-09 | yes                   | inflammatory bowel disease, Crohn's disease, cognitive performance,                                                                         |
| rs13163173         | 5   | 6.08339E-09 | yes                   | platelet count, intelligence, depressive symptoms, subjective well-being, depressed affect, neuroticism, BMI, conscientiousness, depression |

|            |    |             |     |                                                                                                                                                                                                                                                                                                                                                                                                           |
|------------|----|-------------|-----|-----------------------------------------------------------------------------------------------------------------------------------------------------------------------------------------------------------------------------------------------------------------------------------------------------------------------------------------------------------------------------------------------------------|
| rs67264739 | 5  | 5.89821E-09 | yes | adolescent idiopathic scoliosis                                                                                                                                                                                                                                                                                                                                                                           |
| rs1596431  | 5  | 5.77642E-09 | yes | intelligence                                                                                                                                                                                                                                                                                                                                                                                              |
| rs12909047 | 15 | 1.46255E-08 | yes | caffeine metabolism (plasma 1,3, 7, -trimethylxanthine (caffeine)level)                                                                                                                                                                                                                                                                                                                                   |
| rs67816799 | 4  | 1.64433E-08 | yes | educational attainment                                                                                                                                                                                                                                                                                                                                                                                    |
| rs10932201 | 2  | 1.55342E-08 | yes | systolic blood pressure                                                                                                                                                                                                                                                                                                                                                                                   |
| rs526904   | 11 | 1.54544E-08 | yes | Alzheimer's disease, family history of Alzheimer's disease,                                                                                                                                                                                                                                                                                                                                               |
| rs13197257 | 6  | 2.77659E-08 | yes | reaction time, educational attainment, general cognitive ability, highest math class taken                                                                                                                                                                                                                                                                                                                |
| rs11692449 | 2  | 3.2277E-08  | yes | immature fraction of reticulocytes                                                                                                                                                                                                                                                                                                                                                                        |
| rs62014217 | 15 | 3.1548E-08  | yes | atrial fibrillation, urinary albumin excretion                                                                                                                                                                                                                                                                                                                                                            |
| rs476141   | 1  | 4.68634E-08 | yes | diabetic retinopathy                                                                                                                                                                                                                                                                                                                                                                                      |
| rs7715357  | 5  | 1.30965E-13 | yes | smoking status                                                                                                                                                                                                                                                                                                                                                                                            |
| rs11865086 | 16 | 5.94369E-13 | yes | blood protein levels, menarche(age at onset)                                                                                                                                                                                                                                                                                                                                                              |
| rs1536057  | 6  | 1.35469E-12 | yes | platelet distribution width, smoking status (ever vs. never smokers), smoking initiation (ever regular vs. never regular), anxiety/tension(special factor of neuroticism)                                                                                                                                                                                                                                 |
| rs1972582  | 12 | 7.90101E-12 | yes | chronic kidney disease, glomerular filtration rate(creatinine), blood metabolite levels, chronotype                                                                                                                                                                                                                                                                                                       |
| rs3780420  | 9  | 6.39377E-11 | yes | quantitative traits, platelet distribution width, platelecrit, platelet count                                                                                                                                                                                                                                                                                                                             |
| rs9385269  | 6  | 1.96812E-10 | yes | educational attainment, cognitive performance, intelligence, regular attendance at a pub or social club, Tourette's syndrome, educational attainment, bipolar disorder, highest math class taken, self-reported math ability, cognitive function, alcohol consumption (drinks per week), general risk tolerance, extremely high intelligence, autism spectrum disorder, QT interval, risk taking tendency |
| rs16837903 | 1  | 4.74528E-10 | yes | monocyte chemoattractant protein-1 levels, lung function                                                                                                                                                                                                                                                                                                                                                  |
| rs778353   | 2  | 3.01299E-08 | yes | heel bone mineral density                                                                                                                                                                                                                                                                                                                                                                                 |
| rs10497357 | 2  | 3.42377E-08 | yes | longitudinal change in brain amyloid plaque burden                                                                                                                                                                                                                                                                                                                                                        |
| rs2467452  | 12 | 9.8837E-09  | yes | automobile speeding propensity, chronotype, morning person                                                                                                                                                                                                                                                                                                                                                |
| rs6684973  | 1  | 1.01877E-08 | yes | schizophrenia, depression, smoking initiation, smoking status, alcohol consumption self-reported math ability, highest math class taken                                                                                                                                                                                                                                                                   |
| rs2819336  | 1  | 4.59116E-09 | yes | smoking cessation, smoking initiation, cognitive ability, intelligence, general cognitive ability, cognitive performance, age of smoking initiation, hypertension risk in short sleep duration, menarche (age of onset), red blood cell count, educational attainment, self-reported math ability, highest math class taken, attention deficit hyperactivity disorder, male-pattern baldness              |
