1  
2  
3  
4  
5  
6  
7  
8  
9  
10  
11  
12  
13  
14  
15  
16  
17  
18  
19  
20  
21  
22  
23  
24  
25  
26  
27  
28  
29  
30  
31  
32  
33  
34  
35  
36

## Unravelling the genetic architecture of musical rhythm: a large-scale genome-wide association study of beat synchronization

**Maria Niarchou<sup>1,2\*</sup>, Daniel E. Gustavson<sup>1,2</sup>, J. Fah Sathirapongsasuti<sup>3</sup>,  
Manuel Anglada-Tort<sup>4</sup>, Else Eising<sup>5</sup>, Eamonn Bell<sup>6</sup>, Evonne McArthur<sup>1</sup>,  
Peter Straub<sup>1</sup>, The 23andMe Research Team<sup>3^</sup>, J. Devin McAuley<sup>7</sup>, John A. Capra<sup>8</sup>,  
Fredrik Ullén<sup>9</sup>, Nicole Creanza<sup>10</sup>, Miriam A. Mosing<sup>11,9</sup>, David Hinds<sup>3</sup>,  
Lea K. Davis<sup>2,1,13,14,15\*†</sup>, Nori Jacoby<sup>4†</sup>, Reyna L. Gordon<sup>16,1,17,18\*†</sup>**

<sup>1</sup>Vanderbilt Genetics Institute, Vanderbilt University Medical Center, TN, USA

<sup>2</sup>Division of Genetic Medicine, Department of Medicine, Vanderbilt University Medical Center, TN, USA

<sup>3</sup>23andMe, Inc., Sunnyvale, CA, USA

<sup>4</sup>Computational Auditory Perception Research Group, Max Planck Institute for Empirical Aesthetics, Frankfurt, Germany

<sup>5</sup>Department of Language and Genetics, Max Planck Institute for Psycholinguistics, Nijmegen, Netherlands

<sup>6</sup>Department of Music, Trinity College Dublin, Dublin, Republic of Ireland

<sup>7</sup>Department of Psychology, Michigan State University, Michigan, USA

<sup>8</sup>Bakar Computational Health Sciences Institute and Department of Epidemiology & Biostatistics, University of California, San Francisco, CA, USA

<sup>9</sup>Department of Neuroscience, Karolinska Institutet, Sweden

<sup>10</sup>Department of Biological Sciences, Vanderbilt University, Nashville, TN, USA

<sup>11</sup>Melbourne School of Psychological Sciences, University of Melbourne, Australia

<sup>13</sup>Department of Biomedical Informatics, Vanderbilt University Medical Center, TN, USA

<sup>14</sup>Department of Psychiatry and Behavioral Sciences, Vanderbilt University Medical Center, TN, USA

<sup>15</sup>Department of Molecular Physiology and Biophysics, Vanderbilt University, TN, USA

<sup>16</sup>Department of Otolaryngology – Head & Neck Surgery, Vanderbilt University Medical Center, TN, USA

<sup>17</sup>Department of Psychology, Vanderbilt University, TN, USA

<sup>18</sup>Vanderbilt Brain Institute, Vanderbilt University, Nashville, TN, USA

<sup>^</sup>full list of authors in Acknowledgements

<sup>\*</sup>Correspondence to: Reyna L. Gordon ([reyna.gordon@alumni.usc.edu](mailto:reyna.gordon@alumni.usc.edu)), Lea Davis ([lea.k.davis@gmail.com](mailto:lea.k.davis@gmail.com)), Maria Niarchou ([maria.niarchou@vumc.org](mailto:maria.niarchou@vumc.org))

<sup>†</sup>Co-senior authors

37  
38  
39  
40  
41  
42  
43  
44  
45  
46  
47  
48  
49  
50  
51  
52  
53  
54  
55  
56  
57  
58

## Abstract

Moving in synchrony to a musical beat is a fundamental component of musicality. Here, we conducted a genome-wide association study (GWAS) to identify common genetic variants associated with beat synchronization in 606,825 individuals. Beat synchronization exhibited a highly polygenic architecture, with sixty-seven loci reaching genome-wide significance ( $p < 5 \times 10^{-8}$ ) and SNP-based heritability (on the liability scale) of 13%-16%. Heritability was enriched for genes expressed in brain tissues, and for fetal and adult brain-specific gene regulatory elements, underscoring the role of central nervous system biomarkers linked to the genetic basis of the trait. We performed validations of the self-report phenotype (through internet-based experiments) and of the GWAS (polygenic scores for beat synchronization were associated with patients algorithmically classified as musicians in medical records of a separate biobank). Genetic correlations with breathing function, motor function, processing speed, and chronotype suggest shared genetic architecture with beat synchronization and provide avenues for new phenotypic and genetic explorations.

## 59 Introduction

60 Our tendency to perceive, create, and appreciate rhythms in a variety of contexts  
61 (e.g., speech, music, movement) is a feature of the human experience<sup>1-3</sup>. Rhythmic  
62 patterns provide predictable and robust sensorimotor structure to human interactions<sup>4,5</sup>,  
63 helping guide our attention to communicatively important moments in time<sup>6,7</sup>. Even very  
64 young children are sensitive to the social and linguistic signals carried by rhythm<sup>8-10</sup>,  
65 thus it is not surprising that parents use rhythmic vocalizations and synchronous  
66 movement (e.g., lullabies and rocking) to interact with their infants from birth<sup>11,12</sup>.  
67 Rhythmic musical interactions in young children and across the lifespan<sup>13</sup> are structured  
68 around the percept of a stable periodic pulse, termed the “beat” in Western music and  
69 also present in music of other cultures<sup>1,14</sup> (though different musical cultures varies in the  
70 way they incorporate beats in musical structure; see<sup>15,16</sup>). While music in general and  
71 rhythmic structures in particular significantly vary from one culture to another<sup>16-18</sup>, there  
72 is preliminary evidence that hierarchical beat structure of most music is robust to  
73 cultural transmission<sup>2</sup> and indeed common in many types of music<sup>1</sup>.

74 *Beat perception and synchronization* (i.e. perceiving, predicting, and moving  
75 predictively in synchrony to a musical beat<sup>19</sup>) is an important feature of musical  
76 experiences across many human cultures and musical genres<sup>1,20</sup>. The predictive  
77 temporal mechanisms afforded by beat structure enhance general perceptual and  
78 learning processes in music, including melody perception and production, singing, and  
79 joint music-making<sup>3,6</sup>. Recent work showed that some features of rhythm perception and  
80 production (e.g., categorical rhythm perception) varies across listeners from different  
81 cultures<sup>14,20-22</sup>, the same studies showed considerable consistencies across cultures for

82 other features (for example preference for beat-based isochrony). Beat synchronization,  
83 and musicality in general, appear to have broad implications for society by supporting  
84 pro-social behavior<sup>11,23</sup> and well-being<sup>24</sup>. Many have proposed that beat perception and  
85 synchronization evolved in humans to support communication and group cohesion<sup>19,25–</sup>  
86 <sup>27</sup>.

87         Neuroimaging findings have highlighted auditory-motor networks in the brain  
88 underlying rhythm perception and production<sup>28</sup>, during which there is precise  
89 entrainment of neural oscillatory activity to musical signals, primarily involving motor  
90 planning areas and auditory regions of the brain, even during simple passive listening to  
91 music<sup>29</sup>. Neural mechanisms of entrainment, prediction, and reward work in concert to  
92 coordinate the timing of beat-related expectancies to musical signals during listening,  
93 playing, singing, and dance<sup>27</sup>.

94         Although most people are able to effortlessly detect and synchronize with the  
95 beat even without musical training<sup>4,19</sup>, there is still substantial inter-individual variability,  
96 *within* cultures, in the extent to which individuals can perceive and produce musical  
97 rhythms accurately<sup>30,31</sup>, including the temporal precision of coordinating movement with  
98 a musical beat<sup>32</sup>. These individual differences could be due in part to genetic variation,  
99 and thus genetic approaches can be used to gain a foothold on the biological basis of  
100 musicality in humans (with the definition of *musicality* broadly encompassing musical  
101 behavior, music engagement and musical skill per<sup>25</sup>). Indeed, twin-modelling and other  
102 family-based studies point to moderate heritability of rhythm-related traits such as  
103 duration discrimination<sup>33,34</sup>, rhythm discrimination<sup>35</sup>, isochronous sensori-motor  
104 production<sup>36</sup>, and off-beat detection<sup>37</sup>. Much less is known at the molecular level about

105 human genome variation underlying musicality<sup>38</sup> which to date has been investigated in  
106 relatively small samples<sup>34</sup>, due to the challenge of assessing musicality phenotypes in  
107 samples large enough to provide sufficient power to detect common variants with small  
108 effects (as expected for complex traits<sup>39</sup>). Large-scale genome-wide association studies  
109 (GWAS) of musicality traits are thus needed to advance this field.

110 Our understanding of the biological underpinnings of beat synchronization, from  
111 its genetic architecture to its neural instantiation and behavioral manifestation, requires  
112 complex multi-methodological approaches. For instance, post-GWAS approaches (i.e.,  
113 heritability enrichment of gene expression in central nervous tissues) can eventually be  
114 used to illuminate the relationship between the genetic architecture of music-related  
115 traits and patterns of neural activity reported in neuroscience studies.

116 Human tendencies to engage with music are beyond recreational; individual  
117 differences in beat perception and synchronization abilities and the strength of neural  
118 resources associated with rhythm are predictive of language and literacy skills<sup>40,41</sup> and  
119 are more generally related to cognition, motor function, and social coordination<sup>42</sup>. The  
120 underlying genetic architecture of beat synchronization may have clinical-translational  
121 relevance, both for characterizing risk (i.e. atypical or impaired rhythm appears to be  
122 associated with developmental speech-language disorders<sup>43</sup>) and for rhythm-based  
123 rehabilitation (i.e. for stroke and Parkinson's<sup>44</sup>; with other promising benefits of music on  
124 health under investigation<sup>45</sup>). Applying advanced genetic epidemiology methods<sup>46</sup> to  
125 musicality phenotypes data collected in large population samples will generate new  
126 avenues of research, allowing us to examine to what extent beat synchronization might

127 share genetic architecture with other traits, thus also highlighting common risk or  
128 protective effects with other health and cognitive traits.

129

130 *Summary of Approach.*

131 Here, we report a novel genome-wide interrogation of beat synchronization. Our  
132 approach was as follows: 1) We validated a subjective self-reported beat  
133 synchronization item (“Can you clap in time with a musical beat?”, referred to in this  
134 paper as the “target item”), in relation to measured beat synchronization and rhythm  
135 perception task performance, as a scalable and accurate phenotype for large-scale  
136 population-based studies. 2) We identified genomic loci and established a polygenic  
137 model of beat synchronization. We first conducted a genome-wide association study  
138 (GWAS) to identify common genetic variants associated with beat synchronization in  
139 606,825 individuals participating in research with the personal genetics company  
140 23andMe, Inc. We then validated the findings in a separate genetic sample associated  
141 with musicality in a health care context (in Vanderbilt’s BioVU database), by testing  
142 whether a cumulative sum of the genetic effects for beat synchronization detected in our  
143 GWAS (i.e., polygenic score), was significantly associated with algorithmically identified  
144 musicianship. We also estimated how much of the total phenotypic variance of beat  
145 synchronization could be explained by all variation across the genome (i.e., SNP-based  
146 heritability). 3) We further investigated the genetic architecture of beat synchronization,  
147 using partitioned heritability and gene set enrichment analyses, with a particular focus  
148 on genes that play a role in the central nervous system. We also evaluated the  
149 contribution to beat synchronization of genomic regions that have experienced

150 significant human-specific evolutionary shifts (since the divergence of humans and  
151 chimpanzees from their last common ancestor). 4) We explored shared genetic effects  
152 (pleiotropy) on beat synchronization and other traits, performing exploratory genetic  
153 correlation analysis including 764 complex traits for which a well-powered GWAS has  
154 been performed and deposited in LDHub<sup>47</sup>. We then used genomic Structural Equation  
155 Modelling (SEM) to characterize the relationship among the top associations between  
156 beat synchronization and health-related traits. Findings were further investigated on the  
157 phenotypic level in a separate experiment.

158

159 **Results**

160 ***Overview. Validating the self-reported beat synchronization phenotype***

161 In light of prior work suggesting that musicality and rhythm skills are complex  
162 traits that can be quantified with both objective (experiment-derived) assessment and  
163 subjective self-reported data<sup>48,49</sup>, we performed a series of validations of the self-report  
164 beat synchronization item (i.e., the single item “Can you clap in time with a music beat?”  
165 that was used in the genetic study), in relation to measured rhythm perception and beat  
166 production tasks. Both studies were administered in English for consistency. We also  
167 explored the relationship between task-based beat synchronization ability, a self-  
168 reported rhythm scale (from additional questionnaire items), and musicality. Study  
169 overviews and key results are summarized in Figure 1.

170

171



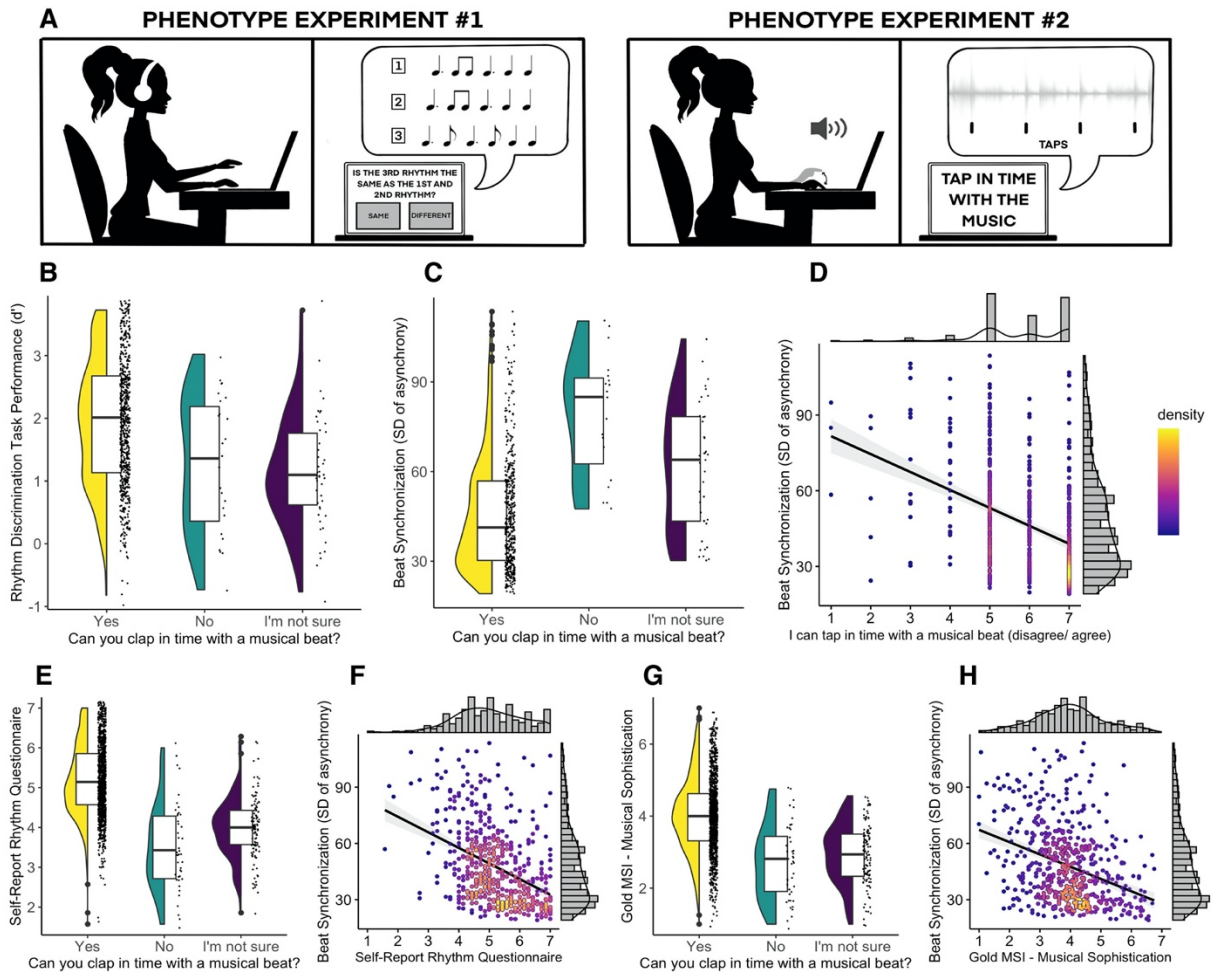

172

173

174

175 **Figure 1. Phenotype validation studies overview and results.** A) Schema of internet-based phenotype validation

176 studies. In phenotype experiment #1, participants performed a musical rhythm perception test and provided self-

177 report of the same target question in the GWAS study ("Can you clap in time with a musical beat"). In phenotype

178 experiment #2, participants performed beat synchronization tasks (which involved tapping to the beat of musical

179 excerpts) as well as responding to the same target question, in addition to a series of other questionnaires about their

180 musical engagement/ability and health traits. B) Phenotype Experiment 1 results show rhythm perception task

181 performance in association with responses to GWAS target question in N=724. C-H): Phenotype Experiment 2

182 results. C) Beat synchronization task performance in association with responses to the target question in n=542. D)

183 Beat synchronization task performance in association with responses to a similar self-report question asked on a

184 Likert scale, in n=542. E) Self-reported rhythm questionnaire (7-item scale) in association with responses to the target

185 question in N=1,412. F) Beat synchronization task performance in association with Self-reported rhythm

186 questionnaire in n=542. G) Gold-MSI (musical sophistication) in association with responses to the target question in

187 N=1,412. H) Beat synchronization task performance in association with Gold-MSI in n=542.

188 *Phenotype Experiment 1: Rhythm perception task performance.*

189 Phenotype experiment #1 was conducted in N=724 participants recruited

190 anonymously in Amazon's Mechanical Turk (see Table 1 for demographics).

191 Participants were asked the target question “Can you clap in time with a musical beat?”  
192 and performed a musical rhythm perception test (Supplementary Figure 1). See  
193 Methods and Supplementary Notes for experiment details. Briefly, in each of the 32  
194 trials of the task, participants had to judge whether a pair of rhythms were the same or  
195 different (see Figure 1A), following a standard procedure for assessing individual  
196 differences in musical perception ability<sup>31</sup> and utilizing rhythm sequences with simple  
197 (highly metrical) and complex (syncopated) rhythms<sup>50</sup>. The rhythm perception task  
198 yielded quantitative scores.

199 Individuals with better performance in the rhythm perception test (higher total  $d'$ )  
200 were more likely to answer Yes to the target item (i.e. that they can clap to the beat:  
201 OR(95%CI)=1.94 [1.28 to 3.01],  $p=0.002$ , McFadden’s  $R^2=0.39$ ), indicating there is  
202 approximately a 94% increase in the odds of answering ‘Yes’, per standard deviation  
203 increase in the rhythm perception test (see Figure 1B). In addition, individuals with  
204 higher scores on the subset of “simple” (i.e., more strongly beat-based) rhythm trials  
205 were more likely to answer that they can clap to the beat (OR(95%CI)=1.99[1.36-2.90],  
206  $p<0.001$ , McFadden’s  $R^2=0.40$ ).

207

### 208 *Phenotype Experiment 2: Beat synchronization task performance*

209 We conducted a second internet-based phenotype experiment (pre-registered in OSF)  
210 with  $N=1,412$ , to validate self-reported beat synchronization phenotype as a proxy for  
211 directly-measured beat synchronization ability (see Table 1 for demographics).  
212 Participants completed a questionnaire on musicality, health, and personality items, and  
213 were asked to tap in real time to the musical beat of 4 different musical excerpts (see

214 Supplementary Figure 2). Participants completed a questionnaire on musicality, health,  
215 and personality items, and were asked to tap in real time to the musical beat of 4  
216 different musical excerpts (see Supplementary Figure 2). Beat synchronization tapping  
217 accuracy was assessed similarly to lab-based studies<sup>32</sup>, but with a recently developed  
218 online-based technology that allowed us to precisely measure asynchrony of  
219 participants' taps along to music clips - i.e., REPP (Rhythm ExPeriment Platform; see<sup>51</sup>)  
220 for additional details on the experiment and pre-registered hypotheses (H1-H6), see  
221 Methods and Supplementary Notes. Key results of this study are summarized in Figure  
222 1 and Supplementary Table 1. Note that better *tapping accuracy* is reflected in lower  
223 *tapping asynchrony* scores, i.e., more accurate timing of taps in relation to the beat.

224 First, we tested pre-registered H1, showing that individuals who respond Yes to  
225 the target question (i.e., "Can you clap in time with a musical beat") had lower tapping  
226 asynchrony, OR = 0.28, [0.18, 0.43], McFadden  $R^2 = .67$  (Figure 1C). Tapping  
227 asynchrony was also negatively correlated with responses to a highly similar item ("I  
228 can tap in time to a musical beat") when asked on a seven-point Likert agreement scale  
229 (1= disagree; 7 = agree) instead of a "yes/no" answer,  $r = -.40$ , 95% CI [-0.47, -0.33]  
230 (H1a; Figure 1D). Similarly, individuals with significantly better self-reported rhythmic  
231 ability (based on responses to a seven-item questionnaire) were much more likely  
232 respond "yes" to the target question, OR = 7.34, 95% CI [4.79, 11.23], McFadden  
233  $R^2=.34$  (Figure 1E), and had lower tapping asynchrony,  $r = -.41$ , 95% CI [-0.47, -0.33]  
234 (Figure 1F) (H2). The results for H5 show that Musical sophistication scores from the  
235 Gold-MSI were also positively associated with the target question, OR=4.16, 95% CI  
236 [2.86, 6.04] (Figure 1G) and negatively correlated with tapping asynchrony  $r = -.34$ , 95%

237 CI [-0.42, -0.27] (Figure 1H). There was also no evidence that Musical Sophistication or  
238 prior/current musician status (measured with an additional item) interacted with the  
239 tapping asynchrony to predict responses to the target question (H6).

240 In addition, we demonstrated that although responses to the target question were  
241 associated with confidence judgements of one's own tapping performance assessed  
242 either immediately after the tapping trials, OR = 1.72, 95% CI [1.07, 2.76], or confidence  
243 assessed as a personality trait, OR = 1.75, 95% CI [1.02, 3.00], controlling for these  
244 confidence measures had no impact on the association with tapping asynchrony  
245 described above, OR = 0.28, 95% CI [0.17, 0.44], McFadden  $R^2$  = .69 (H3). These  
246 findings suggest that while the target question may encompass some self-reporting  
247 bias, the bias does not diminish its strong association with true beat synchronization  
248 ability. Moreover, all associations reported here were not altered when controlling for  
249 age, sex, and education (see Supplementary Table 1).

## 250 **Genomic study population**

### 251 **Beat Synchronization GWAS sample.**

252 The study population for the discovery GWAS consisted of N=606,825 unrelated  
253 participants of European ancestry (see Table 1 for demographics), who consented to  
254 participate in research with 23andMe, Inc. and answered Yes or No to the target  
255 question "Can you clap in time with a musical beat?" The majority of participants  
256 answered 'Yes' (91.57%) and 8.43% answered 'No'. See Methods for further sample  
257 details, genotyping, and quality control,.

### 258 **GWAS results and heritability estimation.**

259 GWAS was conducted using logistic regression under an additive genetic model,  
260 while adjusting for age, sex, the first five principal components from genetic data, and  
261 genotype platforms (see Methods). Sixty-eight “sentinel” SNPs (after two rounds of LD  
262 pruning, first at  $r^2=0.6$  and then at  $r^2=0.1$ , kb = 250) at 67 genomic loci (locus 28  
263 contains two independent sentinel SNPs) reached genome-wide significance ( $p < 5 \times 10^{-8}$ ;  
264 Figure 2, Table 2, and Supplementary Table 2), with a total of 6,115 SNPs passing the  
265 genome-wide significance threshold. QQ-plot is provided in Supplementary Figure 3.  
266 Local association plots at each locus are provided in the Regional Plots supplemental  
267 document.

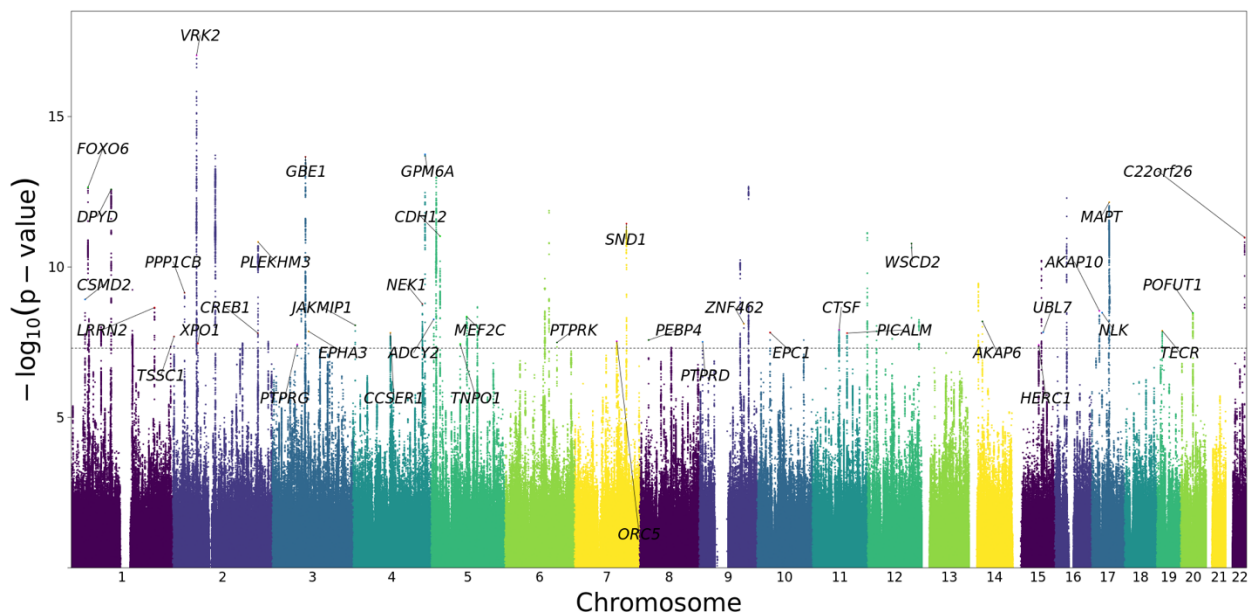

268  
269 **Figure 2. Manhattan plot of GWAS results of beat synchronization.** Results are shown for 606,825  
270 research participants with 23andMe who responded Yes (N=555,660) vs. No (N=51,165) to the question  
271 “Can you clap in time with a musical beat?”, controlling for age, sex, top 5 PC’s for ancestry, and  
272 genotype platform. The x-axis shows chromosomal position and the y-axis shows  $-\log_{10}$  p-values). Sixty-  
273 seven loci (68 sentinel SNPs, with one locus containing two independent sentinel SNPs) surpassed the  
274 threshold for genome-wide significance of  $p < 5 \times 10^{-8}$  (dotted horizontal line). For illustration purposes, only  
275 500,000 SNPs with  $p < 0.1$  are shown; gene symbols for sentinel SNPs are noted when FUMA provided  
276 a gene mapped to nearest sentinel SNP.  
277

278           The top associated locus was mapped at chromosome 2 close to *VRK2*  
279 (*Vaccinia Serine/Threonine Kinase 2*) and *FANCL* genes (rs848293,  $p=9.2 \times 10^{-18}$ ), a  
280 region that has been linked to sleep, depression<sup>52</sup> and schizophrenia<sup>53</sup>. Another strongly  
281 associated locus was around a SNP on chromosome 17 (rs4792891,  $p=7.07 \times 10^{-13}$ ) that  
282 maps to the Microtubule Associated Protein Tau (*MAPT*) gene, well-known for its  
283 associations with Parkinson's disease<sup>54</sup>. There was also a locus on the Mitogen-  
284 Activated Protein Kinase 3 (*MAPK3*) gene at 16p11.2, a region linked to risk for a  
285 number of neurodevelopmental disorders including autism and schizophrenia<sup>55</sup>, and to  
286 verbal memory and language<sup>56</sup>. Another significantly associated gene was the  
287 chromosome 4 Glycoprotein M6A (*GPM6A*), whose gene promoter contains a  
288 transcription factor binding site for *GATA2*, a gene previously related to music  
289 phenotypes<sup>34</sup>.

290           Linkage Disequilibrium Score Regression (LDSC)<sup>57</sup> analyses revealed that  
291 heritability estimates on the liability scale ranged from 13% to 16% when adjusted for a  
292 range of estimated population prevalence of poor rhythm skills (from 3.0% to 6.5%;  
293 Supplementary Table 3; see Supplementary Notes for explanation of prevalence  
294 estimates). The observed (unadjusted) genetic variance explained 5% ( $se=0.0002$ ) of  
295 the phenotypic variance in the beat synchronization trait, with an LD score regression  
296 intercept of 1.02 ( $se=0.01$ ).

297

### 298 **Gene-based analyses.**

299           Gene-based association analyses performed with MAGMA v1.08 yielded 125  
300 genes that surpassed the threshold of  $p < 2.6 \times 10^{-6}$  (Supplementary Table 4). The top two

301 genes are: *CCSER1*, in proximity to genes previously associated with musicality<sup>58</sup>, and  
302 *VRK2* (converging with the top locus identified in our SNP-based association analyses).

303 We also examined potential replication of genetic associations with musicality in  
304 humans from prior reports (29 genes were selected: 26 reported in<sup>58</sup> plus *GATA2* and  
305 *PCDH7*<sup>34</sup> and *UGT8*<sup>59</sup>). None of the genes reached statistical significance after  
306 genome-wide correction ( $p < 2.6 \times 10^{-6}$ ; Supplementary Table 5, Supplementary Notes),  
307 neither independently, nor as a gene-set ( $p = 0.30$ ), however, several are located near  
308 *CCSER1* in the 4q22-24 region.

### 309 **Gene set enrichment analyses**

310 We performed gene-set enrichment analyses using MAGMA, implemented in  
311 FUMA<sup>60</sup>. As hypothesized, associations with beat synchronization were significantly  
312 enriched among genes expressed in brain tissue compared to those expressed in non-  
313 brain tissues (Figure 3A); tissue-expression gene sets were based on GTEx data on 53  
314 different tissue types<sup>61</sup>. To further examine potential biological pathways associated with  
315 beat synchronization, we performed GO term and pathway enrichment analyses<sup>62,63</sup>.  
316 Three gene-sets out of 15,496 achieved statistical significance after Bonferroni  
317 correction (Supplementary Table 6). Results were associated with nervous system  
318 function, specifically: gene sets for synaptic membrane adhesion ( $p = 2.55 \times 10^{-8}$ ) and  
319 synaptic adhesion-like molecules ( $p = 1.90 \times 10^{-6}$ ), and MeCP2 regulation of transcription  
320 factors ( $p = 1.17 \times 10^{-6}$ ).

321

### 322 **Heritability Partitioning**

323 One advantage to SNP-based heritability estimation is the ability to partition  
324 heritability according to genomic properties, which provides insight into the types of  
325 genetic variation that contribute most to beat synchronization. To determine whether the  
326 heritability of beat synchronization is enriched for specific functional categories,  
327 stratified LDSC<sup>64</sup> was used to partition heritability (Supplementary Table 7). We  
328 hypothesized that SNPs falling into open chromatin regulatory regions (i.e., accessible  
329 to transcriptional machinery), and regions with human-specific variation, would be  
330 enriched for beat synchronization-associated variation. When assessing broad SNP  
331 annotation categories<sup>65</sup>, we found enrichment in regions conserved in mammals  
332 (regions of the genome identified under purifying selection<sup>66</sup>) (enrichment=15.8,  $p=1.19$   
333  $\times 10^{-12}$ ) and in regulatory regions marked by acetylation of histone H3 at lysine 9  
334 (H3K9ac; generally considered a marker for active chromatin; enrichment=8.0,  $p=1.85 \times$   
335  $10^{-8}$ ) and monomethylation of histone H3 at lysine 4 (H3K4me1; generally considered a  
336 marker for enhancers; enrichment=1.29,  $p=2.16 \times 10^{-5}$ ), supporting associations  
337 mediated by effects on gene regulation.

338 Given the results of the broad categories showing enrichment in markers of  
339 enhancers and active chromatin, we further used LDSC-Specifically Enriched Genes  
340 (LDSC-SEG) heritability partitioning as described in<sup>67</sup> to examine whether genes  
341 expressed in specific cell- or tissue-types (conditional to the other annotations) would  
342 show enrichment for beat synchronization-associated variants. When assessing tissue-  
343 specific annotations of active chromatin and enhancers (marked by H3K9ac, H3K27ac,  
344 DNase hypersensitivity sites and H3K4me1), we found that heritability was enriched in  
345 central-nervous-system- and skeletal muscle-specific regulatory regions; see



346 Supplementary Table 8 and Supplementary Figures 4, 5 and 6, for all cell-type specific,  
 347 multi-tissue chromatin, and multi-tissue gene expression results, respectively.  
 348 Enrichment in brain-specific regulatory elements, in several fetal and adult tissue-  
 349 specific elements as well as CNS-specific cell cultures, are shown in Figure 3B.  
 350  
 351

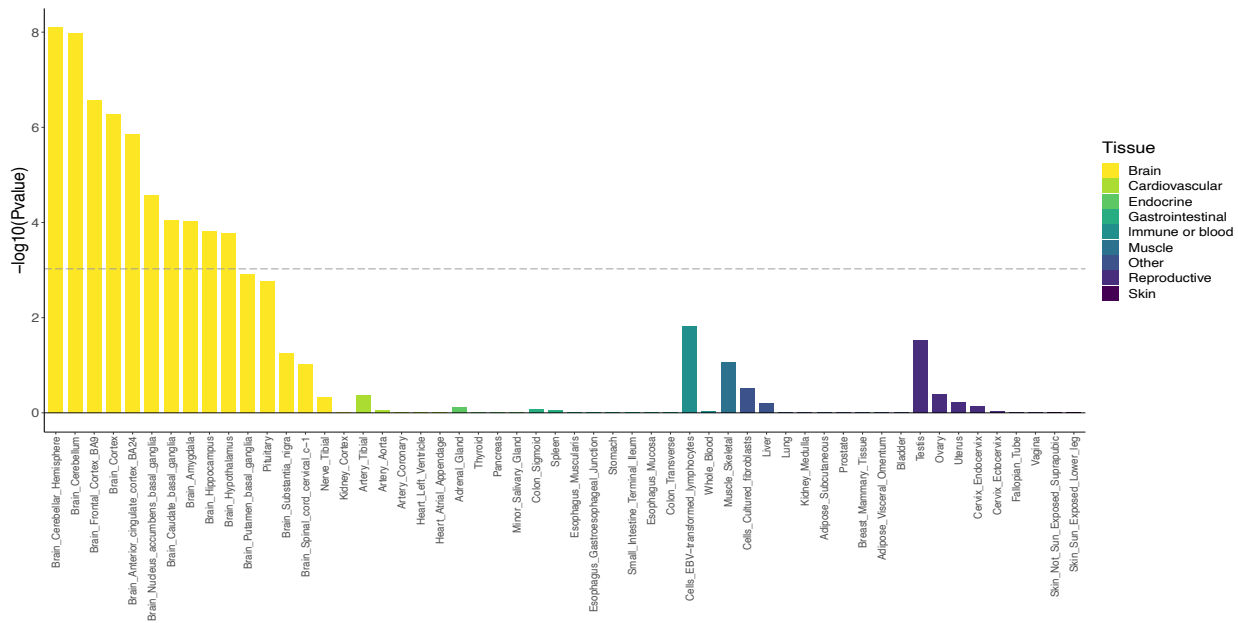

352  
 353 **Figure 3A. Genes associated with beat synchronization are enriched for expression in brain tissue.** Results of  
 354 MAGMA gene-property analysis are based on gene expression levels from GTEx in 53 tissues. Associations with  
 355 beat synchronization were significantly enriched in brain-expressed genes (-log<sub>10</sub> p-values are on the y-axis, with  
 356 tissue type on the x-axis). Dotted line shows p-value threshold for significant enrichment after Bonferroni correction  
 357 for testing 53 tissues.  
 358

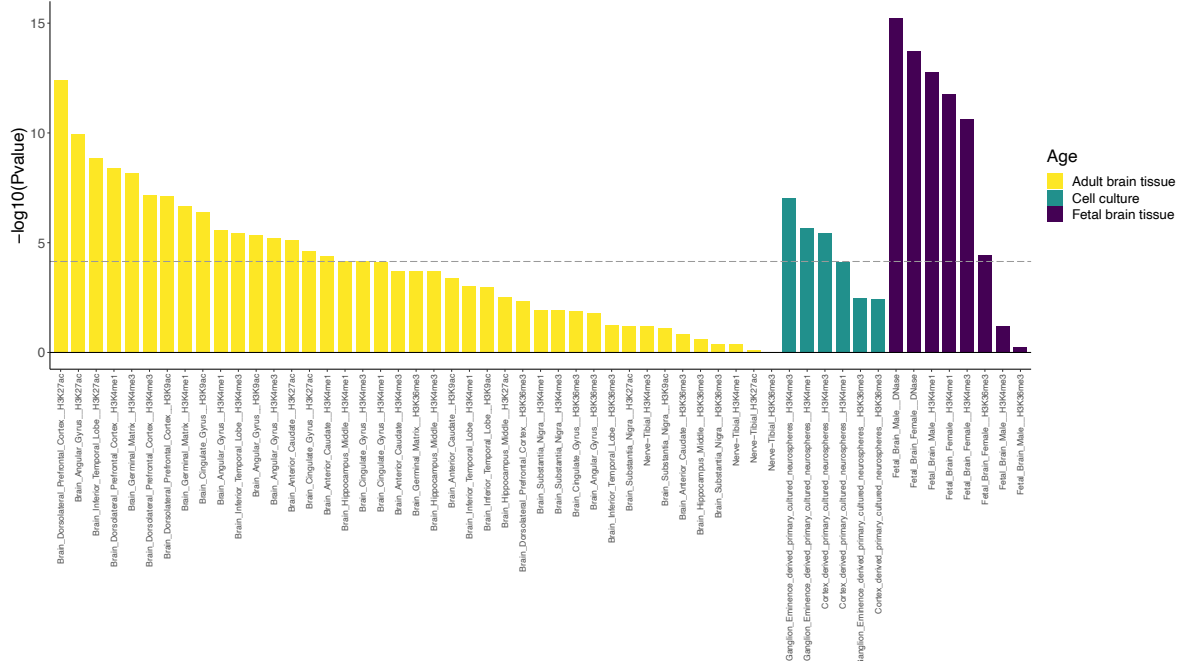

359  
 360 **Figure 3B. Partitioned heritability shows enrichment in brain-specific regulatory regions of the genome.**  
 361 Partitioned heritability analysis was performed with LDSC-SEG. Tissue-specific regulatory elements are marked by  
 362 histone 3 acetylation or DNase hypersensitivity (for open chromatin) and H3K4me1 (for enhancers). Regulatory  
 363 regions in adult brain tissues are shown in yellow, with regulatory elements in cell cultures in teal, and in fetal brain  
 364 tissue shown in dark purple. The graph shows  $-\log_{10}$  p-values are on y-axis, with tissue and marker type on x-axis.  
 365 The dotted line shows p-value threshold for significant enrichment after Bonferroni correction for number of gene sets  
 366 tested.  
 367

## 368 Human Accelerated Region and Neanderthal Introgression Stratified Heritability

### 369 Analyses

370 Given evolutionary hypotheses about the origins of rhythm<sup>4,19,68</sup>, we evaluated  
 371 the contribution of regions of the human genome that have experienced significant  
 372 human-specific shifts in evolutionary pressure, using stratified LDSC<sup>57,64</sup>. In particular,  
 373 we analyzed the contribution to beat synchronization heritability from variants in  
 374 genomic loci that are conserved across non-human species, but have elevated  
 375 substitution rate on the human lineage<sup>69</sup>. Many of these human accelerated regions  
 376 (HARs) play roles in human-enriched traits<sup>70</sup>, including cognition<sup>71</sup>. Two of the variants  
 377 significantly ( $p < 5 \times 10^{-8}$ ) associated with beat synchronization (rs14316, rs1464791) fall

378 within HARs (occurring within our locus 66 and locus 20, respectively). This is 11.2  
379 times more overlap than expected by chance ( $\mu = 0.178$  overlaps;  $p = 0.017$ , based on  
380 10,000 permutations). The rs1464791 variant is near *GBE1*, a gene associated with  
381 neuromuscular disease<sup>72</sup>, reaction time<sup>73</sup> and cognitive deficits<sup>74</sup>. Applying LDSC to  
382 consider the full set of association statistics, we find that genetic variants in HARs  
383 contribute 2.26 times more to the observed heritability of beat synchronization than  
384 would be expected if heritability were distributed uniformly across variants ( $p = 0.14$ ).  
385 Given the small number of common variants within HARs, this stratified heritability  
386 analysis is substantially underpowered (0.17% of variants considered are in HARs). The  
387 general agreement of these two approaches supports the enrichment of functional  
388 variation relevant to beat synchronization in HARs.

389 We also evaluated the contribution of genetic variants detected in the  
390 Neanderthal genome present in modern Eurasians due to interbreeding (hereafter  
391 “Neanderthal variants”) to the heritability of the beat synchronization phenotype.  
392 Eurasian genomes contain ~1.5-4% of DNA as a result from interbreeding with  
393 Neanderthals around 50,000 years ago. Heritability of beat synchronization was  
394 significantly depleted among Neanderthal variants (1.97-fold depletion,  $p = 0.001$ ).  
395 However, Neanderthal ancestry is significantly depleted in functional genomic regions  
396 overall<sup>75</sup>; therefore, the depletion of beat synchronization heritability in these regions is  
397 likely the result of the overall depletion for Neanderthal ancestry in functional regions of  
398 the genome. This is supported by a non-significant  $\tau_c^*$ , illustrating that Neanderthal vs.  
399 human variants do not provide unique heritability when conditioned on a broad set of  
400 regulatory elements (Supplementary Table 9, Methods).

401

402 **Polygenic scores for beat synchronization are related to musicality reported in a**  
403 **health care context**

404 We investigated whether the polygenic model of beat synchronization would be  
405 associated with musicality, by examining whether a weighted sum of the common  
406 alleles associated with beat synchronization, based on the GWAS results (also known  
407 as polygenic scores [PGS]), differentiated musicians from non-musicians.

408 Musicians were drawn from recent study<sup>76</sup> that had algorithmically identified musically  
409 active patients by the presence of specific musician-related keywords/regular  
410 expressions in clinical documentation collected in the electronic health record (see  
411 Methods and Supplementary Notes for details of automated search terms and chart  
412 review validation details). Briefly, 1,753 musician cases (who also had linked genetic  
413 data on file in the BioVU biobank) were compared with 65,147 genotyped controls. The  
414 PGS for beat synchronization was significantly associated with musician status (OR per  
415 SD increase in PGS, 1.26, 95%CI:1.20-1.33,  $p < 2 \times 10^{-16}$ , Nagelkerke's  $R^2=1\%$ )  
416 (Supplementary Table 10, Figure 4), consistent with our hypothesis that the beat  
417 synchronization phenotype captures a dimension of musicality. As expected, we did not  
418 find evidence for associations of the beat synchronization PGS with the negative control  
419 phenotypes (i.e., iron deficiency anemias, carcinoma in situ of skin, and cancer of the  
420 brain).

421

422

423

424

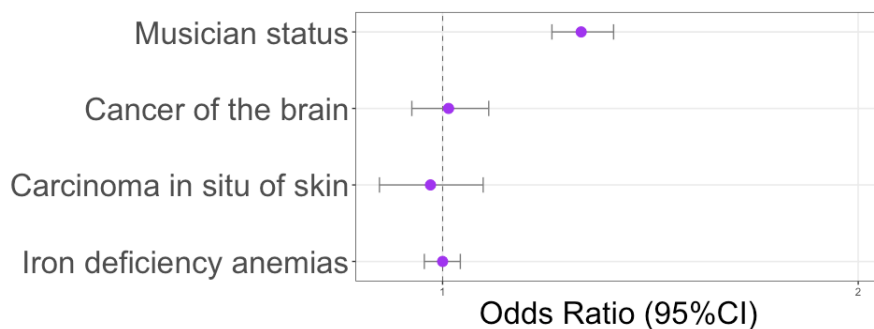

425  
426 **Figure 4. Polygenic score for beat synchronization predicts musicianship in**  
427 **electronic health record (EHR) biobank.** With weights derived from the 23andMe beat  
428 synchronization GWAS, we applied polygenic scores (PGS) for beat synchronization to  
429 genomic data from N=1,753 musicians identified in Vanderbilt's BioVU compared to a  
430 control sample of N=65,147 (See Supplementary Notes). PGS-beat synchronization  
431 was associated with musician status (OR=1.26) but not with the three negative-control  
432 traits.

433  
434  
435

## 436 **Cross-trait analyses**

437 *Genetic correlations.* To determine if beat synchronization shares genetic  
438 architecture with other traits, we tested genetic correlations<sup>57</sup> between beat  
439 synchronization and all 764 available traits in LDHub (v.1.9.2) using LDscore  
440 regression. This method is designed to show whether there is shared genetic variation  
441 linked to a particular trait (here, our beat synchronization trait) and traits measured in  
442 other GWAS studies. There were 31 statistically significant genetic correlations ( $p < 6.5 \times$   
443  $10^{-5}$ ) between beat synchronization and other traits after adjusting for multiple  
444 comparisons (Figure 5A, Supplementary Table 11). Briefly, top associations with beat  
445 synchronization included grip strength ( $r_g(\text{left})=0.18$ ,  $p=3.6 \times 10^{-16}$ ,  $r_g(\text{right})=0.16$ ,  
446  $p=6.91 \times 10^{-15}$ ); peak expiratory flow from both the UKBiobank ( $r_g=0.15$ ,  $p=2.11 \times 10^{-9}$ )  
447 and a second independent GWA study ( $r_g=0.11$ ,  $p=6.6 \times 10^{-8}$ ), shortness of breath when  
448 walking on level ground ( $r_g = -0.16$ ,  $p=0.43 \times 10^{-5}$ ), and several other breathing/lung  
449 function phenotypes (Supplementary Table 11). Processing speed measured as ‘mean  
450 time to correctly identify matches’ was negatively genetically correlated with beat  
451 synchronization ability ( $r_g=-0.16$ ,  $p=3.22 \times 10^{-13}$ ) (i.e., faster processing speed was  
452 associated with better beat synchronization). Additionally, smoking including ‘ever  
453 smoked’ ( $r_g=0.16$ ,  $p=2.5 \times 10^{-11}$ ) and ‘past tobacco smoking’ ( $r_g=-0.15$ ,  $p=4.6 \times 10^{-10}$ ),  
454 educational qualifications (O’ levels/GCSEs or equivalent) ( $r_g=0.16$ ,  $p=4.6 \times 10^{-7}$ ),  
455 evening chronotype ( $r_g=0.09$ ,  $p=3.8 \times 10^{-5}$ ) and tinnitus ( $r_g=0.20$ ,  $p=6.7 \times 10^{-6}$ ) were all  
456 positively associated with beat synchronization. While falling short of the correction for  
457 multiple testing, exposure to loud music was also correlated with a similar point estimate

458 ( $r_g=0.20$ ,  $p=2.0 \times 10^{-4}$ ) and could be due to a relationship between tinnitus and loud  
459 music exposure in the UKBB ( $r_g=0.30$ ,  $p=4.8 \times 10^{-6}$ )<sup>77,78</sup>.

460 *Genomic Structural Equation Modeling (SEM)*. Next, we conducted Genomic  
461 SEM<sup>79</sup> to examine whether the primary associations resulting from the exploratory  
462 analyses represented distinct genetic correlations with beat synchronization and/or a  
463 common set of genetic influences between beat synchronization and its top-associated  
464 traits, some of which are also known to be related among each other in prior research  
465 (e.g., musculoskeletal strength, lung function, and processing speed<sup>80–82</sup>). Analysis  
466 details are reported in the Supplementary Notes. Briefly, we included the four most  
467 significant traits from the LDHub analyses (grip strength, processing speed, smoking,  
468 lung function), creating latent factors where possible using other GWAS from these  
469 categories that were also significant in LDHub analyses (e.g., “Ever smoked”, “Smoking  
470 status: Previous”, “Light smokers: At least 100 smokes in lifetime”). The final model,  
471 displayed in Figure 5B, suggested that associations between beat synchronization,  
472 reaction time, grip strength, and lung function were explained by a common set of  
473 genetic influences, accounting for 16% of the total variance in the beat synchronization  
474 GWAS (the squared factor loading of 0.40 on the Common factor). Beat synchronization  
475 was genetically associated with smoking through a separate genetic association  
476 ( $r=0.16$ ; 95% CI [0.10, 0.23]), as smoking was uncorrelated with the other factors (see  
477 Supplementary Notes for more information).

478

A

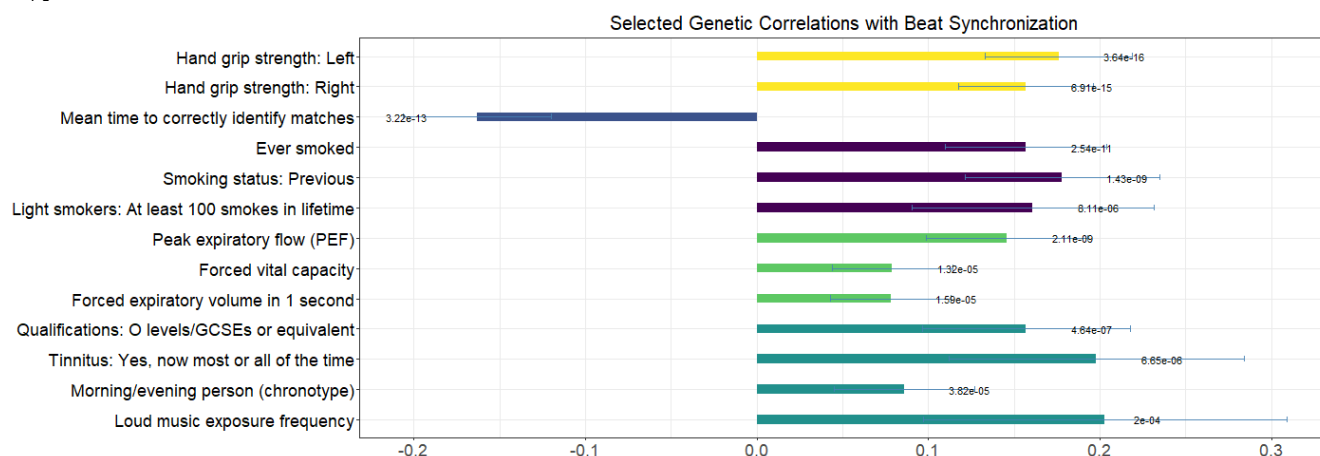

479  
480

B.

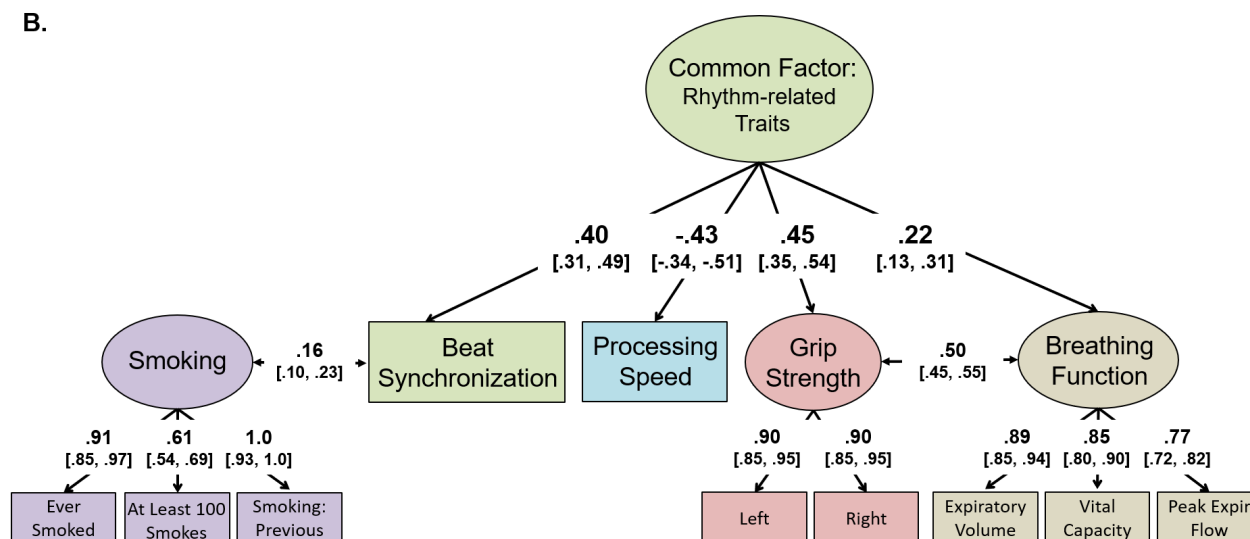

481  
482 **Figure 5. Selected results from the cross-trait genetic correlations analysis.** Beat synchronization  
483 summary statistics were significantly genetically correlated with several health, cognitive, emotion, and  
484 circadian phenotypes in our analysis comparing beat synchronization to traits available in LDHub. (A) The  
485 most significant genetic associations from exploratory analyses of LDHub traits, along with other selected  
486 traits. The y-axis is the rg correlation, the bars represent standard errors and the p-values are also  
487 indicated. Full results are presented in Supplementary Table 11. (B) The best-fitting genomic structure  
488 equation model of beat synchronization with GWAS of grip strength, breathing, smoking, and processing  
489 speed from LDHub. 95% confidence intervals of factor loadings and correlations are displayed in  
490 brackets. Results suggest that beat synchronization was associated with the other traits (except smoking)  
491 through a set of common genetic influences. Model fit:  $\chi^2(31) = 7136.92$ ,  $p < .001$ , CFI = .982, SRMR =  
492 .041.

493  
494  
495 *Common Factor GWAS: Rhythm-Related Traits.* Using genomic SEM, we

496 conducted a multivariate GWAS on the latent genetic factor from the Common variance  
497 in the model presented above and portrayed in Figure 5B, after excluding smoking from



498 the model and restricting to one set of summary statistics per domain (beat  
499 synchronization, processing speed, peak expiratory flow, grip strength [left]). The  
500 heritability of this latent genetic factor was .1068 (s.e.=0.0038). There were 270  
501 independent genome-wide significant sentinel SNPs, 97 lead SNPs, and 80 genomic  
502 risk loci (Supplementary Table 12). Heritability was enriched for genes expressed in  
503 cerebellum. See Supplementary Figures 7 and 8 for the Manhattan plot and tissue  
504 expression plots, and Supplementary Notes for more detail.

505

### 506 **Sensitivity analyses.**

507 We conducted sensitivity analyses to examine whether 1) the GWAS beat  
508 synchronization results are due to shared genetic effects with cognitive ability; 2) the  
509 GWAS genetic correlation results are driven by subtle residual population substructure;  
510 3) the inversion on chromosome 17q21 is associated with local ancestry in our study  
511 sample; and 4) the MAPT association is due to the presence of patients with  
512 Parkinson's in the sample. These analyses demonstrated that our results are robust to  
513 each of these potential biases (Supplementary Notes).

514

### 515 **Cross-trait phenotypic extension of genetic correlations.**

516 Data from Phenotype Experiment 2 was analyzed to examine whether the  
517 genetic associations between beat synchronization we uncovered from LDSC  
518 regression would be reflected in true phenotypic associations (H4 of the pre-  
519 registration). Poor tapping accuracy was weakly associated with a morningness  
520 preference ( $r=-.10$ ), more shortness of breath ( $r=-.16$ ), and smoking 20 or more

521 (lifetime) cigarettes ( $r=-.11$ ) (Supplementary Table 13). Association with tinnitus and  
522 loud music exposure were nonsignificant. In other words, individuals who had better  
523 beat synchronization task performance were more likely to report eveningness  
524 chronotype, less likely to report shortness of breath when walking on level ground  
525 (these associations go in the same direction of the genetic study). However, they were  
526 less likely to report ever smoking, and less likely to report tinnitus (these associations  
527 were opposite of what was found in the genetic study). The association with loud music  
528 exposure was nonsignificant. These associations with chronotype, shortness of breath,  
529 and smoking remained significant after controlling for age, sex and education, and/or  
530 removing professional musicians from the sample. Self-reported rhythm (assessed  
531 using the seven-item Rhythm scale) was only associated with smoking status ( $r=-.08$ )  
532 and loud music exposure ( $r=-.13$ ), even when controlling for covariates or focusing on  
533 non-musicians; however, these associations appeared in the opposite direction of the  
534 corresponding genetic associations. There was no evidence of interactions with musical  
535 sophistication or prior/current musician status for the H4 constructs, except that the  
536 association between loud music exposure and self-reported rhythm was weaker in  
537 individuals with who more actively performed music ( $p=.022$ ), though this effect would  
538 not survive a strict multiple test correction.

## 539 Discussion

540 This study demonstrates that common genetic variation plays a role in  
541 synchronizing to a musical beat, complementing prior evidence of innate human rhythm  
542 sensitivity<sup>4,19</sup>. We conducted a GWAS of beat synchronization in more than half a million  
543 individuals surveyed within 23andMe, Inc., with the resulting summary statistics and  
544 post-GWAS analyses representing a significant advancement of our understanding of  
545 the genomic basis of a musicality phenotype. Heritability of beat synchronization is  
546 enriched for functions of the central nervous system on a number of dimensions (gene  
547 expression in brain tissue, genes involved in synaptic function, and more generally,  
548 genes involved in neural development and brain-specific regulatory regions of the  
549 genome). We successfully applied polygenic scores for beat synchronization to a  
550 separate cohort to predict musicianship, showing that the GWAS taps into the larger  
551 construct of musicality. Our findings point to pleiotropy between beat synchronization  
552 and several other types of biological functions (breathing function, motor function,  
553 processing speed, and chronotype), paving the way to a better understanding of the  
554 biological underpinnings of musicality and its health relevance.

555 Of course, the interpretation of these results depends upon a valid phenotype. In  
556 a series of phenotypic experiments, we demonstrate that self-reported beat  
557 synchronization/rhythm measures can be used in large-scale population-based studies  
558 as suitable proxies for measuring individual differences in beat synchronization ability.  
559 Our findings indicate that the “target question” phenotype used in the genetic study  
560 (*Can you clap in time with a musical beat?*) was highly related to beat synchronization  
561 task performance (i.e., accuracy in tapping along to musical excerpts). We show that

562 the GWAS phenotype is also significantly associated with the following: rhythm  
563 perception task performance<sup>50</sup>, a self-report Rhythm scale (generated from an additional  
564 questionnaire), and a well-established assessment of musical sophistication<sup>48</sup>. These  
565 results also converge with findings from prior work in small samples that show shared  
566 variance among task performance of beat synchronization, rhythm perception, and  
567 musical engagement/training<sup>49,83–86</sup>. The phenotypic associations were robust to  
568 demographic factors (age, sex, level of education) and confidence (both as a  
569 personality trait and as confidence in assessing one's own tapping accuracy), and were  
570 not driven by the presence of professional musicians in the sample. More generally, our  
571 findings indicate that people were able to self-report their rhythm abilities accurately  
572 using other similar questionnaire items (i.e., scale from a seven-item Rhythm  
573 questionnaire and a Likert scale single item both predict tapping accuracy). These  
574 phenotype validation studies represent critical groundwork enabling self-reported  
575 rhythm traits to be deployed online in large-scale population genetic cohorts where  
576 participant assessment time and technology are constrained.

577 Beat synchronization exhibited a highly polygenic architecture, with sixty-seven  
578 loci surpassing the threshold for genome-wide significance. The top-associated locus  
579 (at sentinel SNP rs848293) mapped to *VRK2*, a protein kinase with multiple spliced  
580 isoforms expressed in the brain that was previously associated with behavioral and  
581 psychiatric phenotypes (i.e. depression<sup>52</sup>, schizophrenia<sup>53</sup> and developmental delay<sup>87</sup>),  
582 suggesting a biological connection between rhythm and neurodevelopment. The SNP-  
583 based heritability of beat synchronization on the liability scale was moderate, ranging  
584 from 13 to 16%, similar to heritability estimates of other complex traits (e.g., chronotype

585 GWAS<sup>88</sup>) and consistent with moderate heritability estimates of musical rhythm abilities  
586 reported in twin studies<sup>35-37</sup>.

587 We used complementary methods (tissue-specific GTex-based gene set  
588 enrichment analysis in MAGMA, and partitioned heritability in tissue-specific expressed  
589 genes and regulatory regions with LDSC-SEG) to examine potential mechanisms linking  
590 genetic variation to neural architecture of the beat synchronization trait. Collectively,  
591 results showed enrichment of the heritability of beat synchronization in many brain  
592 tissues including cerebellum, dorso-lateral prefrontal cortex, inferior temporal lobe, and  
593 several basal ganglia nuclei (including putamen, caudate, and nucleus accumbens).  
594 This pattern of results likely reflects a genetic contribution to subcortical-cortical  
595 networks underlying musical rhythm perception and production<sup>28</sup>. It is important to note  
596 that because of the highly overlapping gene expression and chromatin signatures  
597 between related tissues, with differences reflecting both function and cell type  
598 composition, these results do not yet allow us to directly compare the respective  
599 contributions different enriched brain regions. Rather, enrichment of brain-tissue-  
600 specific enhancers and active-regulatory regions, and enrichment of expression in brain  
601 tissue, suggest that regions of the genome involved in regulation of gene expression  
602 play a role in the beat synchronization trait. Moreover, partitioning heritability chromatin  
603 results showed an enrichment in both fetal and adult brain tissues, suggesting that beat  
604 synchronization may be the result of neurodevelopmental or basic brain processes.  
605 Gene set enrichments were also observed for synaptic function and MeCP2  
606 transcription regulation in the nervous system. Taken together, these results are a  
607 building block towards understanding how genes influence neural processes during

608 beat perception and production, complementing results obtained with neuroimaging  
609 methods<sup>89–94</sup>.

610 Insights about the evolution of rhythm traits are suggested by the occurrence of  
611 two of the beat-synchronization-associated loci in human-accelerated regions (HARS)  
612 of the genome. In particular, rs1464791 is an expressive quantitative trait locus (eQTL)  
613 that regulates expression of *GBE1* in multiple tissues, including adrenal gland and  
614 muscle<sup>61</sup>; *GBE1* is also linked to neuromuscular disease<sup>72</sup> and reaction time<sup>73</sup>. HARS  
615 are involved in many functions, so it is difficult to explicitly link their accelerated  
616 evolution to beat synchronization. It is too early to tell whether the overlap between beat  
617 synchronization-associated loci and those two HARS supports evolutionary theories  
618 about music (e.g., groups moving to a beat in synchrony during joint music-making  
619 and/or temporal coordination of movement between parents and young children have  
620 been posited to exert selective pressures in early humans by enhancing group social  
621 cohesion and family bonding<sup>27,95</sup>). The contribution of the genetic architecture of  
622 musculo-skeletal systems and motor function to beat synchronization is further  
623 suggested by enriched heritability of SNPs that are enhancers located in  
624 musculoskeletal-tissue-specific regulatory regions of the genome, as well as our  
625 findings of genetic correlations between grip strength and beat synchronization.

626 We derived polygenic scores (PGS) generated from the beat synchronization  
627 GWAS to a separate genetically informative sample (in a healthcare biobank),  
628 demonstrating that beat synchronization PGS's are significantly associated with  
629 musicianship. These findings suggest that the genetic signature of musical beat  
630 synchronization is more widely tied to the biology of musicality, a finding corroborated in

631 Phenotype Experiment 2 by phenotypic associations between musical engagement,  
632 measured beat synchronization (tapping accuracy), and self-reported rhythm ability.  
633 These results also align with literature on other related biological bases of musicality  
634 and rhythm, i.e., brain network activity during rhythmic tasks and the effects of plasticity-  
635 related effects of musical expertise<sup>28</sup>.

636         Moreover, our findings are promising for future large-scale genomic  
637 interrogations using comprehensive music phenotyping yielding continuous musicality  
638 variables (whether questionnaire-based<sup>48,96</sup> or measured aptitude-based variables<sup>35</sup>).  
639 When this new field examines GWAS results on other heritable musicality traits such as  
640 pitch discrimination and music training, future work can examine potential genetic  
641 correlations between beat synchronization and other musical traits as predicted by  
642 family-based studies<sup>33,34,38,97</sup>. While the current data show a clear connection between  
643 the beat synchronization and broader musicality at the phenotypic and genetic levels,  
644 further genomic investigation in well-powered samples is needed to disentangle the  
645 *specificity* of genetic influences on rhythm from more general genetic influences on  
646 musical ability.

647         The ability to move in synchrony to a musical beat encompasses beat perception  
648 and extraction, motor periodicity, meter perception, and auditory-motor entrainment (see  
649 Glossary in Supplementary Notes and<sup>4,28,98</sup>). Despite this complexity, beat is a highly  
650 frequent feature of many musical systems<sup>1,3,27</sup>. For Western participants, beat  
651 perception and production does not depend on musical training or a particular genre of  
652 music (note that deficits in beat synchronization are not linked to lack of music  
653 exposure<sup>99</sup>). A limitation of the current work is the restriction of the genetic sample to a

654 European ancestry (due to GWAS methodology constraints); investigating beat  
655 synchronization, musicality, and cross-trait correlations in populations of non-European  
656 ancestry should be a future priority for capturing the spectra of musicality in a wider  
657 range of ethnic, cultural and socio-economic contexts (see<sup>100</sup>). It is important to note  
658 that early research on individual differences in music ability in the early 1900's was  
659 pursued not only using what we now recognize as highly culturally biased assessments,  
660 but also explicitly through the lens of eugenics (see<sup>101</sup>), similar to early research on  
661 individual differences in cognition. We strongly condemn the design and intent of those  
662 studies, and emphasize that even a robust polygenic model for beat synchronization (or  
663 musicality in general) cannot make deterministic predictions about a specific individual's  
664 actual ability; rather, these models are probabilistic at the group level<sup>102</sup>, and explain  
665 only a small part of the etiology of complex traits<sup>103</sup>. Furthermore, new knowledge on  
666 the genetic basis of musicality must be used ethically and fairly for research discovery  
667 and never for harm (e.g., preventing children's access to musical activities).

668 We replicated previous findings implicating location 4q22.1 in musicality-related  
669 traits<sup>33,59</sup> (*CCSER1* was the top-associated gene in our MAGMA analysis), but did not  
670 find support for previous gene associations from a set of genes that was drawn from  
671 prior candidate-gene, linkage, and GWAS studies with relatively small samples<sup>58</sup>. This is  
672 potentially due to well-known methodological problems with these methods particularly  
673 when applied to complex traits in small samples<sup>104</sup>. Without a second comparably sized  
674 GWAS available within which to conduct replication of the loci discovered in the primary  
675 GWAS, we were still able to demonstrate generalizability of these results by showing  
676 that PGS for beat synchronization predicts a musical trait in a separate biobank sample.



677 The genetic architecture of beat synchronization also remained virtually unchanged  
678 after conditioning the analyses on known GWAS markers of intelligence, in line with twin  
679 studies showing specific genetic effects of rhythmic aptitude, over and above any  
680 common genetic influences on rhythm and intelligence<sup>36,105</sup>.

681 Our multi-pronged genetic cross-trait explorations revealed pleiotropic effects  
682 between beat synchronization and several traits, including types of biological rhythms  
683 (breathing-related phenotypes and circadian chronotypes); these were verified by  
684 phenotypic replication of selected associations in an additional experiment. We initially  
685 discovered novel genetic correlations between beat synchronization and specific health  
686 and cognitive traits (i.e., increased breathing function, greater grip strength, and faster  
687 processing speed) consistent with prior phenotypic and behavioral genetic studies of  
688 cognition, sensory processing, and musicality<sup>97,106–108</sup>. We further explored these novel  
689 associations with genomic SEM, which revealed common genetic variance among beat  
690 synchronization and breathing function, musculoskeletal function, and cognitive function  
691 (with the latter three traits previously shown to be genetically interrelated during the  
692 aging process<sup>80,81</sup>). Poor beat synchronization could be tied to certain health risks  
693 during aging, in light of other genetic and epidemiological work showing that lung  
694 function decline predicts later declines in motor function and psychomotor speed in  
695 older adults<sup>109–112</sup>. We replicated the positive genetic correlation between better beat  
696 synchronization ability (accuracy in tapping to the beat of musical excerpts) and lung  
697 capacity in our phenotype validation study, where we also found that better beat  
698 synchronization task performance was related to lower likelihood of shortness of breath.

699           Thus, the LDSC and genomic SEM results suggest that beat synchronization  
700 shares common biology with a constellation of related health traits, converging with the  
701 growing literature on the overlapping biomechanical and perceptual mechanisms of  
702 rhythms harnessed during synchronization, communication, muscle tensioning, and  
703 breathing. The cerebellum in particular governs certain neural mechanisms shared  
704 among these processes and plays important roles in the control of coordinated  
705 movement, balance, respiration, dance, and even rhythm perception during passive  
706 listening to music<sup>29</sup>. The rhythm-related traits multi-variate GWAS obtained with  
707 Genomic SEM resulted in 80 genome-wide significant loci and enriched heritability of  
708 genes expressed in Cerebellar tissue. Such phenomenon reflecting potentially shared  
709 biology across a broad range of physiological and developmental processes has been  
710 the focus of recent frameworks in which the ontogeny of rhythm, and more specifically  
711 of sensitivity to beat synchronization, are been hypothesized to play a role very early in  
712 life in its potential connections with maternal breathing and locomotion<sup>113</sup>. Experiments  
713 in infants demonstrate that parental singing and rocking help to regulate newborn  
714 breathing<sup>114</sup> and that infants reap the socio-emotional benefits of their caregivers' beat-  
715 synchronous interactions even before they possess the motor coordination to  
716 synchronize precisely to music<sup>115</sup>. Respiratory and upper limb movements have been  
717 found to be functionally synchronized during vocalization such that listeners can detect  
718 nuances of oscillatory body movement in an unseen speaker's vocalizations even when  
719 highly constrained<sup>5</sup>. "Beat gestures" in speech involve the cerebellum<sup>116</sup> and are  
720 inextricably linked to respiration, upper limb movement, and postural control, all of which  
721 may be biomechanically related to tapping or clapping to music.

722 In addition, we identified a new relationship between chronotype and beat  
723 synchronization (genetic correlation between eveningness and beat synchronization  
724 GWAS) and replicated this phenotypically in our pre-registered Phenotype Experiment  
725 in which we found that individuals who self-identified as ‘evening people’ tended to tap  
726 more accurately to music. This particular association was not moderated by musical  
727 sophistication scores, and survived sensitivity analysis in which professional musicians  
728 were removed. These results complement recent evidence of the increased prevalence  
729 of eveningness in musicians<sup>117</sup>, indicating that the relationship between chronotype and  
730 musicianship cannot solely be explained by environment (i.e., nocturnal job demands of  
731 professional musicians), but that also other shared biological factors may play a role.

732 Our case/control GWAS has allowed us to effectively identify genetic alleles  
733 differentially associated with normative beat synchronization vs. beat impairment,  
734 complementing neural evidence of beat synchronization networks<sup>83,85,86,99</sup>. Future  
735 genetic studies could also examine beat synchronization task performance as a  
736 continuous trait, either through self-report or online-based methods directly measuring  
737 participants’ tapping accuracy, such as demonstrated in Phenotype Experiment 2 using  
738 REPP<sup>51</sup>. Prior literature on liability threshold models has shown that case-control GWAS  
739 of complex traits yield similar results to those obtained through continuous phenotypic  
740 measures (for example, the genetic architecture of continuous measures of psychiatric  
741 symptoms is highly similar to the genetic architecture of cases versus controls<sup>118</sup>).  
742 Finally, although our GWAS was based on self-report, previous studies of other health  
743 traits based on self-report have effectively replicated associations from studies using

744 validated assessments, indicating that a powerful sample size can overcome limitations  
745 arising from phenotyping error<sup>119</sup>.

746         Taken together, our results advance knowledge of the biological basis of beat  
747 synchronization by identifying genomic regions associated with individual differences in  
748 beat synchronization, estimating its cumulative SNP-based heritability, successfully  
749 applying a polygenic score model in a separate genetic sample, and exploring the  
750 enrichment of heritability in genes tied to central nervous system function. Movement in  
751 synchrony with a musical beat is a fundamental feature of music, and sensitivity to the  
752 beat emerges early in development, supporting childhood development in numerous  
753 ways<sup>3,11,40,43</sup> and with importance over the lifespan<sup>120</sup>. By elucidating the genetic  
754 architecture of beat synchronization, we were able to identify the source of some of the  
755 phenotypic variation observed in the general population and reveal health relevance  
756 through cross-trait analyses. This study also provides a solid foundation for future  
757 exploration of how specific genetic variants contribute to neural mechanisms of  
758 entrainment, prediction, and reward harnessed during musical interactions.

## 759 **Methods**

### 760 **Phenotype validation studies**

#### 761 ***Phenotype Validation Experiment 1.***

##### 762 *Overview.*

763 Phenotype Validation Experiment 1 was designed to determine if self-reported rhythm  
764 abilities measured with the question used in the GWAS (i.e., ‘Can you clap in time with  
765 a musical beat?’) would be associated with task-based rhythm perception performance.  
766 The study was conducted in Amazon’s Mechanical Turk and received ethical approval  
767 from the Columbia University Institutional Review Board; participants gave their written  
768 informed consent. We selected the Beat-based Advantage paradigm as a rhythm  
769 discrimination (perception) test due to its design of stimuli with simple and complex  
770 meter<sup>121</sup> and prior history investigating individual differences in rhythm perception in a  
771 variety of brain and behavioural studies in adults and children with typical and atypical  
772 development<sup>30,50,122,123</sup> as well as feasibility for internet-based adaptation. A  
773 questionnaire (self-report questions) was administered prior to the perception task, to  
774 avoid biasing participant self-report responses by how they perceived their own task  
775 performance. See Supplementary Notes for additional details on procedure and self-  
776 report questionnaire.

777

##### 778 *Participants*

779 The study sample was N=724 individuals who consented and passed a common  
780 headphone check<sup>124</sup> that guarantees good listening conditions and the ability to follow  
781 basic instructions; this test also effectively filters out bots. Participants (333 females;

782 387 males; 4 “other”) were 18-73 years old (mean = 36.1 years, SD=10.9) with 0-45  
783 years of self-reported musical experience (mean 3.7 years, SD=5.8), representing an  
784 average degree of musical experience (see norms in<sup>48</sup>); demographics are reported in  
785 Table 1 (note that n=2 did not report their age).

786

### 787 *Rhythm Perception Task*

788 Stimuli for the rhythm perception task consisted of 32 rhythms drawn from prior  
789 work<sup>50,121</sup>. For each participant, we randomized with probability of one half the  
790 occurrence of “simple” rhythms (strong beat-based metrical structure and generally  
791 easier to discriminate) and “complex” rhythms (weaker metrical structure due to  
792 syncopation and generally more challenging to discriminate). Each rhythm was  
793 presented using pure tone stimuli in one of 6 frequencies (294, 353, 411, 470, 528, and  
794 587 Hz, selected at random), and one of 4 durations (ISI of 220, 230, 240, and 250 ms).  
795 Each trial consisted of 3 rhythms separated by 1500 ms of silence. The two first  
796 presentations were always identical, and in half of the trials (counterbalanced) the third  
797 rhythm was also identical (standard condition); in the other half of the trials, the rhythm  
798 differed by having one interval swapped (deviant condition). The pairings and structure  
799 of standard and deviant trials were taken from<sup>50</sup>. Participants were instructed that in  
800 each trial, they would listen to the series of three rhythms (the first two were always  
801 identical, and the third could be the same or different), and they had to indicate if the  
802 third rhythm was the same or different (see Supplementary Figure 1). Additional  
803 technical details are provided in the Supplementary Notes.

804

805 *Data analysis.*

806 *Self-report.* Responses to the target question ‘Can you clap in time with a  
807 musical beat?’ were as follows: n=654 (90.3%) participants answered ‘Yes’, n=25  
808 (3.5%) answered ‘No’ and n=45 (6.2%) answered “I’m not sure.” Regarding an  
809 additional self-report question ‘Do you have a good sense of rhythm?’, n=503(67%)  
810 answered ‘Yes’, 102(14%) answered ‘No’ and n=117(16%) answered ‘I don’t know’.  
811 n=488 answered ‘Yes’ to both questions; the tetrachoric correlation between these two  
812 self-report questions was  $r=0.73$ .

813 *Rhythm perception test.* Responses to the rhythm perception test were analysed  
814 using signal detection theory<sup>50,125</sup>; this method is appropriate for discrimination tasks  
815 where the participant has to categorize stimuli along some dimension with the resulting  
816  $d'$  values the strength of detection of the signal relative to noise.  $d'$  values were  
817 calculated on the 32 test trials. As expected from prior work<sup>50,126</sup>, individuals performed  
818 better at discriminating simple rhythms (mean  $d'= 1.98$ , SD =0.91) than complex  
819 rhythms (mean  $d'=1.43$ , SD =0.97) ( $t(724)=11.11$ ,  $p<2.2 \times 10^{-16}$ , Cohen’s  $d=0.58$ ).

820 To examine whether the target question was related to the objective performance  
821 on the rhythm perception test, we performed a logistic regression analysis in which the  
822 clap-beat target question (Yes vs. No) was the outcome and quantitative scores on the  
823 rhythm perception test performance (standardized  $d'$  scores mean = 0, SD = 1) were the  
824 predictor. Covariates included age, education, and sex. McFadden’s  $R^2$  was also  
825 computed. We did not include ‘I’m not sure’ in the regressions, because this response  
826 was not available for data analysis in the GWAS. Given that the simple rhythms have a  
827 strong metrical structure that is known to facilitate detection and synchronization of the

828 beat<sup>50</sup>, we also tested whether performance on the simple rhythm trials predicted self-  
829 reported beat synchronization (i.e., those who responded Yes to the clap-beat  
830 question).

831

## 832 ***Phenotype Experiment 2.***

### 833 *Overview.*

834 The aims of Phenotype Experiment 2 were two-fold: 1) to validate self-reported  
835 beat synchronization phenotype as a proxy for objectively measured beat  
836 synchronization ability, and 2) to explore phenotypic associations between rhythm/beat  
837 synchronization and assorted traits found to be genetically correlated with beat  
838 synchronization. Phenotype Experiment 2 was pre-registered in OSF prior to data  
839 collection. This internet-based study consisted of a beat synchronization task to assess  
840 the accuracy of participants' tapping in time with musical excerpts, and a series of  
841 questionnaires assessing self-reported rhythm, musicality/music engagement, selected  
842 health traits, confidence as a personality trait, and demographics. We used REPP<sup>51</sup> to  
843 measure participants' tapping responses online with high temporal fidelity. The item  
844 from the GWAS study, "Can you clap in time with a musical beat?" with possible  
845 responses: Yes/No/I'm not sure, is referred to as the "target question."

846 We tested the following hypotheses: *H1*: Self-report responses to the target  
847 question will be correlated with beat synchronization task performance (i.e., accuracy of  
848 tapping to the beat of music), such that individuals who respond Yes to the "target  
849 question" are predicted to tap more accurately to the beat of musical excerpts (i.e., they  
850 will have lower standard deviation of asynchrony than individuals who respond No to the



851 target question). *H1a*: Self-report on a highly similar self-report question (“I can tap in  
852 time with a musical beat”) with responses on a 7-point agreement Likert scale are  
853 predicted to be correlated with tapping accuracy. *H2a*: The target question will be  
854 associated with broader rhythm ability/engagement (measured with a rhythm scale from  
855 other self-report questions). *H2b*: Beat synchronization task performance reflects  
856 broader self-reported rhythm ability/engagement. *H3*: To examine whether confidence  
857 (either as a personality trait or sureness in one’s own task performance) affects the  
858 reliability of self-reported beat synchronization. *H4*: Selected traits found to be  
859 genetically correlated with beat synchronization in the GWAS will be phenotypically  
860 correlated with beat synchronization task performance and the Rhythm Scale.  
861 Specifically: better beat/rhythm is correlated with evening chronotype (*H4a*), less  
862 shortness of breath (*H4b*), more tinnitus and loud music exposure (*H4c*), and more  
863 smoking (*H4d*); and that these associations would survive controlling for age, sex, and  
864 education (*H4e*). *H5*. Responses to the target question will be positively correlated with  
865 musical engagement measured with the Gold-MSI. *H6*. The associations in *H4* would  
866 interact with being a musician, or more generally, with musical engagement.

867

#### 868 *Participants.*

869 A total of N=1,412 individuals met participation criteria outlined in the pre-  
870 registration (including passing the attention check item and not abandoning the study  
871 before completion). The study took place in Amazon Mechanical Turk and all  
872 participants provided informed consent in accordance with the Max Planck Society  
873 Ethics Council’s approved protocol. Participants (728 females; 678 males; 6 prefer not

874 answer) were 18-77 years old (mean=36.3 years, SD=11.9) and had of 1-2 years of  
875 self-reported musical experience. To ensure that the tapping technology measured beat  
876 synchronization with high temporal fidelity, it was crucial that participants complied with  
877 instructions to perform the tapping task (e.g., using the laptop speakers instead of  
878 headphones, with minimal background noise, etc.), and also used hardware and  
879 software without any technical issues that would preclude the recording signal (e.g.,  
880 malfunctioning speakers or microphones, or the use of strong noise cancellation  
881 technology; see<sup>51</sup>). Thus, several precautions, including calibration tests and practice  
882 trials, were taken to make sure the tapping technology would work effectively, excluding  
883 cases that did not meet the requirements (see Supplementary materials for details). A  
884 subset of n=542 had appropriate hardware to complete all parts of the study (including  
885 the tapping tests). Questionnaires were administered in the full sample of participants.  
886 Sample demographics are reported in Table 1. Demographics of the participants that  
887 completed the tapping experiment was highly similar to the full sample, as shown in the  
888 table; furthermore, 65.3% of the full sample and 64.9% of tapping sample had a  
889 Bachelor's degree or higher.

890

#### 891 *Data collection for Phenotype Experiment 2.*

892 The first questionnaire included self-report items, including the “target question,”  
893 and also covering a variety of musical, health, and interest phenotypes. The health  
894 phenotype questions were chosen from phenotypes (chronotype, smoking, shortness of  
895 breath, tinnitus, and loud music exposure) found to be genetically correlated with beat  
896 synchronization in our genetic analyses. Rhythm questions were selected for their

897 particular relevance to various aspects of interacting/engaging with musical rhythm. The  
898 order of the questions was fixed for all participants. In addition, we used an attention  
899 check item<sup>127</sup> between item 10 and 11, in order to exclude fraudulent responders, such  
900 as computer bots or disengaged participants responding randomly to the experiments.  
901 The end-questionnaire consisted of items covering the following additional self-report  
902 topics: another question about being a musician, a task confidence rating question, a  
903 Confidence scale, a 16-item short version of the Gold-MSI<sup>48</sup> (items were chosen due to  
904 their high reliability scores: reliability omega = 0.92), and a Demographic questionnaire.  
905 Questionnaire items for Phenotype Experiment 2 are listed in the Appendix of the  
906 Supplementary Notes.

907 *Tapping technology.* Beat synchronization is particularly challenging to study with  
908 online research, where variability in participants' hardware and software can introduce  
909 all kinds of delay in latency and jitter into the recorded time stamps<sup>128,129</sup>. Here we used  
910 REPP (see<sup>51</sup> for full details and a validation study of the technology), a robust cross-  
911 platform solution for measuring sensorimotor synchronization in online experiments that  
912 has high temporal fidelity and can work efficiently using hardware and software  
913 available to most participants online. To address core issues related to latency and  
914 jitter, REPP uses a free-field recording approach: specifically, the audio stimulus is  
915 played through the laptop speakers and the original signal is simultaneously recorded  
916 with participants' tapping responses using the built-in microphone. The resulting  
917 recording is then analyzed using signal processing techniques to extract and align  
918 timing cues with high temporal accuracy.

919           *Beat synchronization task.* The beat synchronization task procedure consisted of  
920 three parts: calibration tests, practice phase, and main tapping phase. Participants  
921 started with the calibration tests, including a volume test to calibrate the volume of the  
922 laptop speakers to a level sufficient for detection by the microphone, a background  
923 noise test to make sure participants were in a quiet environment, and a tapping test to  
924 help participants practice how to tap on the surface of their laptop in the right level and  
925 location to be detected by the microphone. Participants were then presented with the  
926 practice phase, which consisted of four 15-second trials of isochronous tapping to a  
927 metronome beat (two with inter-onset interval of 500 msec and two with inter-onset  
928 interval of 600 msec). Following the practice phase, participants were presented with  
929 the main tapping task consisting of eight trials (4 musical excerpts, each played twice),  
930 with each trial 30 seconds long. The order of presentation of the practice trials and test  
931 trials was randomized for each participant.

932           The musical excerpts were drawn from the MIREX 2006 Audio Beat Tracking  
933 database in which musical excerpts had been annotated for beat locations by 30  
934 listeners who tapped along to the music<sup>130</sup>. We chose these four MIREX clips that  
935 represent different music genres with different tempos and tapping difficulty: track 1  
936 (“You’re the First, the Last, My Everything” by Barry White), track 3 (“El Contrapunto” by  
937 Los Mensajeros de La Libertad), track 7 (“Le Sacre du Printemps” by Stravinsky), and  
938 track 19 (“Possessed to Skate” by Suicidal Tendencies) of the MIREX training set  
939 (respectively). Based on the annotations in<sup>130</sup>, we identified the target beat locations  
940 from those consistently produced by the annotators. We performed kernel density  
941 estimation with a kernel width of 20 msec; this provided an estimate of the probability of

942 producing a response in any given time. The peaks of the probability density were  
943 located using Matlab's findpeaks function with the following parameters:  
944 'MinPeakHeight', 0.11/ts, 'MinPeakProminence', 0.11/ts, 'MinPeakDistance', 100 msec,  
945 where ts is the number of responses in the clip. Beat locations were extracted from the  
946 entire 30 seconds of the clip and used as the reference location for computing the  
947 asynchrony. To help participants find the beat and eliminate potential ambiguity of  
948 tapping at half- or double-time the tempo, a metronome marking the beats in the first 11  
949 seconds of the clip were added to the stimulus (as commonly used in this type of  
950 tapping paradigm). Additional technical details are provided in the Supplementary  
951 Notes, and Supplementary Figure 2 illustrates the instructions for participants.

952

953 *Data Analysis.*

954 **Beat synchronization task performance: Tapping accuracy analysis**

955 Let  $S_t$  and  $R_t$  be the stimulus and response onsets, respectively. In case of the  
956 metronome  $S_t$  are the metronome onset (practice phase) and for music clips  $S_t$  is the  
957 target beat location based on the annotations. We define the asynchrony as  $a_t = R_t - S_t$ .  
958 Based on prior work<sup>131</sup>, we chose the standard deviation of the asynchrony ( $\text{std}(a_t)$ ) as  
959 our main target interest variable, as this appears to be a robust measure of individual  
960 performance and tightly linked to musical abilities<sup>132</sup>. We used metronome onsets to  
961 mark the beat metric level in an unambiguous way<sup>133</sup>. We emphasize that the  
962 metronome onsets were only physically present during the beginning and end of each  
963 clip. We used only the participant-produced asynchronies during the epoch at beats in  
964 which the guiding metronome was *not* present, in order to test the ability of the

965 participants to synchronize to music without the metronome sounds (results were nearly  
966 identical when we included all onsets including the one were physical metronome  
967 onsets were present). For the main test scores, we used the asynchronies computed  
968 relative to the virtual beat locations computed from prior human annotators in MIREX.

### 969 **Regression analyses**

970 In accordance with the OSF preregistration, we examined whether responses to  
971 self-reported beat synchronization phenotype were associated with objectively-  
972 measured tapping accuracy, other self-reported measures of rhythm ability, confidence,  
973 and/or musical sophistication using logistic regression and McFadden's  $R^2$  (for H1, H2a,  
974 H3, and H5) and linear regression (for H1a and H2b). Likewise, we used linear  
975 regression to examine potential replication of cross-trait associations uncovered by  
976 genetic analyses (H4a-d), to examine whether musical background interacted with the  
977 above associations (H6). Analyses were conducted in R version 3.5.1<sup>134</sup>. As described  
978 in our preregistration, individuals were recruited using MTurk and were included unless  
979 they failed an attention check item or abandoned the experiment before completing the  
980 study (N=1,412). Usable tapping data was available for n=542 individuals. The majority  
981 of exclusions were due to technical reasons detected by REPP's signal processing  
982 pipeline during the practice trials (e.g., poor signal, noisy environment, wearing  
983 headphones, issues with laptop microphone, or people not tapping at all), but some  
984 additional subjects (n=19) were excluded for not having enough usable trials during data  
985 analysis. Missing covariates were handled using pair-wise deletion. Exclusion criteria  
986 are detailed in the Supplementary Notes.

987

988 **GWAS of beat synchronization.**

989 GWAS sample.

990 Genome-wide association study summary statistics were generated from data  
991 acquired by personal genetics company 23andMe, Inc. Phenotypic status was based on  
992 responses to an English-language online questionnaire in which individuals self-  
993 reported “Yes” (cases) or “No” (controls) to the question ‘Can you clap in time with a  
994 musical beat?’. Individuals who responded “I’m not sure” were excluded from the  
995 genomic dataset as their data was not available. The GWAS included a total of 555,660  
996 cases and 51,165 controls (total N=606,825, mean age(SD)=52.09(18.5),  
997 prevalence=92%), all of European ancestry; age range breakdown is provided in Table  
998 1. All individuals provided informed consent according to 23andMe’s human subject  
999 protocol, which is reviewed and approved by Ethical & Independent Review Services, a  
1000 private institutional review board (<http://www.eandireview.com>).

1001

1002 *Genotypes and QC.*

1003 The National Genetics Institute (NGI) performed the DNA extraction and  
1004 genotyping on saliva samples for the 23andMe GWAS. Overall, there were five  
1005 genotyping platforms and subjects were genotyped on only one of them. The v1 and v2  
1006 platforms had variants of the Illumina HumanHap550+ BeadChip, including  
1007 approximately 25,000 custom SNPs selected by 23andMe, with a total of about 560,000  
1008 SNPs. The v3 platform had variants of the Illumina OmniExpress+ BeadChip, with  
1009 custom content to improve the overlap with the v2 array, with a total of about 950,000  
1010 SNPs. The v4 platform covered about 570,000 SNPs, providing extra coverage of

1011 lower-frequency coding variation. The v5 platform, in current use, is based on an  
1012 Illumina Infinium Global Screening Array (~640,000 SNPs) supplemented with ~50,000  
1013 SNPs of custom content. In cases where samples did not reach the 98.5% call rate, the  
1014 sample was re-genotyped. When analyses failed repeatedly, then customers were re-  
1015 contacted by 23andMe customer service to provide additional samples.

1016 23andMe restricted participants to a set of unrelated individuals of European  
1017 ancestry, determined through an analysis of local ancestry<sup>135</sup>. Relatedness was defined  
1018 using a segmental identity-by-descent (IBD) estimation algorithm<sup>136</sup>. Imputation was  
1019 conducted by combining the May 2015 release of 1000 Genomes Phase 3  
1020 haplotypes<sup>137</sup> with the UK10K imputation reference panel<sup>138</sup> to create a single unified  
1021 imputation reference panel. Phasing was conducted using an internally-developed tool,  
1022 Finch, which uses the Beagle graph-based haplotype phasing algorithm<sup>139</sup> for platforms  
1023 V1 to V4 while for the V5 platform a similar approach was used with a new phasing  
1024 algorithm, Eagle2<sup>140</sup>. SNPs with a Hardy-Weinberg  $p < 10^{-20}$ , or a call rate of <90% were  
1025 flagged. SNPs were also flagged if they were only genotyped on their 'V1' and/or 'V2'  
1026 platforms due to small sample size and also if SNPs had genotype date effects. Finally,  
1027 SNPs were also flagged if they had probes matching multiple genomic positions in the  
1028 reference genome<sup>136-140</sup>.

1029

1030 *GWAS.*

1031 GWAS was conducted using logistic regression under an additive genetic model,  
1032 while adjusting for age, sex, the top five principal components of ancestry in order to  
1033 control for population stratification, and indicators for genotype platforms to account for



1034 batch effects. We excluded SNPs with Minor Allele Frequency (MAF) <0.01, low  
1035 imputation quality ( $R^2 < 0.3$ ) and indels, resulting in 8,288,850 SNPs in the GWAS  
1036 summary statistics. SNPs within the X chromosome were further excluded, resulting in  
1037 8,076,862 SNPs for subsequent analyses unless otherwise indicated.

1038

### 1039 **Statistical analyses**

1040 *FUMA-based analyses.* The FUMA<sup>60</sup> web application was used on the Genome-  
1041 Wide Association summary statistics to identify genomic loci along with the “sentinel”  
1042 SNPs that were independent in our analysis with a genome-wide significant P-value ( $< 5$   
1043  $\times 10^{-8}$ ) that are in approximate linkage disequilibrium (LD) with each other at  $r^2 < 0.1$  and  
1044 to generate Manhattan plots and Quantile-Quantile plots.

1045 Gene-based analysis and gene-set analysis was performed with MAGMA (v1.08)  
1046 using FUMA (v1.3.4) and the association analysis summary statistics. Gene expression  
1047 data analysis was obtained from GTEx v8 (<https://www.gtexportal.org/home/>) integrated  
1048 by FUMA. More specifically, the gene expression values were log2 transformed average  
1049 RPKM per tissue type after winsorization at 50 based on GTEx RNA-seq data. Tissue  
1050 expression analysis was performed for 53 tissue types where the result of gene analysis  
1051 was tested for one side while conditioning on average expression across all tissue  
1052 types.

1053

1054 *LD score regression and genetic correlations.* SNP-heritability was computed with LD  
1055 Score regression software<sup>64</sup>, and heritability estimates were adjusted to the liability  
1056 scale based on population prevalence of poor rhythm of 3.0%-6.5% (Supplementary

1057 Table 3, Supplementary Notes). We partitioned heritability of beat synchronization by 52  
1058 broad functional categories (Supplementary Table 7), using stratified LD score  
1059 regression<sup>64,67</sup> (Bonferroni-corrected significance level of  $p=9.6 \times 10^{-4}$ ).

1060 We further investigated cell-type-specific and tissue-specific enrichments with  
1061 LDSC-SEG (LDSC Specifically Expressed Genes)<sup>67</sup>, using a total of 697 gene sets (3  
1062 Cahoy gene sets, 205 Multi-tissue gene expression sets and 489 Multi-tissue chromatin  
1063 sets from the RoadMap Epigenomics and ENCODE datasets); the Bonferroni-corrected  
1064 significance level for this analysis was  $7.1 \times 10^{-5}$  (Supplementary Table 8).

1065 The set of human accelerated regions (HARs) was taken from<sup>69</sup>. All variants in  
1066 perfect LD ( $r^2 = 1.0$  in 1000 Genomes European individuals) with variants in HARs were  
1067 considered in the analysis. Similarly, variants tagging Neanderthal introgressed  
1068 haplotypes were defined as in<sup>141</sup>. All variants in perfect LD with a Neanderthal tag SNP  
1069 were considered Neanderthal variants. For each set, we performed stratified LDSC  
1070 (v1.0.0) with European LD scores and the baseline LD-score annotations v2.1. The  
1071 heritability enrichment is defined as the proportion of heritability explained by SNPs in  
1072 the annotation divided by the proportion of SNPs in the annotation. Standard effect size  
1073 ( $\tau_c^*$ ), which quantifies the effects unique to the annotation, is the proportionate change in  
1074 per-SNP heritability associated with a one standard deviation increase in the value of  
1075 the annotation, conditional on other annotations in the baseline v2.1 model<sup>66</sup>. To  
1076 determine the expected number of overlaps between the  $N$  loci significantly associated  
1077 with beat synchronization and HARs, we computed all overlaps between these sets of  
1078 genomic regions (in hg19 coordinates) using bedtools<sup>2142</sup>. We then randomly shuffled  
1079 the locations of HARs around the genome respecting their lengths and avoiding gaps in

1080 the genome assembly. We repeated this process 10,000 times and for each iteration  
1081 computed the number of overlaps observed with the significantly associated loci. Based  
1082 on this empirical distribution created with no association between the region sets, we  
1083 computed the enrichment and p-value for the observed number of overlaps.

1084 Genetic correlations between beat synchronization and other complex traits were  
1085 estimated using LDSC through LDHub v1.9.0 (<http://ldsc.broadinstitute.org/ldhub/>)<sup>47</sup>  
1086 using publicly available GWAS summary statistics therein. In total, 764 traits were  
1087 examined (Bonferroni corrected threshold =  $6.5 \times 10^{-5}$ ).

1088

### 1089 *Beat synchronization Polygenic Score (PGS) prediction of musicianship*

1090 Overview. We examined whether beat synchronization polygenic scores (PGS)  
1091 would be associated with musicianship in a health care context. Musicians cases were  
1092 drawn from a recent phenome-wide study of 9,803 musicians<sup>76</sup> identified from keyword  
1093 searches of patient electronic health records (EHRs) in Vanderbilt University Medical  
1094 Center's de-identified research database (Synthetic Derivative). The phenotyping  
1095 method was based on mining of clinical notes, utilizing 4 keywords and 449 regular  
1096 expressions (i.e., "musician", "plays the piano"); see Supplementary Notes and<sup>76</sup> for  
1097 details. Their method was validated with manually conducted chart review, with a  
1098 positive predictive value (PPV) of 93%. Here we accessed the subset of n=1,753  
1099 musicians that were also part of the BioVU database and had genotyped data on file, to  
1100 test the hypothesis that higher PGS for beat synchronization would be associated with  
1101 musicianship (i.e., higher likelihood of having musician-related keywords/regular  
1102 expressions recorded in an individual's electronic health record).

1103 We only selected individuals of European ancestry with genetic data that met  
1104 standard quality control thresholds, resulting in n=1,753 individuals (965 (55%) males,  
1105 mean median age of record (SD)=44.3(22.5)) as musician “cases” and 65,147 controls  
1106 (28698(44%) males, mean median age of record (SD)=48.3(22.3)). See Supplementary  
1107 Notes for details on the phenotyping, the samples, genotyping, and QC.

1108 Polygenic scores. We used an IBD filter of 0.2 in order to include unrelated  
1109 European samples of BioVU. PGS were generated using the beat synchronization  
1110 GWAS summary statistics, using software PRS\_CS<sup>143</sup>. Briefly, this method uses a  
1111 Bayesian regression framework and places continuous shrinkage (CS) prior on SNP  
1112 effect sizes; this method outperforms previous methods in terms of prediction accuracy  
1113 especially when the training sample size is large<sup>143</sup>, as is the case with the beat  
1114 synchronization GWAS. The 1000genomes reference set was used. The PGS was  
1115 standardized to have a mean of 0 and SD of 1.

1116 Control traits in BioVU. As negative control phenotypes we selected the following  
1117 traits: Iron deficiency anemias (phecode:280, cases=4,594, controls=62,306),  
1118 carcinoma in situ of skin (phecode:172.3, cases=523, controls=66,377), and cancer of  
1119 the brain (phecode:191.11, cases=970, controls=65,930).

1120 Data analysis. We conducted a logistic regression where the outcome variable  
1121 was keyword “musician” (yes vs no) and the predictor variable was PGS for beat  
1122 synchronization, while also adjusting for median age, sex, 10 Principal Components and  
1123 genotyping batch. The same process was followed when the outcome variables were  
1124 iron deficiency anemias, carcinoma in situ of skin and cancer of the brain (cases vs.  
1125 controls).

1126

1127  
1128 **Acknowledgments:** We are grateful to 23andMe participants for their contribution to  
1129 the study, Nancy Cox and Simon Fisher for suggestions and insight throughout the  
1130 process, Navya Thakkar for assistance with graphics, and Miriam Lense, Matthew D.  
1131 Morrison, and Wim Pouw for thoughtful discussions. We would also like to thank  
1132 Michaela Novakovic, Yune Lee, and Duane Watson for input during previous stages of  
1133 the project, and Vanderbilt Trans-Institutional Programs for sparking the initial  
1134 collaboration. Members of the 23andMe Research Team are: Michelle Agee, Stella  
1135 Aslibekyan, Adam Auton, Robert K. Bell, Katarzyna Bryc, Sarah K. Clark, Sarah L.  
1136 Elson, Kipper Fletez-Brant, Pierre Fontanillas, Nicholas A. Furlotte, Pooja M. Gandhi,  
1137 Karl Heilbron, Barry Hicks, Karen E. Huber, Ethan M. Jewett, Yunxuan Jiang, Aaron  
1138 Kleinman, Keng-Han Lin, Nadia K. Litterman, Jennifer C. McCreight, Matthew H.  
1139 McIntyre, Kimberly F. McManus, Joanna L. Mountain, Sahar V. Mozaffari, Priyanka  
1140 Nandakumar, Elizabeth S. Noblin, Carrie A.M. Northover, Jared O'Connell, Steven J.  
1141 Pitts, G. David Poznik, Anjali J. Shastri, Janie F. Shelton, Suyash Shringarpure, Chao  
1142 Tian, Joyce Y. Tung, Robert J. Tunney, Vladimir Vacic, and Xin Wang.

1143  
1144 **Funding:**  
1145 Research reported in this publication was supported by the National Institutes of  
1146 Health Common Fund through the Office of the NIH Director and the Eunice Kennedy  
1147 Shriver National Institute of Child Health & Human Development under award number  
1148 DP2HD098859, and by the National Institute On Deafness And Other Communication  
1149 Disorders under award numbers K18DC017383 and R01DC016977. JAC was  
1150 supported by the National Institutes of Health (R35GM127087). The content is solely

1151 the responsibility of the authors and does not necessarily represent the official views of  
1152 the NIH.

1153 The dataset used for the analyses described were obtained from Vanderbilt  
1154 University Medical Center's BioVU which is supported by numerous sources:  
1155 institutional funding, private agencies, and federal grants. These include the NIH funded  
1156 Shared Instrumentation Grant S10RR025141; and CTSA grants UL1TR002243,  
1157 UL1TR000445, and UL1RR024975. Genomic data are also supported by investigator-  
1158 led projects that include U01HG004798, R01NS032830, RC2GM092618,  
1159 P50GM115305, U01HG006378, U19HL065962, R01HD074711; and additional funding  
1160 sources listed at <https://victr.vumc.org/biovu-funding/>. Also, The Genotype-Tissue  
1161 Expression (GTEx) Project was supported by the Common Fund of the Office of the  
1162 Director of the National Institutes of Health, and by NCI, NHGRI, NHLBI, NIDA, NIMH,  
1163 and NINDS. GTEx data used for the analyses described in this manuscript were  
1164 obtained from: the GTEx Portal on 07/26/19 and dbGaP accession  
1165 number phs000424.vN.pN on 07/26/19 .

1166

1167

## 1168 **Author contributions**

1169 *Conceptualization of study:* Reyna Gordon, Lea Davis

1170 *Study design of GWAS and design of other genomic analyses:*

1171 Lea Davis, Reyna Gordon, J. Fah Sathirapongsasuti, Maria Niarchou, Tony Capra, David Hinds

1172 *Data collection of genomic data:* J. Fah Sathirapongsasuti, The 23andMe Research Team,

1173 David Hinds

1174 *Genome-wide Association analysis:* J. Fah Sathirapongsasuti, The 23andMe Research Team

1175

1176 *Post-association QC and generation of figures:* Peter Straub and Maria Niarchou

1177 *Post-GWAS analyses (heritability, gene-based analyses, gene set analyses, LD correlations,*

1178 *mtcojo, PGS in BioVU):*

1179 Maria Niarchou, Reyna Gordon, Peter Straub, Else Eising, Lea Davis

1180 *HARS and Neanderthal introgression analyses and interpretation:* Evonne McArthur, John A

1181 Capra

1182 *Genomic SEM:* Daniel Gustavson

1183 *Sensitivity Analyses of Chromosome 17 inversion and Parkinson’s Disease:* J. Fah

1184 Sathirapongsasuti

1185 *Estimation of population prevalence of rhythm deficits:* Miriam Mosing, Daniel Gustavson, and

1186 Reyna Gordon

1187 *Phenotype validation studies - design and materials:* Reyna Gordon, J. Devin McAuley, Nori

1188 Jacoby, Daniel Gustavson, Manuel Anglada-Tort

1189 *Phenotype validation data collection:* Nori Jacoby, Eamonn Bell, Manuel Anglada-Tort

1190 *Phenotype validation study data analysis:* Manuel Anglada-Tort, Daniel Gustavson, Eamonn

1191 Bell, Nori Jacoby, Peter Straub, Maria Niarchou, Reyna Gordon

1192 *Interpretation of data, writing, editing, and reviewing drafts:* All authors

1193 *Project Supervision:* Reyna Gordon, Lea Davis, Nori Jacoby, David Hinds

1194

1195 **Competing interests:** JFS, DH, and members of the 23andMe Research Team are

1196 employees of 23andMe, Inc., and hold stock or stock options in 23andMe. All other

1197 authors declare no competing interests.

1198

1199 **Data and materials availability:** The full GWAS summary statistics for the 23andMe  
1200 dataset will be made available through 23andMe to qualified researchers under an  
1201 agreement that protects the privacy of the 23andMe participants. Please visit  
1202 [research.23andme.com/collaborate/#publication](https://research.23andme.com/collaborate/#publication) for more information and to apply to  
1203 access the data. The data and code from the phenotype validation studies, and all of  
1204 the code from the post-GWAS analyses, are also available upon reasonable request.  
1205



## References

1. Savage, P. E., Brown, S., Sakai, E. & Currie, T. E. Statistical universals reveal the structures and functions of human music. *Proc Natl Acad Sci U S A* **112**, 8987–8992 (2015).
2. Ravignani, A., Delgado, T. & Kirby, S. Musical evolution in the lab exhibits rhythmic universals. *Nat. Hum. Behav.* (2017) doi:10.1038/s41562-016-0007.
3. Mehr, S. A. *et al.* Universality and diversity in human song. *Science (80-. )*. (2019) doi:10.1126/science.aax0868.
4. Kotz, S. A., Ravignani, A. & Fitch, W. T. The Evolution of Rhythm Processing. *Trends in Cognitive Sciences* (2018) doi:10.1016/j.tics.2018.08.002.
5. Pouw, W., Paxton, A., Harrison, S. J. & Dixon, J. A. Acoustic information about upper limb movement in voicing. *Proc. Natl. Acad. Sci. U. S. A.* (2020) doi:10.1073/pnas.2004163117.
6. Large, E. W. & Jones, M. R. The dynamics of attending: How we track time varying events. *Psychol. Rev.* **106**, 119–159 (1999).
7. Nobre, A. C. & Van Ede, F. Anticipated moments: Temporal structure in attention. *Nature Reviews Neuroscience* (2018) doi:10.1038/nrn.2017.141.
8. Hannon, E. E. & Trehub, S. E. Tuning in to musical rhythms: Infants learn more readily than adults. *Proc. Natl. Acad. Sci. U. S. A.* (2005) doi:10.1073/pnas.0504254102.
9. Winkler, I., Haden, G. P., Ladinig, O., Sziller, I. & Honing, H. Newborn infants detect the beat in music. *Proc. Natl. Acad. Sci. U. S. A.* **106**, 2468–2471 (2009).
10. Zentner, M. & Eerola, T. Rhythmic engagement with music in infancy. *Proc. Natl. Acad. Sci. U. S. A.* **107**, 5768–5773 (2010).
11. Cirelli, L. K., Trehub, S. E. & Trainor, L. J. Rhythm and melody as social signals for infants. *Ann. N. Y. Acad. Sci.* **1423**, 66–72 (2018).
12. Nazzi, T., Bertoncini, J. & Mehler, J. Language discrimination by newborns: toward an understanding of the role of rhythm. *J Exp Psychol Hum Percept Perform* **24**, 756–766 (1998).
13. McAuley, J. D., Jones, M. R., Holub, S., Johnston, H. M. & Miller, N. S. The time of our lives: Life span development of timing and event tracking. *J. Exp. Psychol. Gen.* (2006) doi:10.1037/0096-3445.135.3.348.
14. Polak, R. *et al.* Rhythmic Prototypes Across Cultures. *Music Percept. An Interdiscip. J.* (2018) doi:10.1525/mp.2018.36.1.1.
15. London, J., Polak, R. & Jacoby, N. Rhythm histograms and musical meter: A corpus study of Malian percussion music. *Psychon. Bull. Rev.* (2017) doi:10.3758/s13423-016-1093-7.
16. Clayton, M., Sager, R. & Will, U. In time with the music : the concept of entrainment and its significance for ethnomusicology. *Eur. Meet. Ethnomusicol.* (2005).
17. Polak, R. & London, J. Timing and Meter in Mande Drumming from Mali. *Music Theory Online* (2014) doi:10.30535/mto.20.1.1.
18. Polak, R., London, J. & Jacoby, N. Both isochronous and non-isochronous metrical subdivision afford precise and stable ensemble entrainment: A corpus

- study of malian jembe drumming. *Front. Neurosci.* (2016) doi:10.3389/fnins.2016.00285.
19. Patel, A. D. & Iversen, J. R. The evolutionary neuroscience of musical beat perception: the Action Simulation for Auditory Prediction (ASAP) hypothesis. *Front. Syst. Neurosci.* **8**, 57 (2014).
  20. Jacoby, N. & McDermott, J. H. Integer Ratio Priors on Musical Rhythm Revealed Cross-culturally by Iterated Reproduction. *Curr. Biol.* (2017) doi:10.1016/j.cub.2016.12.031.
  21. Cameron, D. J., Bentley, J. & Grahn, J. A. Cross-cultural influences on rhythm processing: Reproduction, discrimination, and beat tapping. *Front. Psychol.* (2015) doi:10.3389/fpsyg.2015.00366.
  22. Neuhoff, H., Polak, R. & Fischinger, T. Perception and evaluation of timing patterns in drum ensemble music from Mali. *Music Perception* (2017) doi:10.1525/MP.2017.34.4.438.
  23. Tarr, B., Slater, M. & Cohen, E. Synchrony and social connection in immersive Virtual Reality. *Sci. Rep.* (2018) doi:10.1038/s41598-018-21765-4.
  24. Lense, M. D. & Camarata, S. PRESS-Play: Musical Engagement as a Motivating Platform for Social Interaction and Social Play in Young Children with ASD. *Music Sci.* (2020) doi:10.1177/2059204320933080.
  25. Honing, H. On the biological basis of musicality. *Ann. N. Y. Acad. Sci.* (2018) doi:10.1111/nyas.13638.
  26. Fitch, W. T. Empirical approaches to the study of language evolution. *Psychon. Bull. Rev.* **24**, 3–33 (2017).
  27. Savage, P. E. *et al.* Music as a coevolved system for social bonding. *Behav. Brain Sci.* 1–42 (2020) doi:10.1017/S0140525X20000333.
  28. Merchant, H., Grahn, J., Trainor, L., Rohrmeier, M. & Fitch, W. T. Finding the beat: a neural perspective across humans and non-human primates. *Philos Trans R Soc L. B Biol Sci* **370**, 20140093 (2015).
  29. Gordon, C. L., Cobb, P. R. & Balasubramaniam, R. Recruitment of the motor system during music listening: An ALE meta-analysis of fMRI data. *PLoS One* (2018) doi:10.1371/journal.pone.0207213.
  30. Grahn, J. A. & McAuley, J. D. Neural bases of individual differences in beat perception. *Neuroimage* **47**, 1894–1903 (2009).
  31. Law, L. N. C. & Zentner, M. Assessing musical abilities objectively: Construction and validation of the Profile of Music Perception Skills. *PLoS One* **7**, e52508 (2012).
  32. Dalla Bella, S. *et al.* BAASTA: Battery for the Assessment of Auditory Sensorimotor and Timing Abilities. *Behav. Res. Methods* (2017) doi:10.3758/s13428-016-0773-6.
  33. Pulli, K. *et al.* Genome-wide linkage scan for loci of musical aptitude in Finnish families: evidence for a major locus at 4q22. *J Med Genet* **45**, 451–456 (2008).
  34. Oikkonen, J. *et al.* A genome-wide linkage and association study of musical aptitude identifies loci containing genes related to inner ear development and neurocognitive functions. *Mol. Psychiatry* **20**, 275 (2014).
  35. Ullén, F., Mosing, M. A., Holm, L., Eriksson, H. & Madison, G. Psychometric properties and heritability of a new online test for musicality, the Swedish Musical

- Discrimination Test. *Pers. Individ. Dif.* **63**, 87–93 (2014).
36. Mosing, M. A., Verweij, K. J. H., Madison, G. & Ullén, F. The genetic architecture of correlations between perceptual timing, motor timing, and intelligence. *Intelligence* **57**, 33–40 (2016).
  37. Seesjärvi, E. *et al.* The Nature and Nurture of Melody: A Twin Study of Musical Pitch and Rhythm Perception. *Behav. Genet.* (2016) doi:10.1007/s10519-015-9774-y.
  38. Gingras, B., Honing, H., Peretz, I., Trainor, L. J. & Fisher, S. E. Defining the biological bases of individual differences in musicality. *Philos. Trans. R. Soc. B Biol. Sci.* **370**, 20140092 (2015).
  39. Wray, N. R., Goddard, M. E. & Visscher, P. M. Prediction of individual genetic risk of complex disease. *Curr. Opin. Genet. Dev.* **18**, 257–263 (2008).
  40. Woodruff Carr, K., White-Schwoch, T., Tierney, A. T., Strait, D. L. & Kraus, N. Beat synchronization predicts neural speech encoding and reading readiness in preschoolers. *Proc. Natl. Acad. Sci. U. S. A.* **111**, 14559–14564 (2014).
  41. Swaminathan, S. & Schellenberg, E. G. Musical Ability, Music Training, and Language Ability in Childhood. *J. Exp. Psychol. Learn. Mem. Cogn.* (2019) doi:10.1037/xlm0000798.
  42. Keller, P. E., Novembre, G. & Hove, M. J. Rhythm in joint action: Psychological and neurophysiological mechanisms for real-time interpersonal coordination. *Philosophical Transactions of the Royal Society B: Biological Sciences* (2014) doi:10.1098/rstb.2013.0394.
  43. Ladányi, E., Persici, V., Fiveash, A., Tillmann, B. & Gordon, R. L. Is atypical rhythm a risk factor for developmental speech and language disorders? *WIREs Cogn. Sci.* **11**, (2020).
  44. Moundjian, L., Sarkamo, T., Leone, C., Leman, M. & Feys, P. Effectiveness of music-based interventions on motricity or cognitive functioning in neurological populations: A systematic review. *European Journal of Physical and Rehabilitation Medicine* (2017) doi:10.23736/S1973-9087.16.04429-4.
  45. Cheever, T. *et al.* NIH/Kennedy Center Workshop on Music and the Brain: Finding Harmony. in *Neuron* (2018). doi:10.1016/j.neuron.2018.02.004.
  46. van Rheenen, W., Peyrot, W. J., Schork, A. J., Lee, S. H. & Wray, N. R. Genetic correlations of polygenic disease traits: from theory to practice. Supplementary Note with R Code. *Nat. Rev. Genet.* (2019) doi:10.1038/s41576-019-0137-z.
  47. Zheng, J. *et al.* LD Hub: a centralized database and web interface to perform LD score regression that maximizes the potential of summary level GWAS data for SNP heritability and genetic correlation analysis. *Bioinformatics* **33**, 272–279 (2017).
  48. Müllensiefen, D., Gingras, B., Musil, J. & Stewart, L. The musicality of non-musicians: an index for assessing musical sophistication in the general population. *PLoS One* **9**, e89642 (2014).
  49. Musil, J. J., Iversen, J. R. & Müllensiefen, D. Measuring individual differences in musical beat alignment perception. *Pers. Individ. Dif.* **60**, S35 (2014).
  50. Grahn, J. A. & Brett, M. Rhythm and beat perception in motor areas of the brain. *J. Cogn. Neurosci.* **19**, 893–906 (2007).
  51. Anglada-Tort, M., Harrison, P. & Jacoby, N. REPP: A robust cross-platform

- solution for online sensorimotor synchronization experiments. *bioRxiv* (2021) doi:10.1101/2021.01.15.426897.
52. Nagel, M. *et al.* Meta-analysis of genome-wide association studies for neuroticism in 449,484 individuals identifies novel genetic loci and pathways. *Nat Genet* **50**, 920–927 (2018).
  53. Pardinás, A. F. *et al.* Common schizophrenia alleles are enriched in mutation-intolerant genes and in regions under strong background selection. *Nat Genet* **50**, 381–389 (2018).
  54. Chang, D. *et al.* A meta-analysis of genome-wide association studies identifies 17 new Parkinson's disease risk loci. *Nat. Genet.* (2017) doi:10.1038/ng.3955.
  55. D'Angelo, D. *et al.* Defining the effect of the 16p11.2 duplication on cognition, behavior, and medical comorbidities. *JAMA Psychiatry* (2016) doi:10.1001/jamapsychiatry.2015.2123.
  56. Hippolyte, L. *et al.* The Number of Genomic Copies at the 16p11.2 Locus Modulates Language, Verbal Memory, and Inhibition. *Biol. Psychiatry* (2016) doi:10.1016/j.biopsych.2015.10.021.
  57. Bulik-Sullivan, B. K. *et al.* LD Score regression distinguishes confounding from polygenicity in genome-wide association studies. *Nat Genet* **47**, 291–295 (2015).
  58. Oikkonen, J., Onkamo, P., Järvelä, I. & Kanduri, C. Convergent evidence for the molecular basis of musical traits. *Sci. Rep.* **6**, 39707 (2016).
  59. Park, H. *et al.* Comprehensive genomic analyses associate UGT8 variants with musical ability in a Mongolian population. *J Med Genet* **49**, 747–752 (2012).
  60. Watanabe, K., Taskesen, E., van Bochoven, A. & Posthuma, D. Functional mapping and annotation of genetic associations with FUMA. *Nat. Commun.* **8**, 1826 (2017).
  61. Consortium, Gte. The Genotype-Tissue Expression (GTEx) pilot analysis: multitissue gene regulation in humans. *Science* (80-. ). **348**, 648–660 (2015).
  62. Ashburner, M. *et al.* Gene ontology: tool for the unification of biology. *Nat. Genet.* **25**, 25 (2000).
  63. The Gene Ontology, C. The Gene Ontology Resource: 20 years and still GOing strong. *Nucleic Acids Res* **47**, D330–D338 (2019).
  64. Finucane, H. K. *et al.* Partitioning heritability by functional annotation using genome-wide association summary statistics. *Nat. Genet.* **47**, 1228 (2015).
  65. Lindblad-Toh, K. *et al.* A high-resolution map of human evolutionary constraint using 29 mammals. *Nature* (2011) doi:10.1038/nature10530.
  66. Hujoel, M. L. A., Gazal, S., Hormozdiari, F., van de Geijn, B. & Price, A. L. Disease Heritability Enrichment of Regulatory Elements Is Concentrated in Elements with Ancient Sequence Age and Conserved Function across Species. *Am J Hum Genet* **104**, 611–624 (2019).
  67. Finucane, H. K. *et al.* Heritability enrichment of specifically expressed genes identifies disease-relevant tissues and cell types. *Nat. Genet.* (2018) doi:10.1038/s41588-018-0081-4.
  68. Mithen, S. J. *The Singing Neanderthals: The origins of music, language, mind, and body.* (Harvard University Press, 2005).
  69. Capra, J. A., Erwin, G. D., McKinsey, G., Rubenstein, J. L. & Pollard, K. S. Many human accelerated regions are developmental enhancers. *Philos Trans R Soc L.*

- B Biol Sci* **368**, 20130025 (2013).
70. Hubisz, M. J. & Pollard, K. S. Exploring the genesis and functions of Human Accelerated Regions sheds light on their role in human evolution. *Curr Opin Genet Dev* **29**, 15–21 (2014).
  71. Doan, R. N. *et al.* Mutations in Human Accelerated Regions Disrupt Cognition and Social Behavior. *Cell* **167**, 341-354 e12 (2016).
  72. Todd, E. J. *et al.* Next generation sequencing in a large cohort of patients presenting with neuromuscular disease before or at birth. *Orphanet J. Rare Dis.* (2015) doi:10.1186/s13023-015-0364-0.
  73. Kichaev, G. *et al.* Leveraging Polygenic Functional Enrichment to Improve GWAS Power. *Am J Hum Genet* **104**, 65–75 (2019).
  74. Davies, G. *et al.* Study of 300,486 individuals identifies 148 independent genetic loci influencing general cognitive function. *Nat. Commun.* **9**, 2098 (2018).
  75. Sankararaman, S. *et al.* The genomic landscape of Neanderthal ancestry in present-day humans. *Nature* **507**, 354–357 (2014).
  76. Niarchou, M., Lin, G., Lense, M. D., Gordon, R. L. & Davis, L. K. The medical signature of musicians: A Phenome-wide association study using an Electronic Health Record database. *medRxiv* 2020.08.14.20175109 (2020) doi:10.1101/2020.08.14.20175109.
  77. Couth, S., Mazlan, N., Moore, D. R., Munro, K. J. & Dawes, P. Hearing Difficulties and Tinnitus in Construction, Agricultural, Music, and Finance Industries: Contributions of Demographic, Health, and Lifestyle Factors. *Trends Hear.* (2019) doi:10.1177/2331216519885571.
  78. Watanabe, K. *et al.* A global overview of pleiotropy and genetic architecture in complex traits. *Nat. Genet.* **51**, 1339–1348 (2019).
  79. Grotzinger, A. D. *et al.* Genomic SEM Provides Insights into the Multivariate Genetic Architecture of Complex Traits HHS Public Access. *Nat Hum Behav* (2019) doi:10.1038/s41562-019-0566-x.
  80. Shrine, N. *et al.* New genetic signals for lung function highlight pathways and chronic obstructive pulmonary disease associations across multiple ancestries. *Nat. Genet.* (2019) doi:10.1038/s41588-018-0321-7.
  81. Willems, S. M. *et al.* Large-scale GWAS identifies multiple loci for hand grip strength providing biological insights into muscular fitness. *Nat. Commun.* (2017) doi:10.1038/ncomms16015.
  82. Finkel, D., Ernsth-Bravell, M. & Pedersen, N. L. Temporal Dynamics of Motor Functioning and Cognitive Aging. *Journals Gerontol. - Ser. A Biol. Sci. Med. Sci.* (2015) doi:10.1093/gerona/glv110.
  83. Bégel, V., Verga, L., Benoit, C. E., Kotz, S. A. & Dalla Bella, S. Test-retest reliability of the Battery for the Assessment of Auditory Sensorimotor and Timing Abilities (BAASTA). *Ann. Phys. Rehabil. Med.* (2018) doi:10.1016/j.rehab.2018.04.001.
  84. Bonacina, S., Krizman, J., White-Schwoch, T., Nicol, T. & Kraus, N. How Rhythmic Skills Relate and Develop in School-Age Children. *Glob. Pediatr. Heal.* (2019) doi:10.1177/2333794x19852045.
  85. Tranchant, P., Vuvan, D. T. & Peretz, I. Keeping the beat: A large sample study of bouncing and clapping to music. *PLoS One* (2016)

- doi:10.1371/journal.pone.0160178.
86. Tranchant, P. & Peretz, I. Basic timekeeping deficit in the Beat-based Form of Congenital Amusia. *Sci. Rep.* (2020) doi:10.1038/s41598-020-65034-9.
  87. Lévy, J. *et al.* Molecular and clinical delineation of 2p15p16. 1 microdeletion syndrome. *Am. J. Med. Genet. Part A* **173**, 2081–2087 (2017).
  88. Jones, S. E. *et al.* Genome-wide association analyses of chronotype in 697,828 individuals provides insights into circadian rhythms. *Nat. Commun.* (2019) doi:10.1038/s41467-018-08259-7.
  89. Grahn, J. A. & Rowe, J. B. Feeling the Beat: Premotor and Striatal Interactions in Musicians and Nonmusicians during Beat Perception. *J. Neurosci.* **29**, 7540–7548 (2009).
  90. Grahn, J. A. & Rowe, J. B. Finding and feeling the musical beat: striatal dissociations between detection and prediction of regularity. *Cereb. Cortex* **23**, 913–921 (2013).
  91. Kung, S.-J., Chen, J. L., Zatorre, R. J. & Penhune, V. B. Interacting cortical and basal ganglia networks underlying finding and tapping to the musical beat. *J. Cogn. Neurosci.* **25**, 401–420 (2013).
  92. Bengtsson, S. L. *et al.* Listening to rhythms activates motor and premotor cortices. *Cortex*. **45**, 62–71 (2009).
  93. Teki, S., Grube, M., Kumar, S. & Griffiths, T. D. Distinct Neural Substrates of Duration-Based and Beat-Based Auditory Timing. *J. Neurosci.* **31**, 3805–3812 (2011).
  94. McAuley, J. D., Henry, M. J. & Tkach, J. Tempo mediates the involvement of motor areas in beat perception. *Ann. N. Y. Acad. Sci.* **1252**, 77–84 (2012).
  95. Dissanayake, E. If music is the food of love, what about survival and reproductive success? *Music. Sci.* **12**, 169–195 (2008).
  96. Mas-Herrero, E., Marco-Pallares, J., Lorenzo-Seva, U., Zatorre, R. J. & Rodriguez-Fornells, A. Individual differences in music reward experiences. *Music Percept. An Interdiscip. J.* **31**, 118–138 (2013).
  97. Mosing, M. A., Pedersen, N. L., Madison, G. & Ullén, F. Genetic pleiotropy explains associations between musical auditory discrimination and intelligence. *PLoS One* **9**, e113874 (2014).
  98. Haegens, S. & Golumbic, E. Z. Rhythmic facilitation of sensory processing: a critical review. *Neurosci. Biobehav. Rev.* **86**, 150–165 (2018).
  99. Sowiński, J. & Dalla Bella, S. Poor synchronization to the beat may result from deficient auditory-motor mapping. *Neuropsychologia* **51**, 1952–1963 (2013).
  100. Jacoby, N. *et al.* Cross-Cultural Work in Music Cognition. *Music Percept. An Interdiscip. J.* (2020) doi:10.1525/mp.2020.37.3.185.
  101. Devaney, J. Eugenics and Musical Talent: Exploring Carl Seashore’s Work on Talent Testing and Performance. *Am. Music Rev.* **48**, (2019).
  102. Adam, D. The promise and peril of the new science of social genomics. *Nature* (2019) doi:10.1038/d41586-019-03171-6.
  103. Wray, N. R. *et al.* Research Review: Polygenic methods and their application to psychiatric traits. *Journal of Child Psychology and Psychiatry and Allied Disciplines* (2014) doi:10.1111/jcpp.12295.
  104. Border, R. *et al.* No support for historical candidate gene or candidate gene-by-

- interaction hypotheses for major depression across multiple large samples. *Am. J. Psychiatry* **176**, 376–387 (2019).
105. Mosing, M. A., Madison, G., Pedersen, N. L. & Ullén, F. Investigating cognitive transfer within the framework of music practice: Genetic pleiotropy rather than causality. *Dev. Sci.* **19**, 504–512 (2016).
  106. Zuk, J., Benjamin, C., Kenyon, A. & Gaab, N. Behavioral and neural correlates of executive functioning in musicians and non-musicians. *PLoS One* **9**, e99868 (2014).
  107. Ullén, F., Mosing, M. A. & Madison, G. Associations between motor timing, music practice, and intelligence studied in a large sample of twins. *Ann. N. Y. Acad. Sci.* **1337**, 125–129 (2015).
  108. Medina, D. & Barraza, P. Efficiency of attentional networks in musicians and non-musicians. *Heliyon* **5**, e01315 (2019).
  109. Emery, C. F., Finkel, D. & Pedersen, N. L. Pulmonary Function as a Cause of Cognitive Aging. *Psychol. Sci.* (2012) doi:10.1177/0956797612439422.
  110. Finkel, D., Ernst Bravell, M. & Pedersen, N. L. Role of motor function and lung function in pathways to ageing and decline. *Aging Clin. Exp. Res.* (2020) doi:10.1007/s40520-020-01494-3.
  111. Duggan, E. C. *et al.* A Multi-study Coordinated Meta-analysis of Pulmonary Function and Cognition in Aging. *Journals Gerontol. - Ser. A Biol. Sci. Med. Sci.* (2019) doi:10.1093/gerona/glz057.
  112. Clouston, S. A. P. *et al.* The dynamic relationship between physical function and cognition in longitudinal aging cohorts. *Epidemiol. Rev.* (2013) doi:10.1093/epirev/mxs004.
  113. Larsson, M., Richter, J. & Ravignani, A. Bipedal Steps in the Development of Rhythmic Behavior in Humans. *Music Sci.* (2019) doi:10.1177/2059204319892617.
  114. Provasi, J., Anderson, D. I. & Barbu-Roth, M. Rhythm perception, production, and synchronization during the perinatal period. *Frontiers in Psychology* (2014) doi:10.3389/fpsyg.2014.01048.
  115. Cirelli, L. K. How interpersonal synchrony facilitates early prosocial behavior. *Current Opinion in Psychology* (2018) doi:10.1016/j.copsyc.2017.08.009.
  116. Bernard, J. A., Millman, Z. B. & Mittal, V. A. Beat and metaphoric gestures are differentially associated with regional cerebellar and cortical volumes. *Hum. Brain Mapp.* (2015) doi:10.1002/hbm.22894.
  117. Gjermunds, N., Brechan, I., Johnsen, S. Å. K. & Watten, R. G. Musicians: Larks, Owls or Hummingbirds? *J. Circadian Rhythms* **17**, 4 (2019).
  118. Martin, J., Taylor, M. J. & Lichtenstein, P. Assessing the evidence for shared genetic risks across psychiatric disorders and traits. *Psychological Medicine* (2018) doi:10.1017/S0033291717003440.
  119. Tung, J. Y. *et al.* Efficient replication of over 180 genetic associations with self-reported medical data. *PLoS One* **6**, e23473 (2011).
  120. Mansens, D., Deeg, D. J. H. & Comijs, H. C. The association between singing and/or playing a musical instrument and cognitive functions in older adults. *Aging Ment. Heal.* (2018) doi:10.1080/13607863.2017.1328481.
  121. Povel, D.-J. & Essens, P. Perception of temporal patterns. *Music Percept. An*

- Interdiscip. J.* **2**, 411–440 (1985).
122. Gordon, R. L., Jacobs, M. S., Schuele, C. M. & Mcauley, J. D. *Perspectives on the rhythm-grammar link and its implications for typical and atypical language development. Annals of the New York Academy of Sciences* vol. 1337 (2015).
  123. Wieland, E. A., McAuley, J. D., Dilley, L. C. & Chang, S.-E. Evidence for a rhythm perception deficit in children who stutter. *Brain Lang.* **144**, 26–34 (2015).
  124. Woods, K. J. P., Siegel, M. H., Traer, J. & McDermott, J. H. Headphone screening to facilitate web-based auditory experiments. *Attention, Perception, Psychophys.* **79**, 2064–2072 (2017).
  125. Macmillan, N. A. & Creelman, C. D. *Detection theory: a user's guide.* (Cambridge University Press, 1991).
  126. Gordon, R. L. *et al.* Musical rhythm discrimination explains individual differences in grammar skills in children. *Dev. Sci.* (2015) doi:10.1111/desc.12230.
  127. Berinsky, A. J., Margolis, M. F. & Sances, M. W. Separating the shirkers from the workers? Making sure respondents pay attention on self-administered surveys. *Am. J. Pol. Sci.* (2014) doi:10.1111/ajps.12081.
  128. Anwyl-Irvine, A. L., Dalmaijer, E. S., Hodges, N., & Evershed, J. Online Timing Accuracy and Precision: A comparison of platforms, browsers, and participant's devices. *PsyArXiv.*
  129. Bridges, D., Pitiot, A., MacAskill, M. R. & Peirce, J. W. The timing mega-study: Comparing a range of experiment generators, both lab-based and online. *PeerJ* (2020) doi:10.7717/peerj.9414.
  130. McKinney, M. F., Moelants, D., Davies, M. E. P. & Klapuri, A. Evaluation of audio beat tracking and music tempo extraction algorithms. *J. New Music Res.* (2007) doi:10.1080/09298210701653252.
  131. Repp, B. H. Rate limits of on-beat and off-beat tapping with simple auditory rhythms: 1. Qualitative observations. *Music Percept.* (2005) doi:10.1525/mp.2005.22.3.479.
  132. Repp, B. H. & Su, Y. H. Sensorimotor synchronization: A review of recent research (2006-2012). *Psychon. Bull. Rev.* (2013) doi:10.3758/s13423-012-0371-2.
  133. London, J. *Hearing in Time: Psychological Aspects of Musical Meter. Hearing in Time: Psychological Aspects of Musical Meter* (2012). doi:10.1093/acprof:oso/9780199744374.001.0001.
  134. 3.5.1., R. D. C. T. A Language and Environment for Statistical Computing. *R Found. Stat. Comput.* (2018).
  135. Durand, E. Y., Do, C. B., Mountain, J. L. & Macpherson, J. M. Ancestry Composition: A Novel, Efficient Pipeline for Ancestry Deconvolution. *bioRxiv* 10512 (2014) doi:10.1101/010512.
  136. Henn, B. M. *et al.* Cryptic distant relatives are common in both isolated and cosmopolitan genetic samples. *PLoS One* **7**, e34267 (2012).
  137. The Genomes Project, C. *et al.* A global reference for human genetic variation. *Nature* **526**, 68 (2015).
  138. consortium, U. The UK10K project identifies rare variants in health and disease. *Nature* **526**, 82 (2015).
  139. Browning, S. R. & Browning, B. L. Rapid and accurate haplotype phasing and



- missing-data inference for whole-genome association studies by use of localized haplotype clustering. *Am. J. Hum. Genet.* **81**, 1084–1097 (2007).
140. Loh, P.-R., Palamara, P. F. & Price, A. L. Fast and accurate long-range phasing in a UK Biobank cohort. *Nat. Genet.* **48**, 811 (2016).
  141. Vernot, B. *et al.* Excavating Neandertal and Denisovan DNA from the genomes of Melanesian individuals. *Science* (80-. ). **352**, 235–239 (2016).
  142. Quinlan, A. R. & Hall, I. M. BEDTools: A flexible suite of utilities for comparing genomic features. *Bioinformatics* (2010) doi:10.1093/bioinformatics/btq033.
  143. Ge, T., Chen, C.-Y., Ni, Y., Feng, Y.-C. A. & Smoller, J. W. Polygenic prediction via Bayesian regression and continuous shrinkage priors. *Nat. Commun.* **10**, 1776 (2019).



2 **Tables**

3

4 Table 1. Sample demographics for each of the three cohorts (GWAS, Phenotype  
5 Experiment 1, and Phenotype Experiment 2).

6

**GWAS Sample by Phenotype group (response to Clap-to-beat question)**

|                       | Cases (Yes) | Controls (No) |
|-----------------------|-------------|---------------|
| Total                 | 555660      | 51165         |
| Males                 | 226188      | 23998         |
| Females               | 329472      | 27167         |
| 18 to 30 years old    | 57898       | 5186          |
| 30 to 45 years old    | 135168      | 12909         |
| 45 to 60 years old    | 150939      | 13312         |
| 60 years old and over | 211655      | 19758         |

**Phenotype Validation Experiment 1 – rhythm perception**

| <i>Full sample who provided demographics</i> | N   | Mean Age in years (for N=722 who reported demographics) | SD Age |
|----------------------------------------------|-----|---------------------------------------------------------|--------|
| Total                                        | 722 | 36.03                                                   | 10.98  |
| Males                                        | 386 | 34.86                                                   | 10.74  |
| Females                                      | 332 | 37.49                                                   | 11.07  |

**Phenotype Validation Experiment 2 – beat production and cross-trait**

| <i>Full sample</i>                    | N    | Mean Age in years | SD Age |
|---------------------------------------|------|-------------------|--------|
| Total                                 | 1412 | 36.34             | 11.93  |
| Males                                 | 678  | 35.53             | 11.12  |
| Females                               | 728  | 37.15             | 12.61  |
| <i>Subset with valid tapping data</i> | n    | Mean Age in years | SD Age |
| Total                                 | 542  | 35.24             | 11.39  |
| Males                                 | 241  | 35.02             | 10.62  |
| Females                               | 300  | 35.43             | 12.00  |

7

8

9

10

11

12

13

14

15

16

17

18

19 **Table 2. Genomic loci and sentinel SNPs significantly associated with beat synchronization in the**  
 20 **primary GWAS.** Further details (e.g., chromosomal location) are provided in Supplementary Table 2.  
 21

| Genomic Locus | Sentinel SNP | chr | A1 | MAF     | OR   | SE    | p-value  | gene symbol |
|---------------|--------------|-----|----|---------|------|-------|----------|-------------|
| 11            | rs848293     | 2   | G  | 0.42228 | 0.94 | 0.007 | 9.23E-18 | VRK2        |
| 26            | rs62340585   | 4   | G  | 0.20695 | 0.94 | 0.008 | 1.81E-14 | GPM6A       |
| 13            | rs10168817   | 2   | G  | 0.49299 | 0.95 | 0.007 | 1.94E-14 | NA          |
| 20            | rs10779987   | 3   | T  | 0.38175 | 0.95 | 0.007 | 2.21E-14 | GBE1        |
| 28            | rs28392605   | 5   | G  | 0.33904 | 0.95 | 0.007 | 8.93E-14 | NA          |
| 45            | rs1832909    | 9   | T  | 0.40687 | 1.05 | 0.007 | 1.78E-13 | NA          |
| 2             | rs34762587   | 1   | T  | 0.31379 | 1.05 | 0.007 | 2.25E-13 | FOXO6       |
| 60            | rs7542       | 16  | G  | 0.46184 | 0.95 | 0.007 | 2.41E-13 | MAPK3       |
| 5             | rs10875125   | 1   | C  | 0.15305 | 0.93 | 0.009 | 2.61E-13 | DPYD        |
| 35            | rs9400241    | 6   | C  | 0.28851 | 0.95 | 0.007 | 4.49E-13 | FOXO3       |
| 64            | rs4792891    | 17  | T  | 0.34013 | 1.05 | 0.007 | 7.07E-13 | MAPT        |
| 39            | rs1468701    | 7   | G  | 0.29172 | 0.95 | 0.007 | 3.62E-12 | SND1        |
| 50            | rs10848650   | 12  | G  | 0.42192 | 1.05 | 0.007 | 6.04E-12 | SLC6A13     |
| 29            | rs2635634    | 5   | T  | 0.45317 | 1.05 | 0.007 | 9.54E-12 | CDH12       |
| 67            | rs9626920    | 22  | G  | 0.41282 | 1.05 | 0.007 | 1.04E-11 | MIRLET7BHG  |
| 16            | rs764299     | 2   | G  | 0.26719 | 1.05 | 0.007 | 1.47E-11 | PLEKHM3     |
| 43            | rs10984506   | 9   | T  | 0.36558 | 1.05 | 0.007 | 1.66E-11 | ANP32B      |
| 53            | rs1426371    | 12  | G  | 0.25919 | 1.05 | 0.008 | 1.67E-11 | WSCD2       |
| 58            | rs12913592   | 15  | T  | 0.3596  | 1.05 | 0.007 | 6.13E-11 | NA          |
| 6             | rs72700870   | 1   | G  | 0.14377 | 0.94 | 0.009 | 1.42E-10 | MCL1        |
| 34            | rs9388171    | 6   | G  | 0.47595 | 0.96 | 0.007 | 2.16E-10 | NA          |
| 55            | rs6572878    | 14  | T  | 0.39477 | 0.96 | 0.007 | 3.48E-10 | HAUS4       |
| 4             | rs11210206   | 1   | T  | 0.31286 | 0.96 | 0.007 | 3.93E-10 | NA          |
| 28            | rs72633496   | 5   | T  | 0.43224 | 0.95 | 0.008 | 6.21E-10 | NA          |
| 10            | rs7586405    | 2   | G  | 0.30559 | 1.04 | 0.007 | 7.19E-10 | PPP1CB      |
| 63            | rs3024293    | 17  | T  | 0.23528 | 1.05 | 0.008 | 8.26E-10 | C1QL1       |
| 1             | rs2061843    | 1   | G  | 0.4001  | 0.96 | 0.007 | 1.19E-09 | CSMD2       |
| 19            | rs1349028    | 3   | T  | 0.25977 | 0.95 | 0.008 | 1.54E-09 | EIF4E3      |
| 25            | rs4443239    | 4   | T  | 0.2463  | 1.05 | 0.008 | 1.68E-09 | C4orf27     |
| 33            | rs1901739    | 5   | T  | 0.47772 | 1.04 | 0.007 | 2.14E-09 | NA          |
| 7             | rs55678522   | 1   | G  | 0.21629 | 0.95 | 0.008 | 2.25E-09 | LRRN2       |
| 61            | rs8079923    | 17  | T  | 0.25309 | 1.05 | 0.008 | 2.88E-09 | AKAP10      |
| 62            | rs7501911    | 17  | T  | 0.18191 | 0.95 | 0.009 | 3.34E-09 | NLK         |
| 66            | rs6087848    | 20  | G  | 0.44304 | 0.96 | 0.007 | 3.40E-09 | POFUT1      |
| 54            | rs10744255   | 12  | G  | 0.23229 | 0.96 | 0.008 | 4.24E-09 | NA          |
| 31            | rs13163173   | 5   | C  | 0.16597 | 0.95 | 0.009 | 4.51E-09 | MEF2C       |
| 3             | rs2819333    | 1   | T  | 0.37068 | 1.04 | 0.007 | 4.54E-09 | PTPRF       |
| 51            | rs2453873    | 12  | G  | 0.22254 | 0.95 | 0.008 | 5.17E-09 | NA          |
| 27            | rs67264739   | 5   | G  | 0.27395 | 0.96 | 0.007 | 5.54E-09 | ADCY2       |
| 56            | rs2284901    | 14  | G  | 0.37485 | 1.04 | 0.007 | 6.48E-09 | AKAP6       |
| 32            | rs1596431    | 5   | T  | 0.19182 | 1.05 | 0.008 | 7.42E-09 | NA          |
| 44            | rs10978661   | 9   | T  | 0.12006 | 0.94 | 0.01  | 7.74E-09 | ZNF462      |
| 23            | rs4263335    | 4   | G  | 0.49483 | 1.04 | 0.007 | 8.74E-09 | JAKMIP1     |
| 48            | rs7939759    | 11  | T  | 0.23981 | 1.05 | 0.008 | 1.23E-08 | CTSF        |
| 65            | rs9710427    | 19  | G  | 0.41536 | 1.04 | 0.007 | 1.32E-08 | TECR        |
| 21            | rs12638746   | 3   | G  | 0.33546 | 0.96 | 0.007 | 1.37E-08 | EPHA3       |
| 59            | rs12909047   | 15  | G  | 0.48251 | 1.04 | 0.007 | 1.49E-08 | UBL7        |
| 46            | rs2505344    | 10  | G  | 0.17674 | 0.95 | 0.009 | 1.51E-08 | EPC1        |
| 24            | rs67816799   | 4   | C  | 0.38188 | 1.04 | 0.007 | 1.56E-08 | CCSER1      |

|    |             |    |   |         |      |       |          |               |
|----|-------------|----|---|---------|------|-------|----------|---------------|
| 15 | rs10932201  | 2  | G | 0.46351 | 1.04 | 0.007 | 1.59E-08 | <i>CREB1</i>  |
| 49 | rs526904    | 11 | T | 0.34865 | 0.96 | 0.007 | 1.60E-08 | <i>PICALM</i> |
| 9  | rs6548147   | 2  | T | 0.4402  | 1.04 | 0.007 | 2.05E-08 | <i>TSSC1</i>  |
| 52 | rs10877461  | 12 | G | 0.29968 | 0.96 | 0.008 | 2.44E-08 | NA            |
| 41 | rs11996434  | 8  | G | 0.27037 | 1.04 | 0.008 | 2.61E-08 | NA            |
| 40 | rs1996148   | 8  | G | 0.31961 | 0.96 | 0.007 | 2.69E-08 | <i>PEBP4</i>  |
| 47 | rs10885458  | 10 | G | 0.28314 | 0.96 | 0.007 | 2.69E-08 | NA            |
| 17 | rs191373913 | 2  | T | 0.43899 | 0.96 | 0.007 | 2.74E-08 | <i>NGEF</i>   |
| 38 | rs12056186  | 7  | C | 0.42875 | 0.96 | 0.007 | 2.93E-08 | <i>ORC5</i>   |
| 42 | rs7856850   | 9  | C | 0.22184 | 0.96 | 0.008 | 3.07E-08 | <i>PTPRD</i>  |
| 36 | rs13197257  | 6  | T | 0.27444 | 0.96 | 0.007 | 3.23E-08 | <i>PTPRK</i>  |
| 14 | rs10497355  | 2  | T | 0.46078 | 1.04 | 0.007 | 3.43E-08 | <i>UBR3</i>   |
| 12 | rs11692449  | 2  | T | 0.37522 | 1.04 | 0.007 | 3.45E-08 | <i>XPO1</i>   |
| 30 | rs4704043   | 5  | T | 0.2827  | 1.04 | 0.007 | 3.65E-08 | <i>TNPO1</i>  |
| 18 | rs43182     | 3  | T | 0.13443 | 1.06 | 0.01  | 3.80E-08 | <i>PTPRG</i>  |
| 57 | rs62014217  | 15 | G | 0.20132 | 0.96 | 0.008 | 3.91E-08 | <i>HERC1</i>  |
| 8  | rs476141    | 1  | T | 0.49868 | 1.04 | 0.007 | 4.49E-08 | NA            |
| 37 | rs2849543   | 6  | G | 0.41591 | 1.04 | 0.007 | 4.60E-08 | <i>PARK2</i>  |
| 22 | rs571760466 | 3  | C | 0.27511 | 0.96 | 0.007 | 4.81E-08 | <i>LSAMP</i>  |

Abbreviations: SNP=Single Nucleotide Polymorphism, chr=Chromosome, A1=effect allele, MAF=Minor Allele Frequency, OR=Odds Ratio, S.E.=Standard Error, Notes: Gene symbol is based on HUGO (HGNC). These are all genes annotated to SNPs in  $r^2 > 0.1$  with the lead SNP; sentinel SNP in a given locus refers to independent SNP from FUMA. The SNPs were mapped to genes based on ANNOVAR annotation and on being physically located inside a protein coding gene using 10kb window. NA=when the SNP is not within the 10kb window of a gene.
