# Supplementary material for: Genome-wide association study of musical beat synchronization demonstrates high polygenicity
Source: bioRxiv or medRxiv preprint supplement (doi:10.1101/836197), 2021-09-06

## Regional association plots

Regional association plots are presented below for each of the 68 genomic loci associated with rhythm that surpassed the threshold for genome-wide significance. Plots were generated for each locus using FUMA, from the rhythm summary statistics (which had undergone two rounds of LD pruning, first at  $r^2=0.6$  [independent SNPs], and another round of pruning at  $r^2 = 0.1$ , kb=250). In each plot, the top independent SNP for each locus is depicted as “Top lead SNP”, with a navy circle.

rs848293

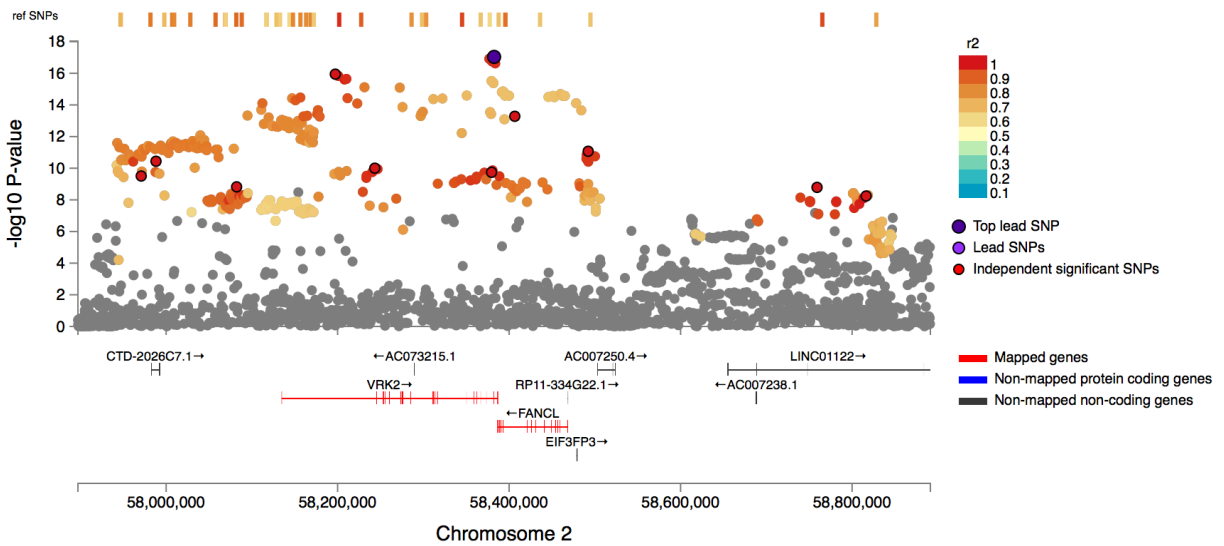

rs62340585

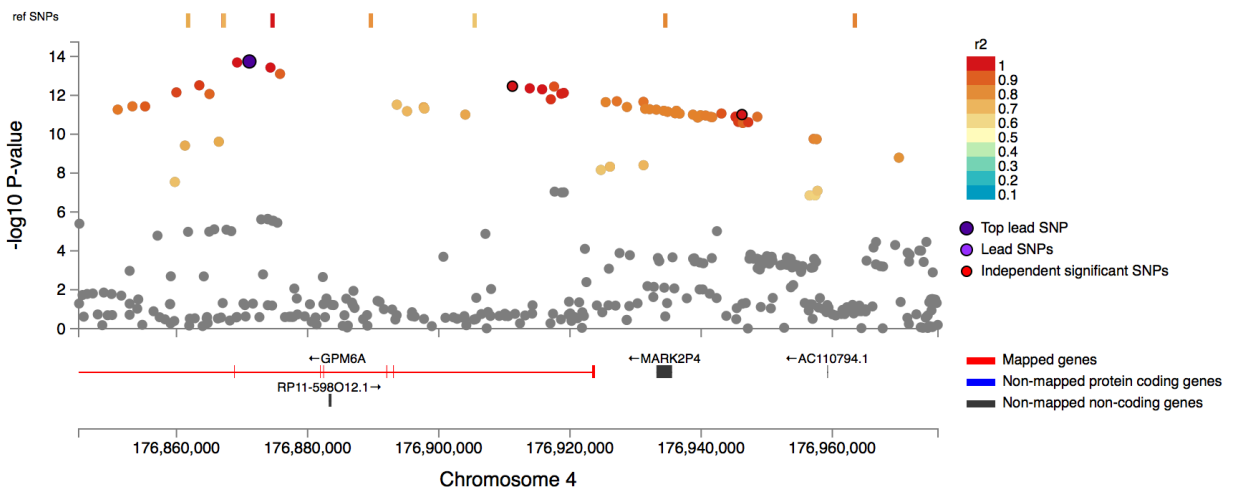

rs10168817

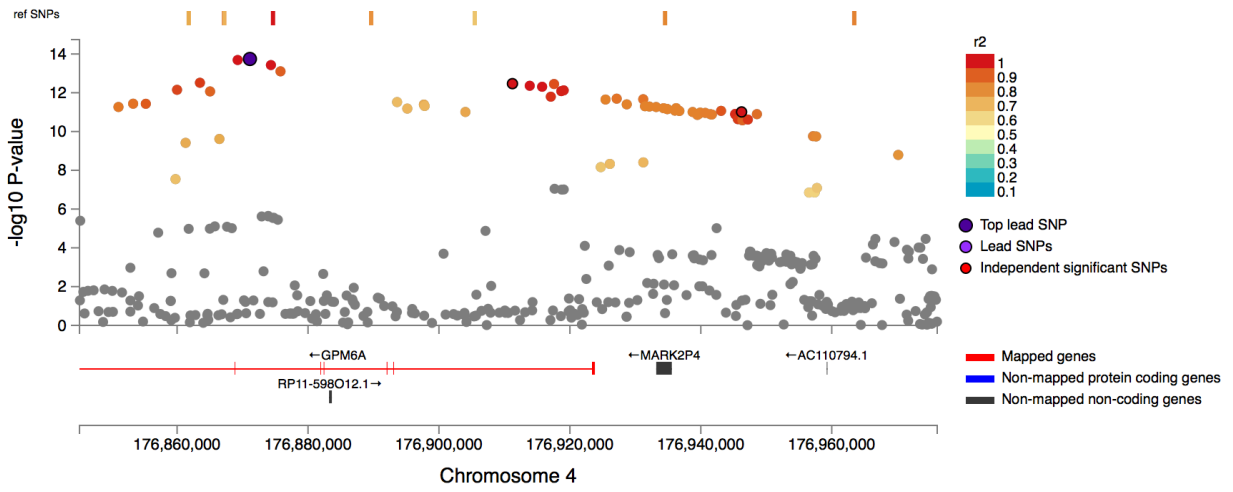

rs10779987

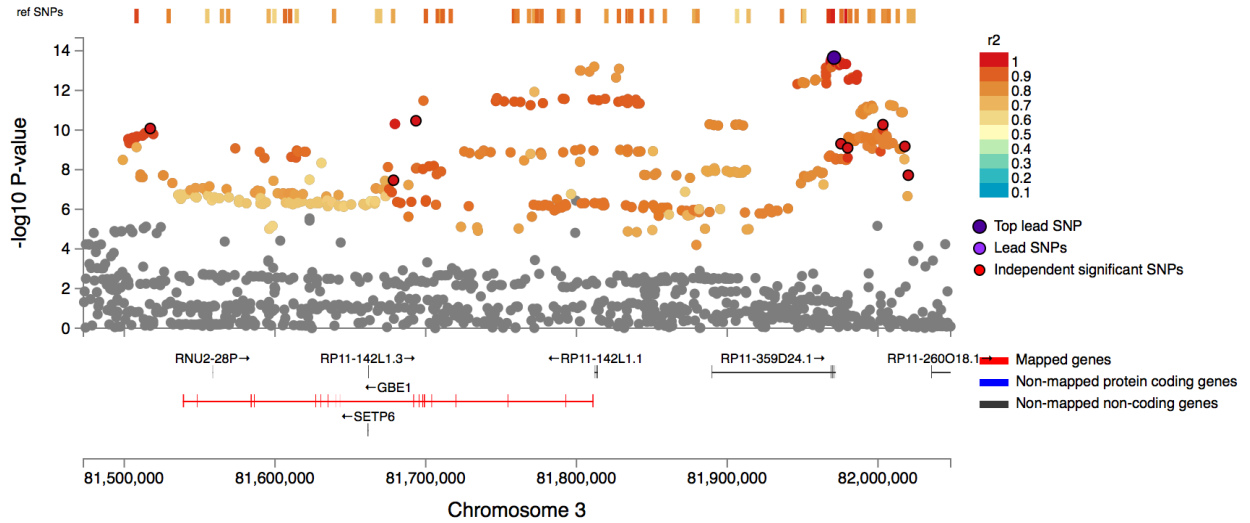

rs28392605

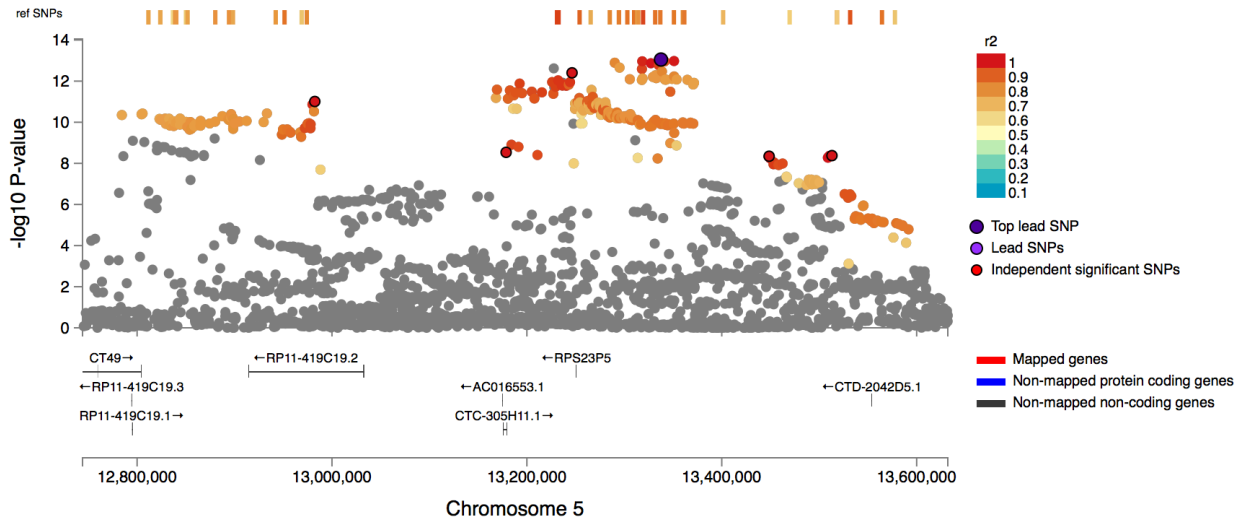

rs1832909

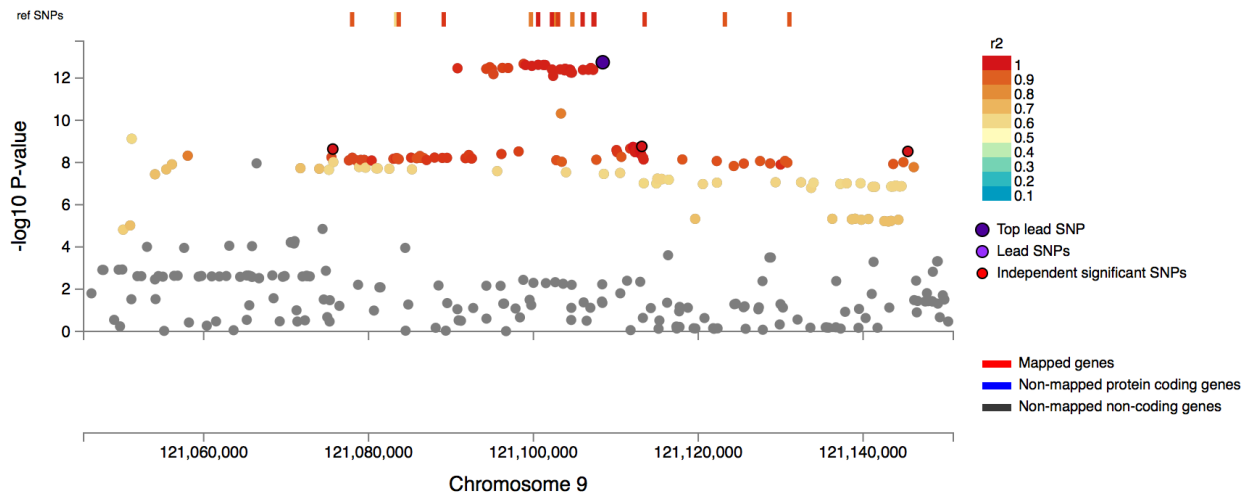

rs34762587

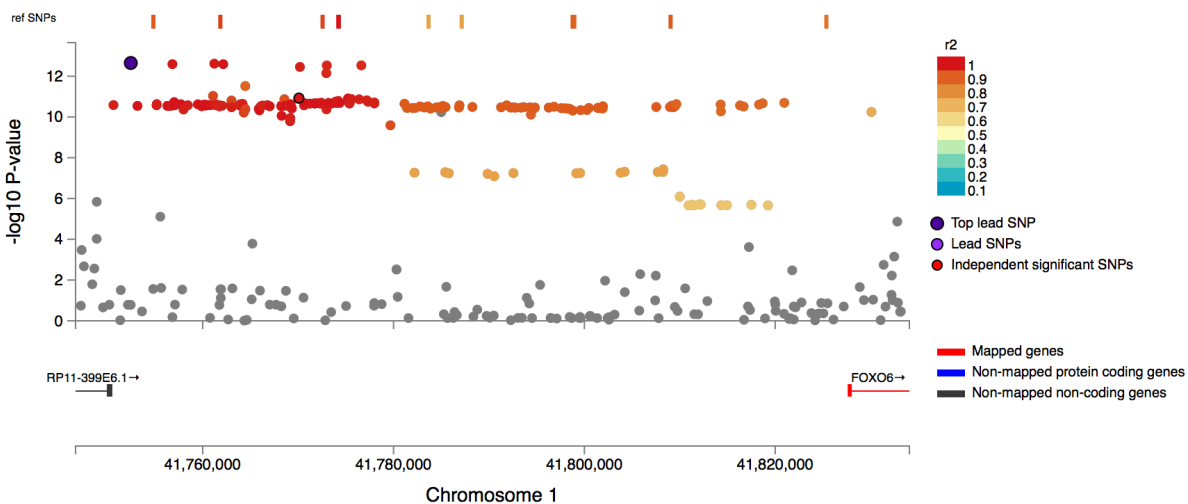

rs7542

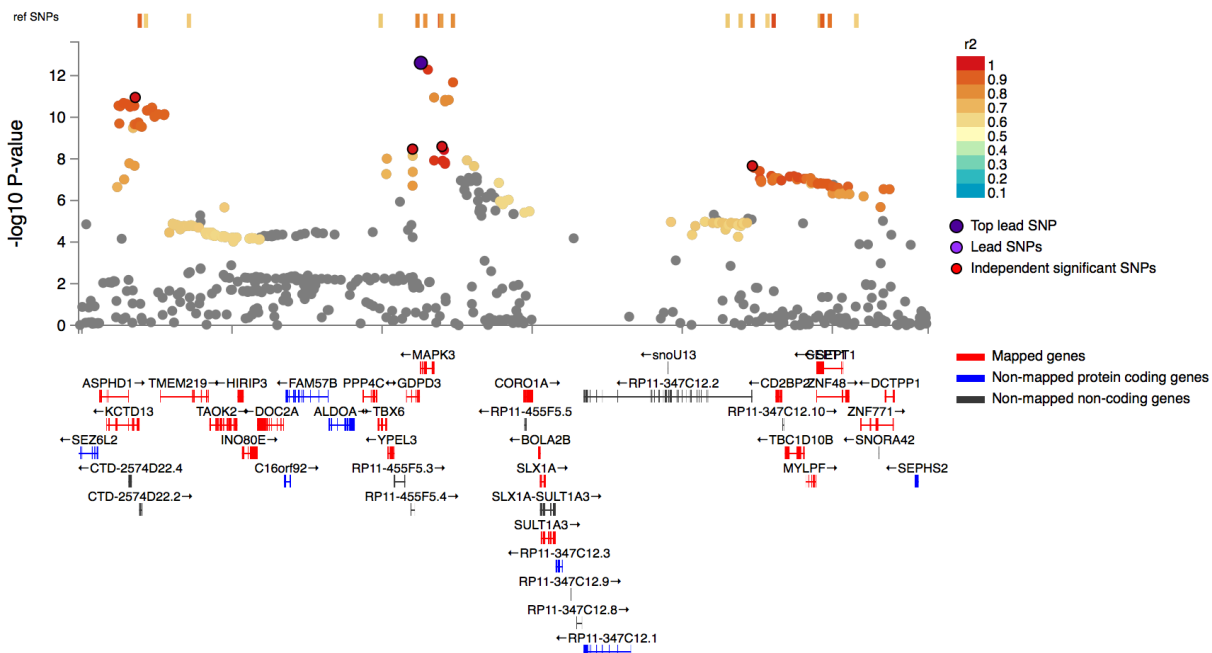

rs10875125

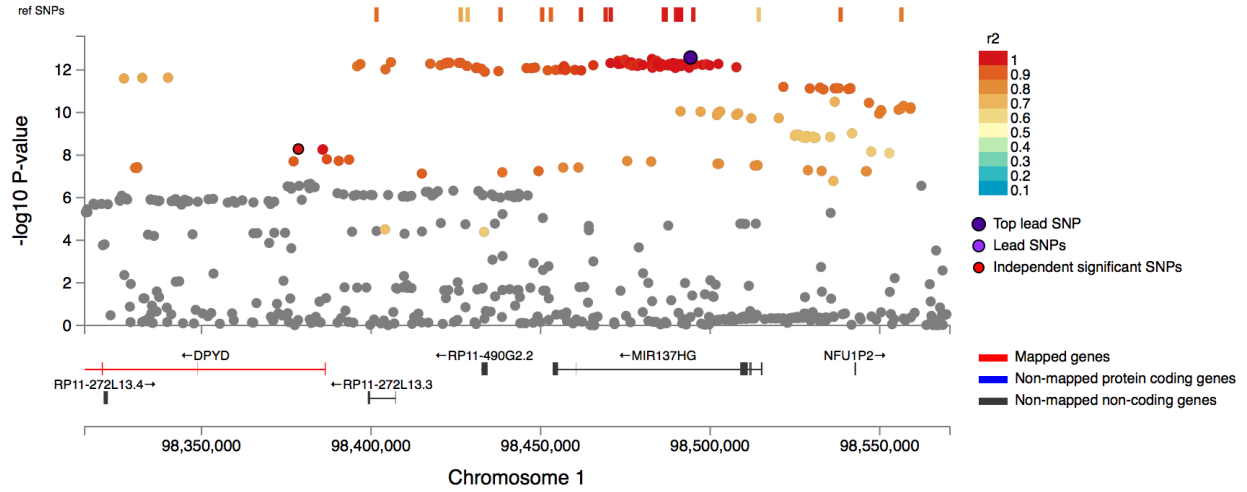

rs9400241

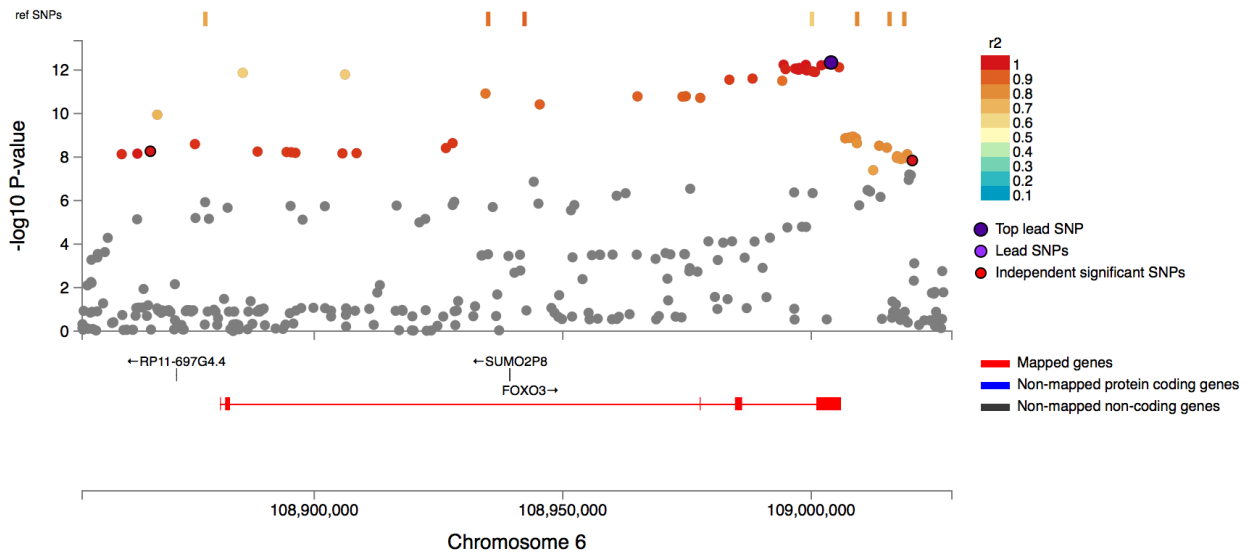

rs4792891

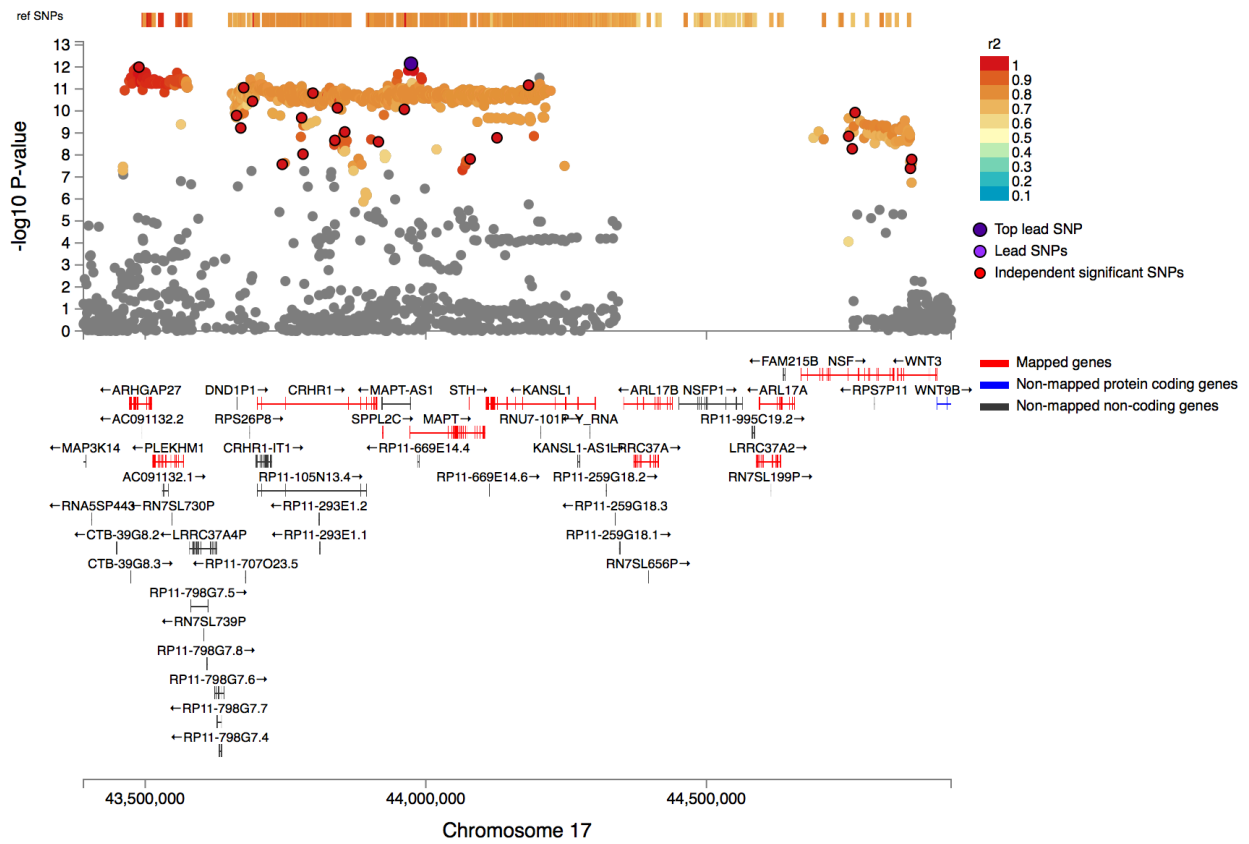

rs1468701

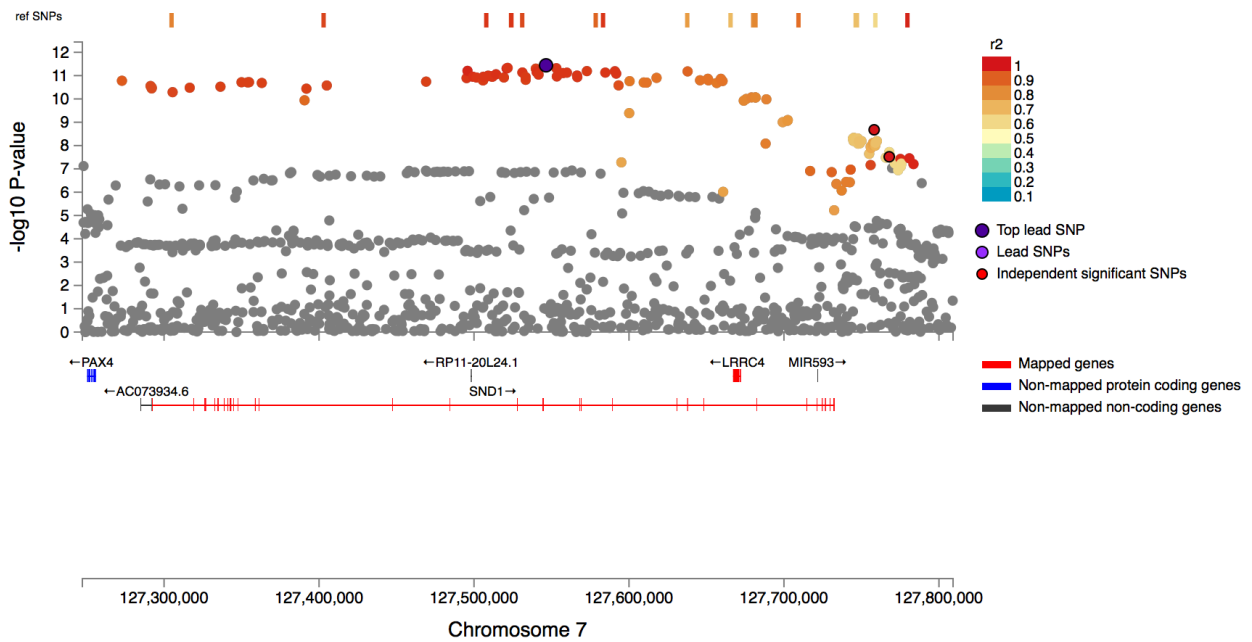

rs10848650

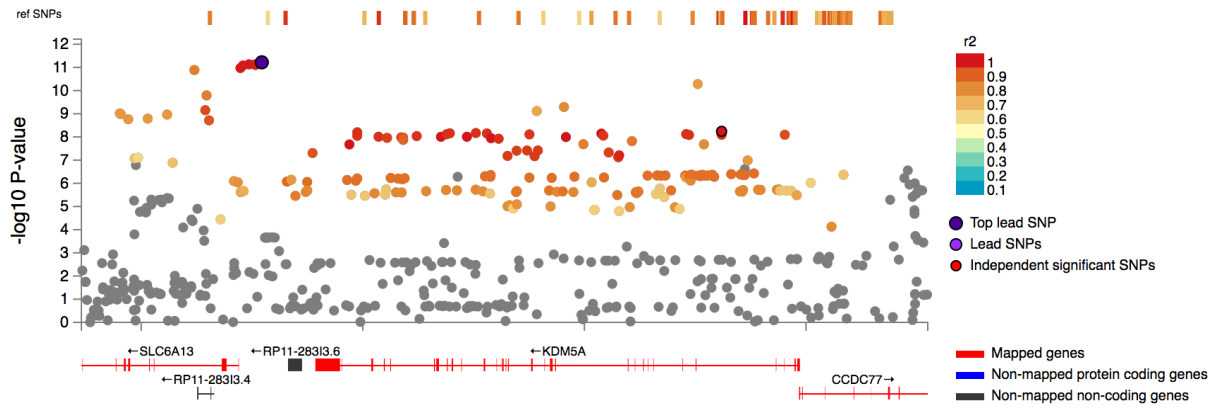

rs2635634

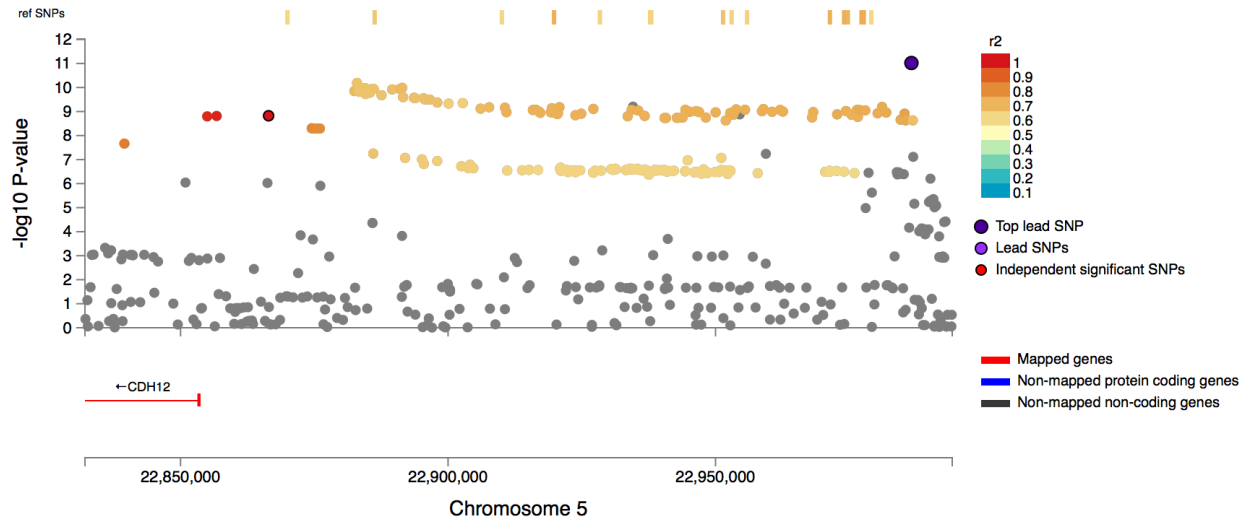

### rs9626920

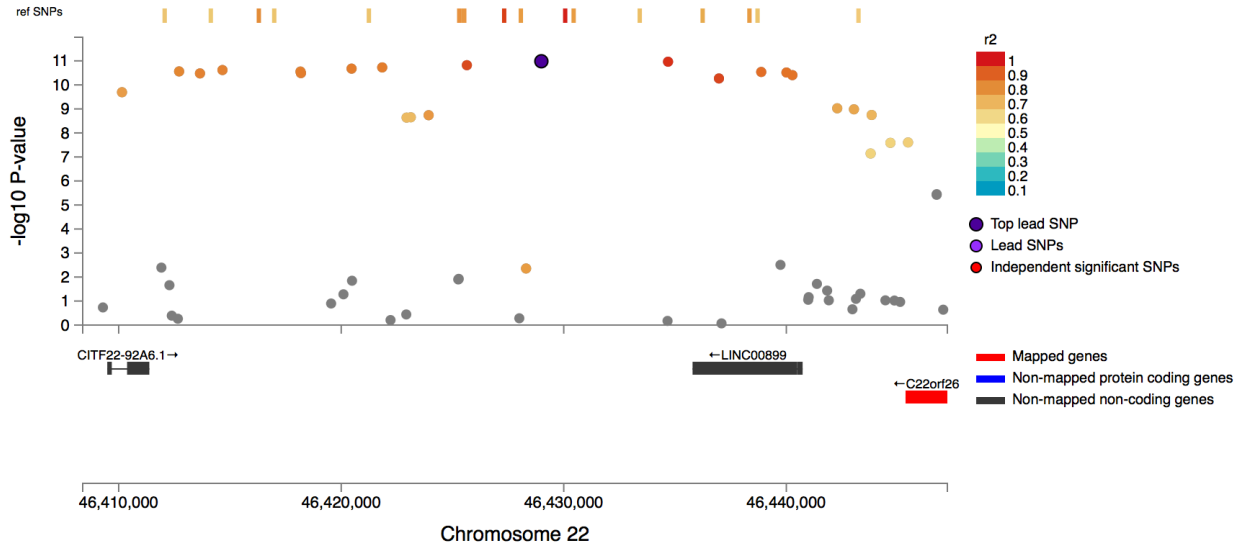

### rs764299

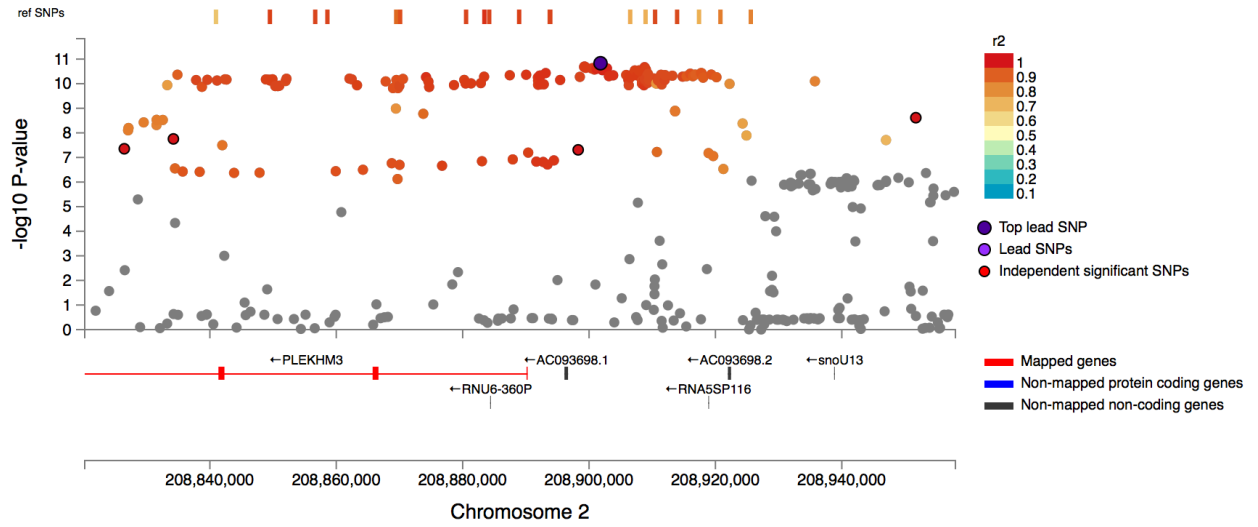



rs10984506

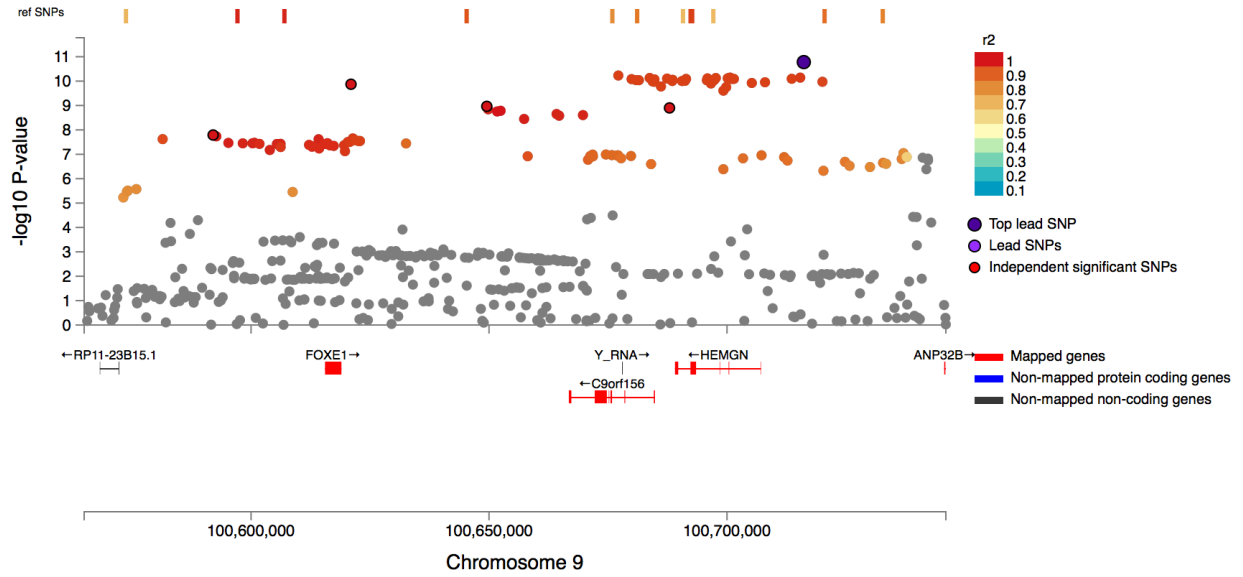

rs1426371

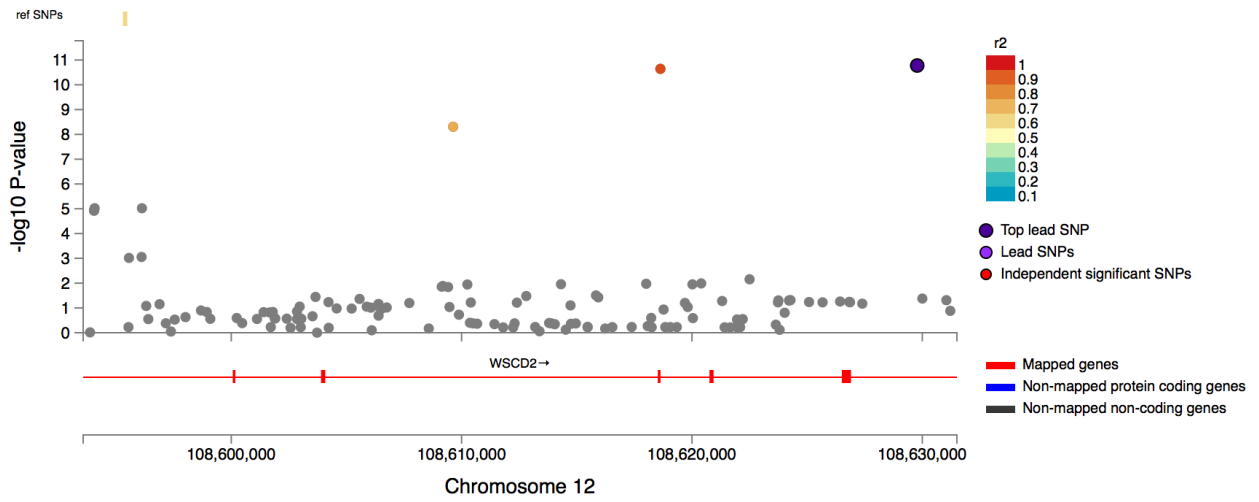

### rs12913592

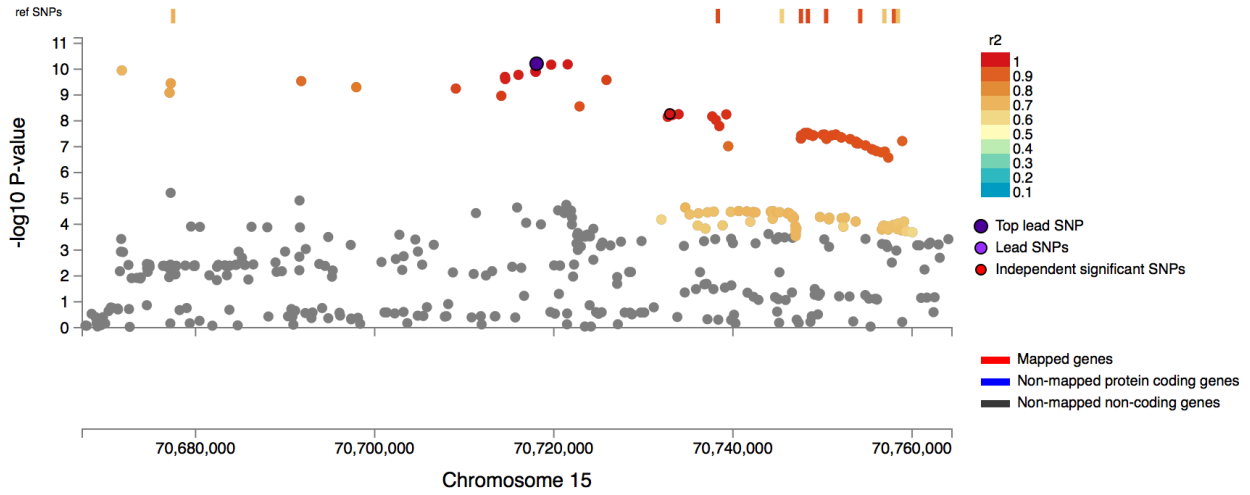

### rs72700870

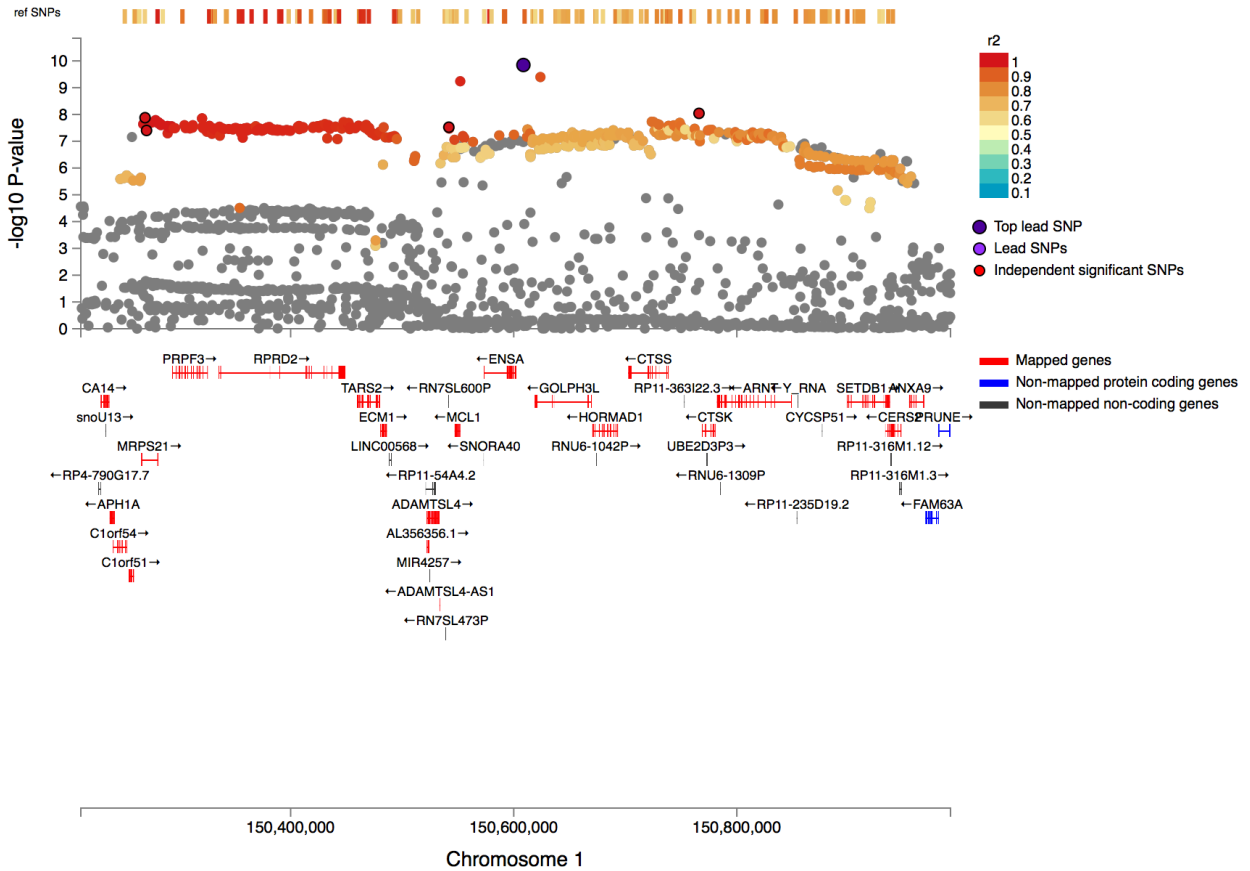

rs9388171

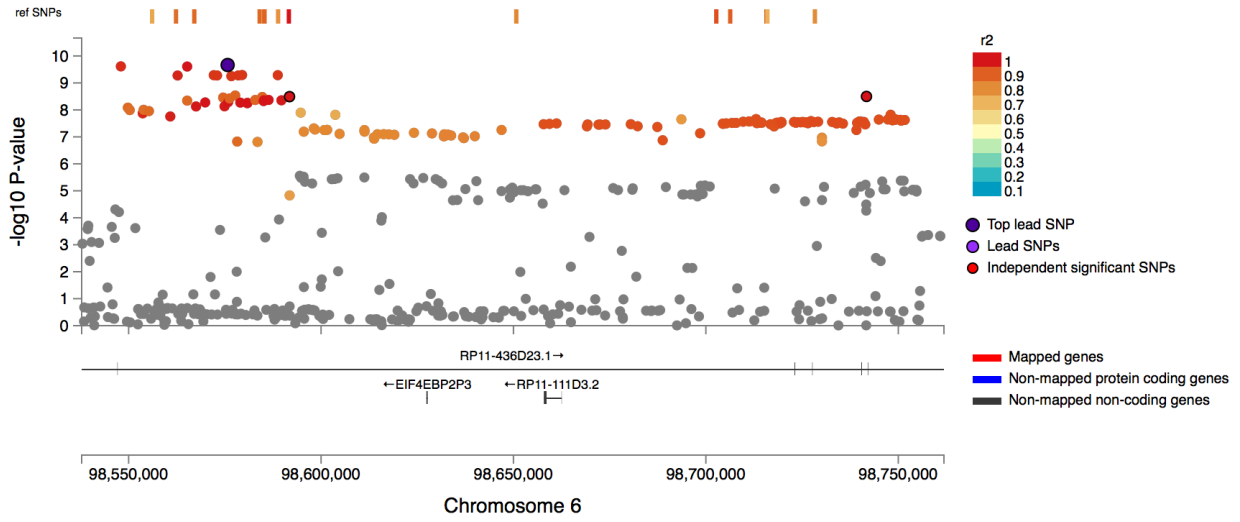

rs6572878

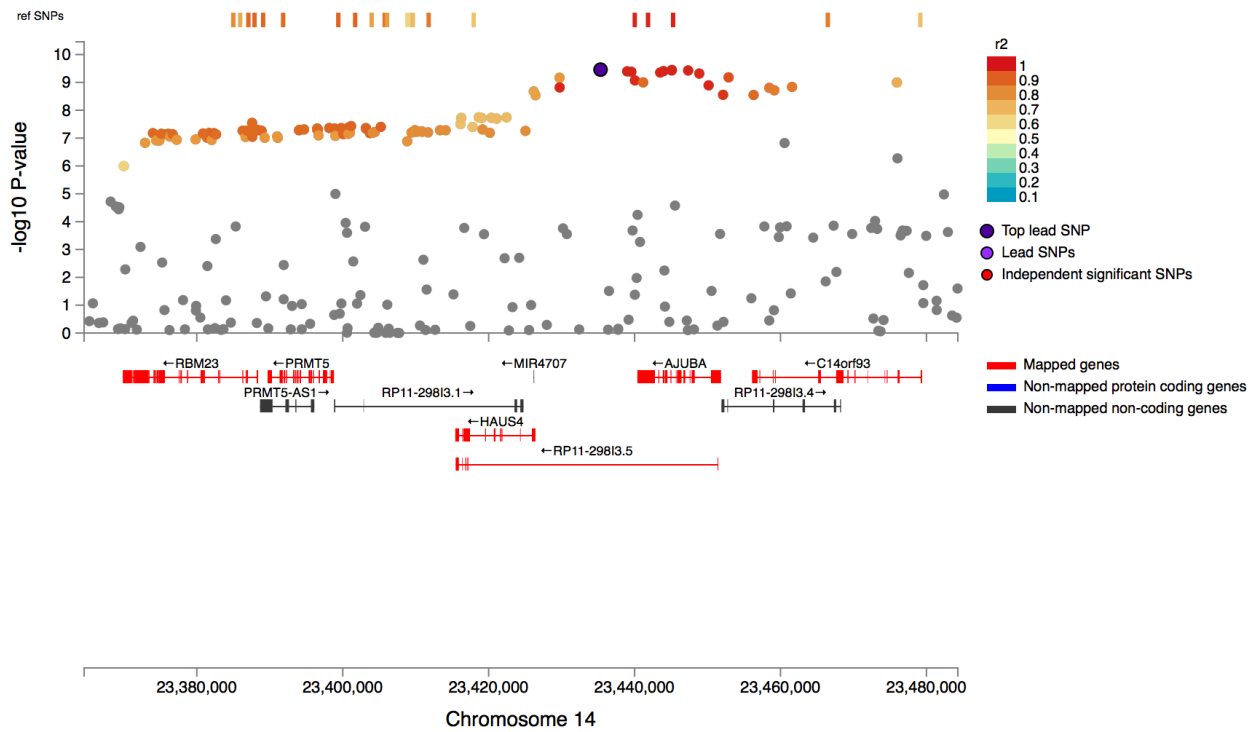

rs11210206

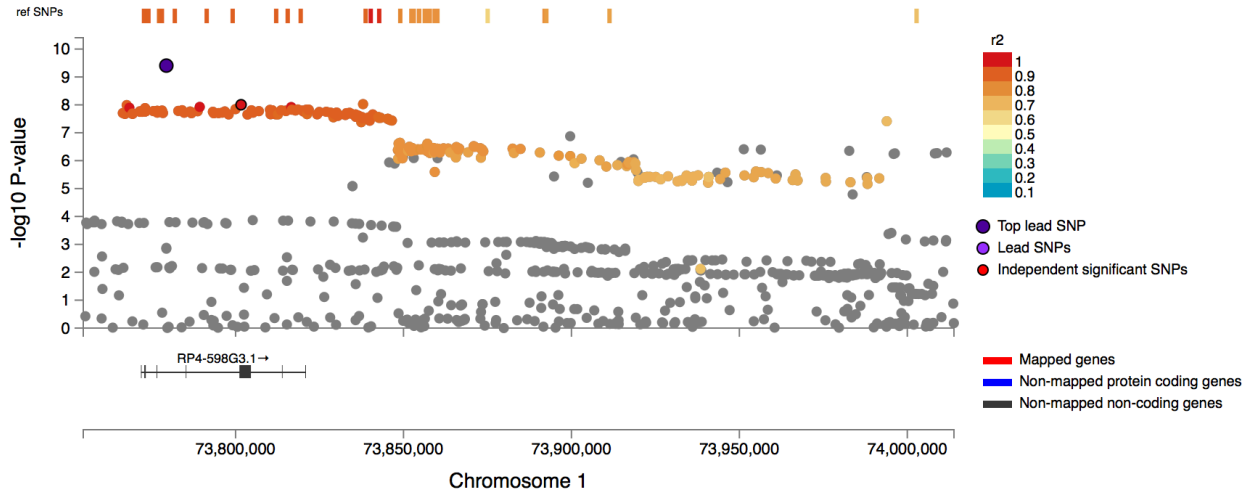

rs72633496

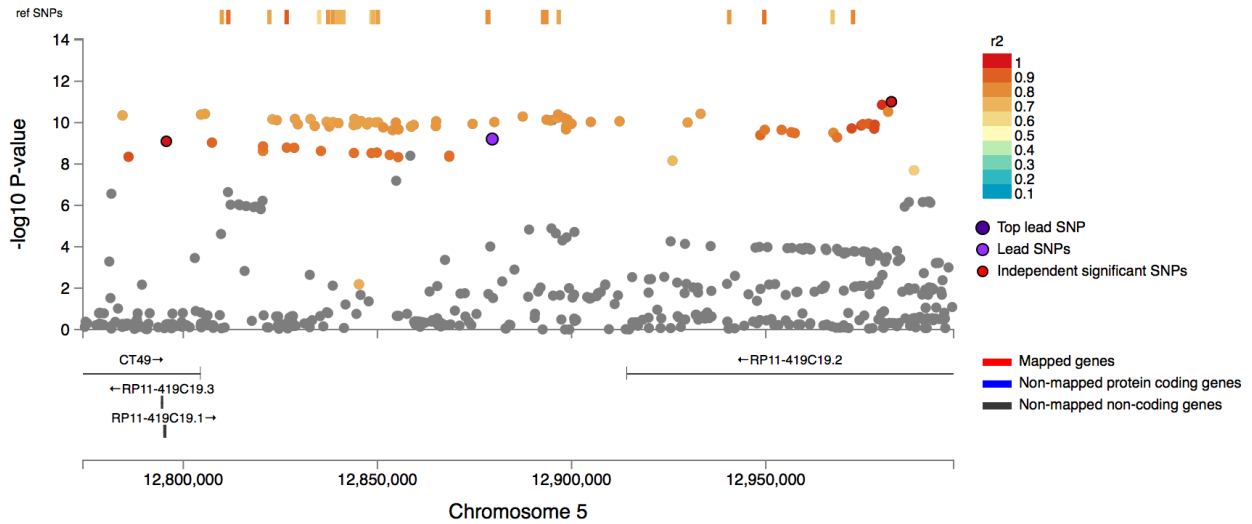

rs7586405

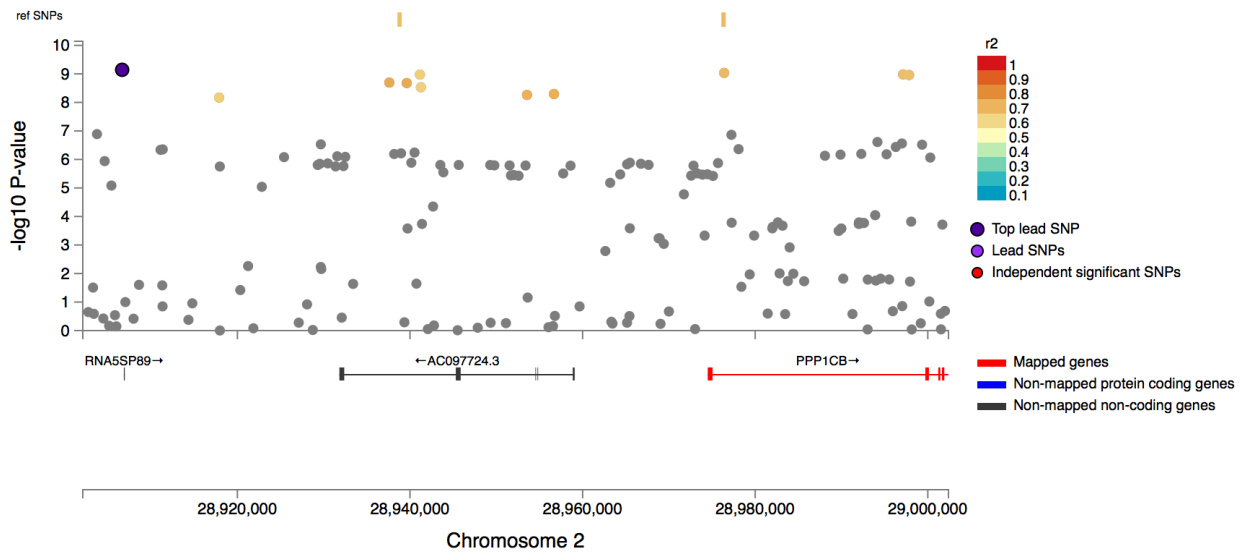

rs3024293

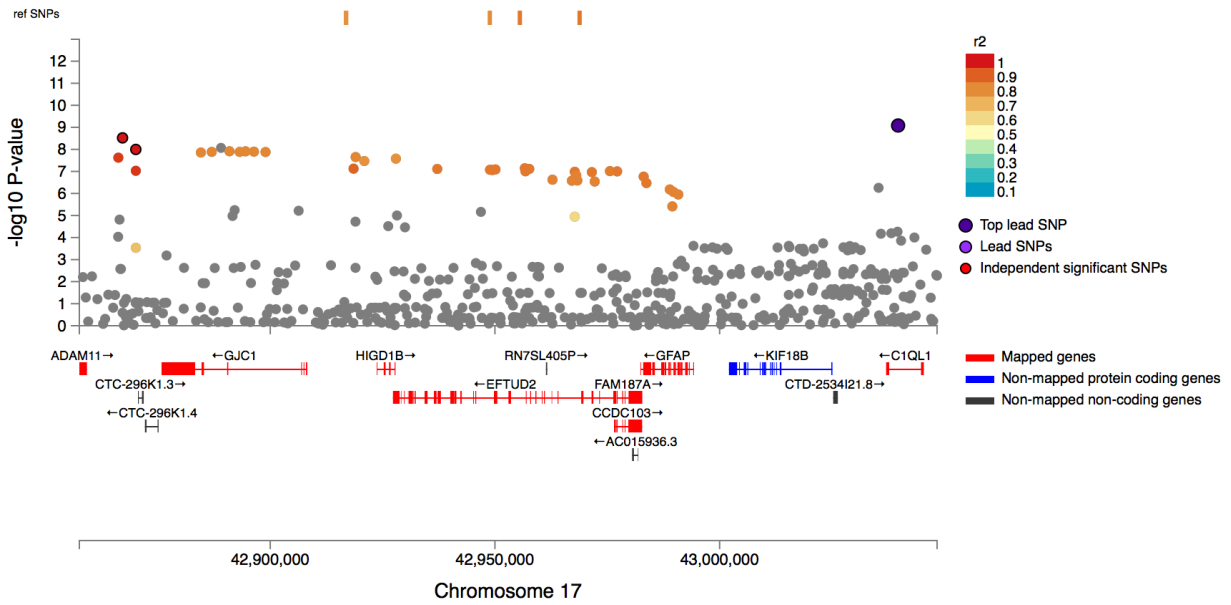

rs2061843

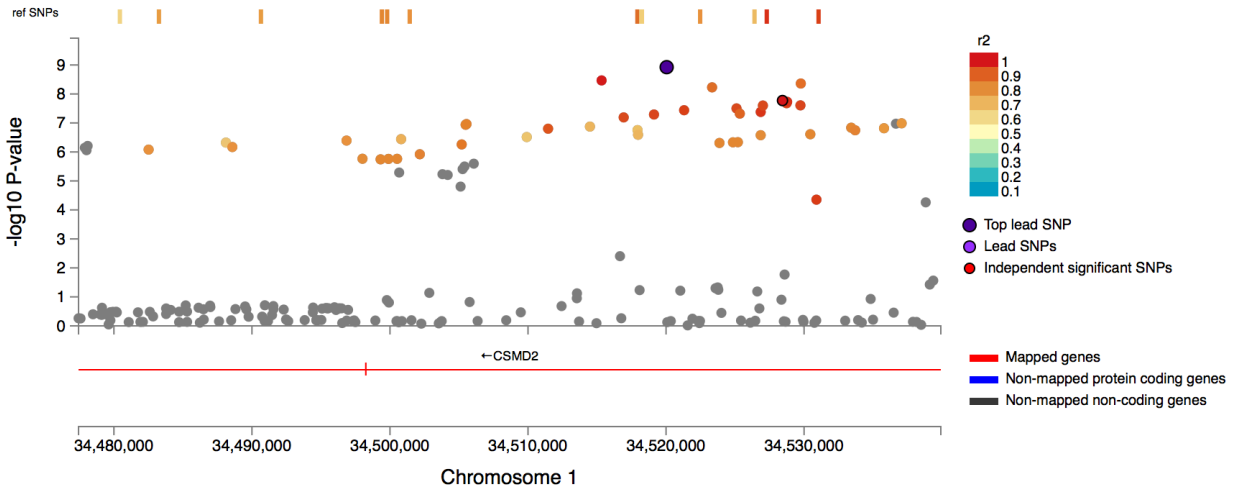

rs1349028

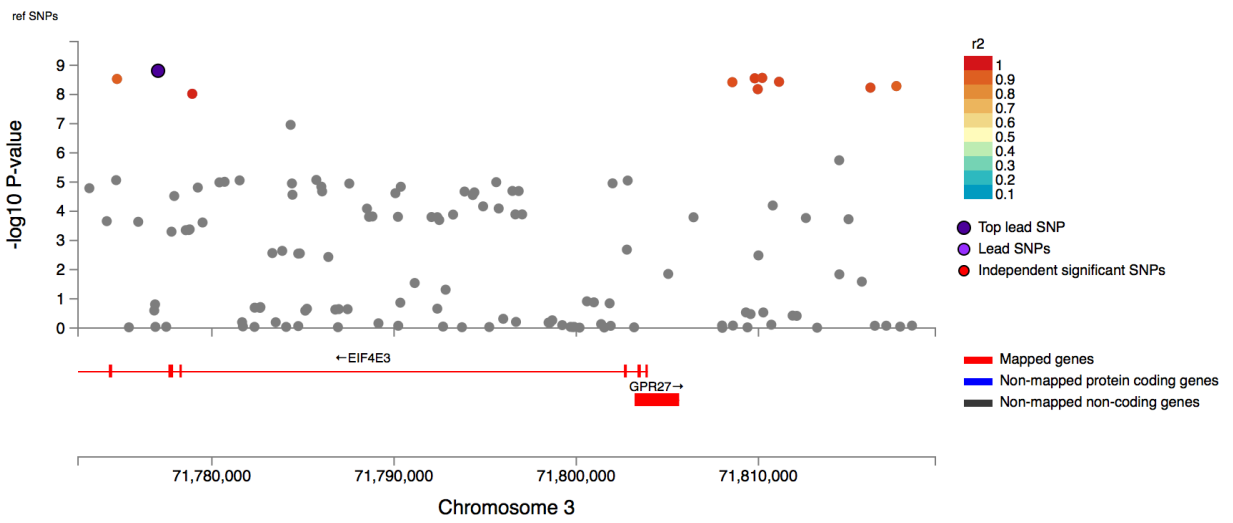

rs4443239

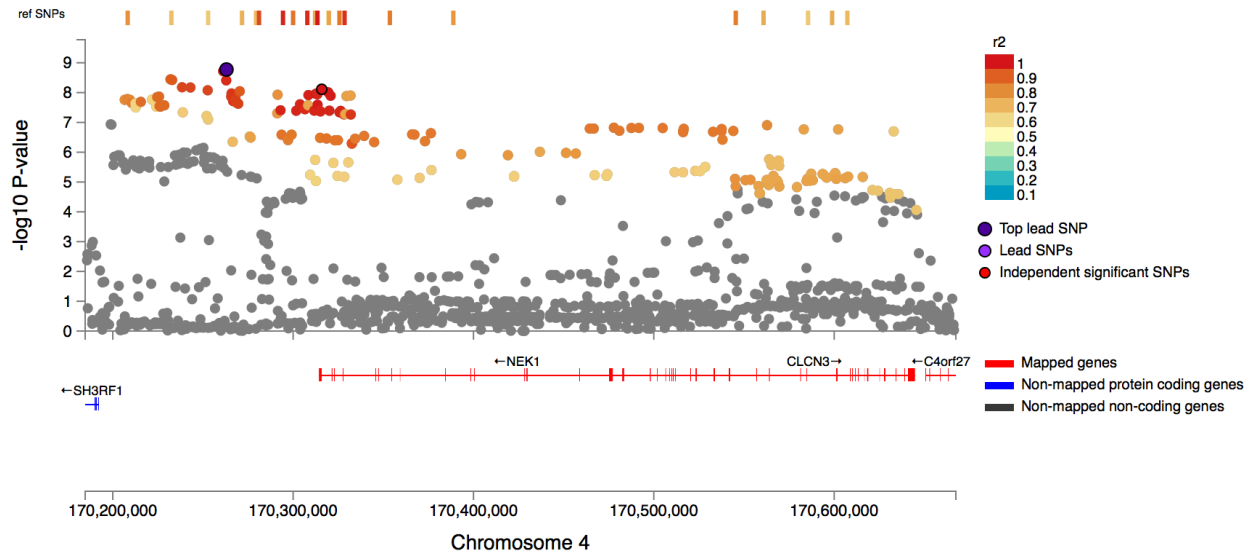

rs1901739

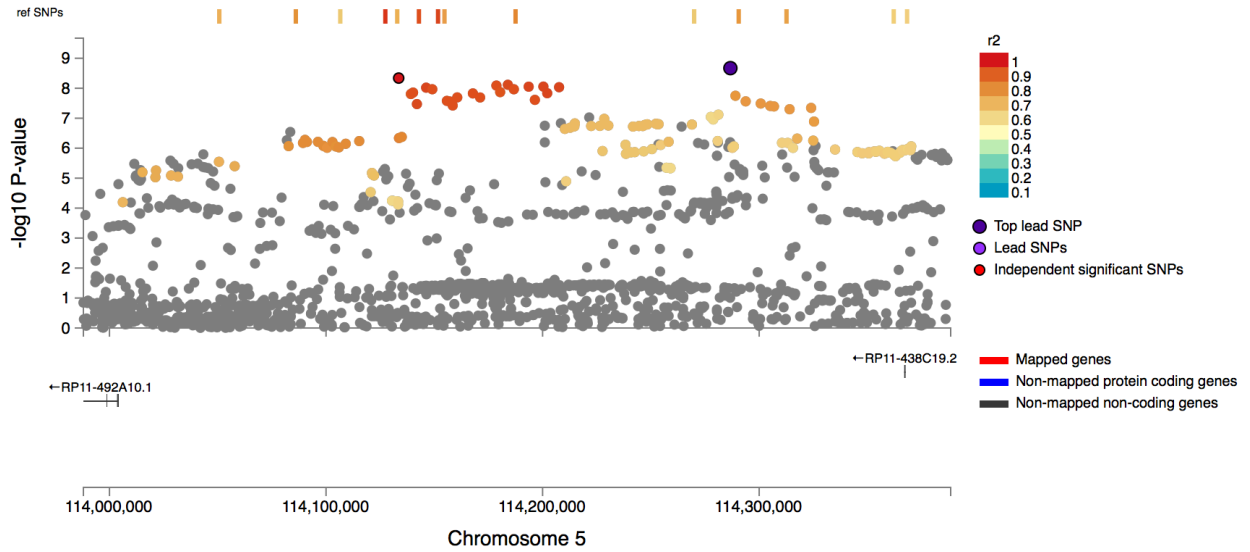

rs55678522

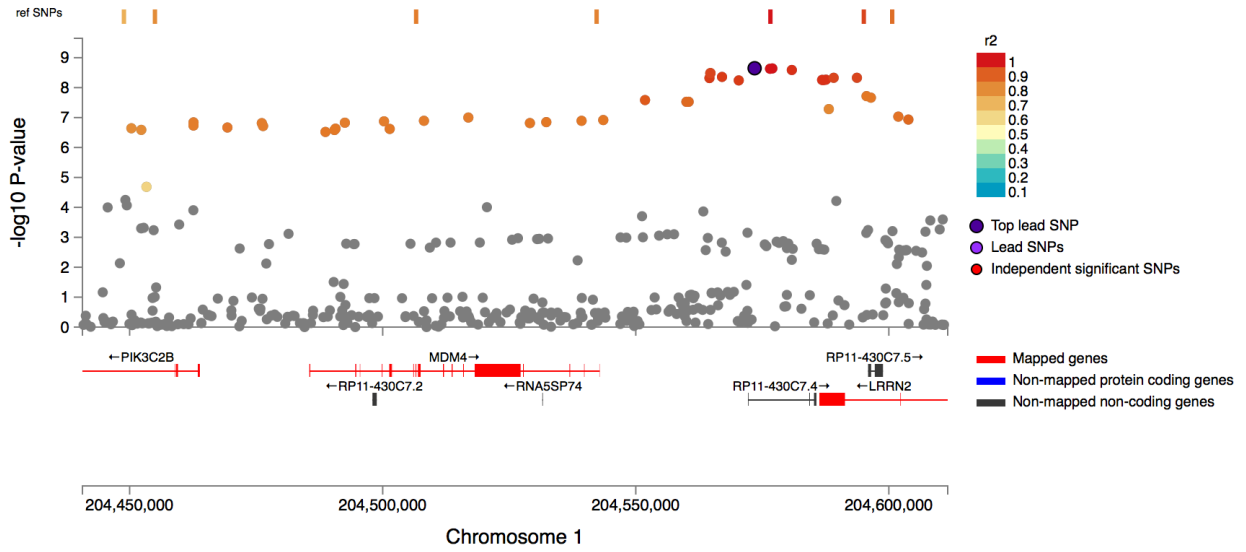

rs8079923

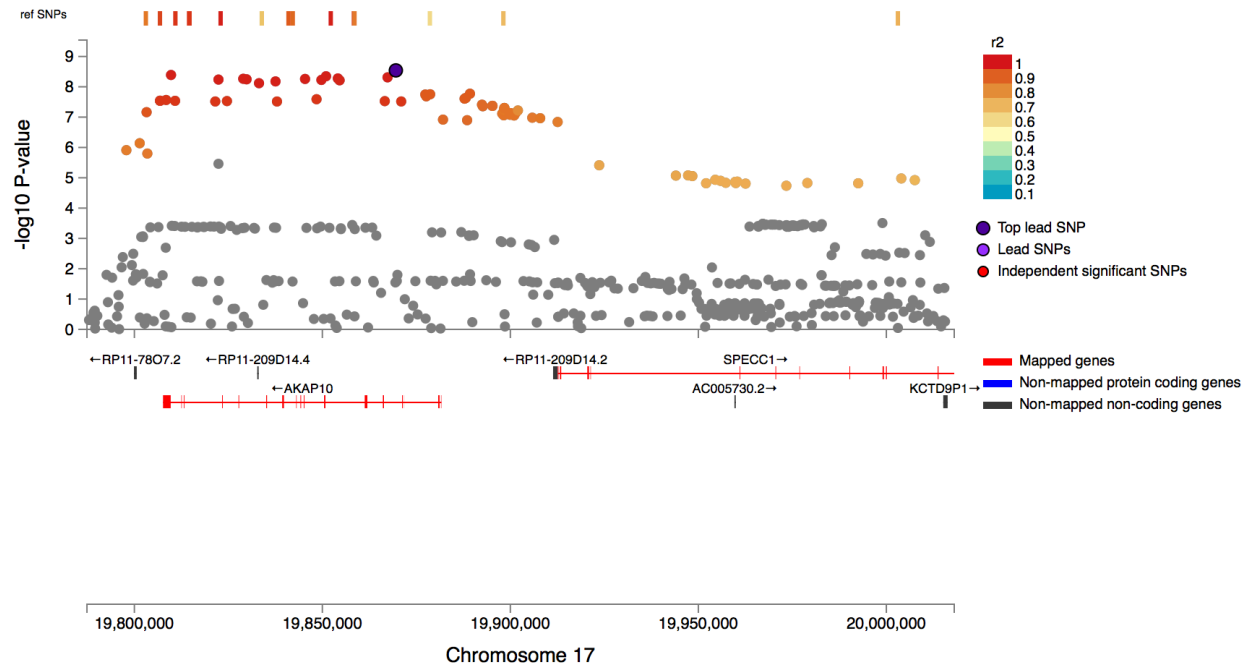



rs7501911

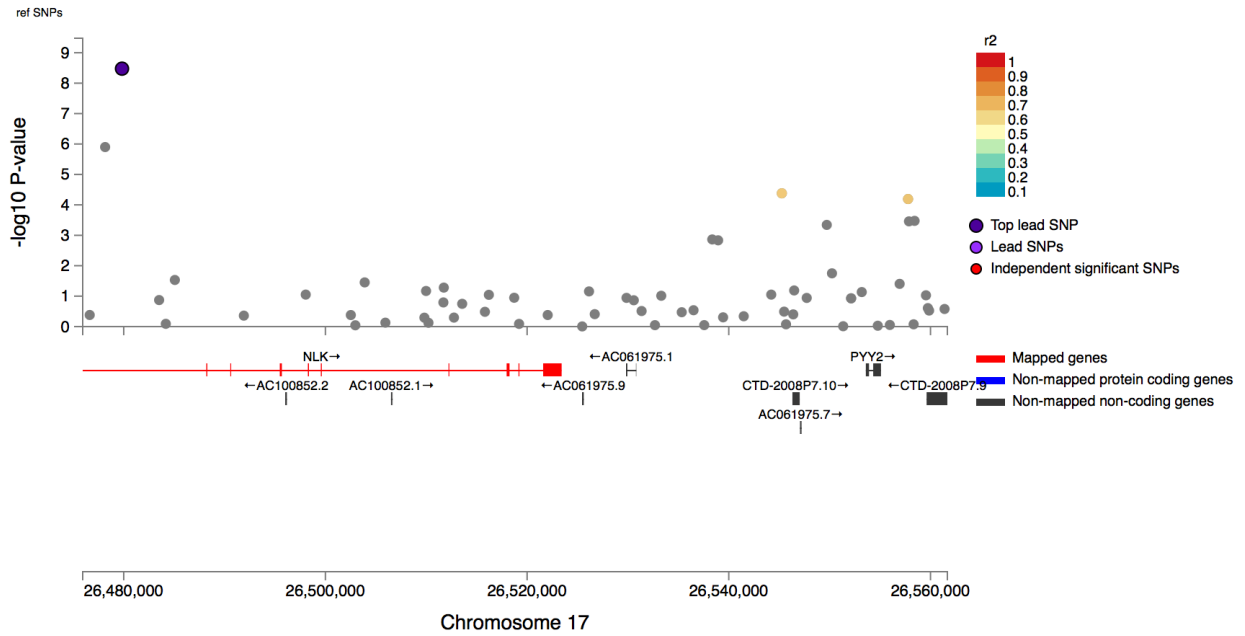

rs6087848

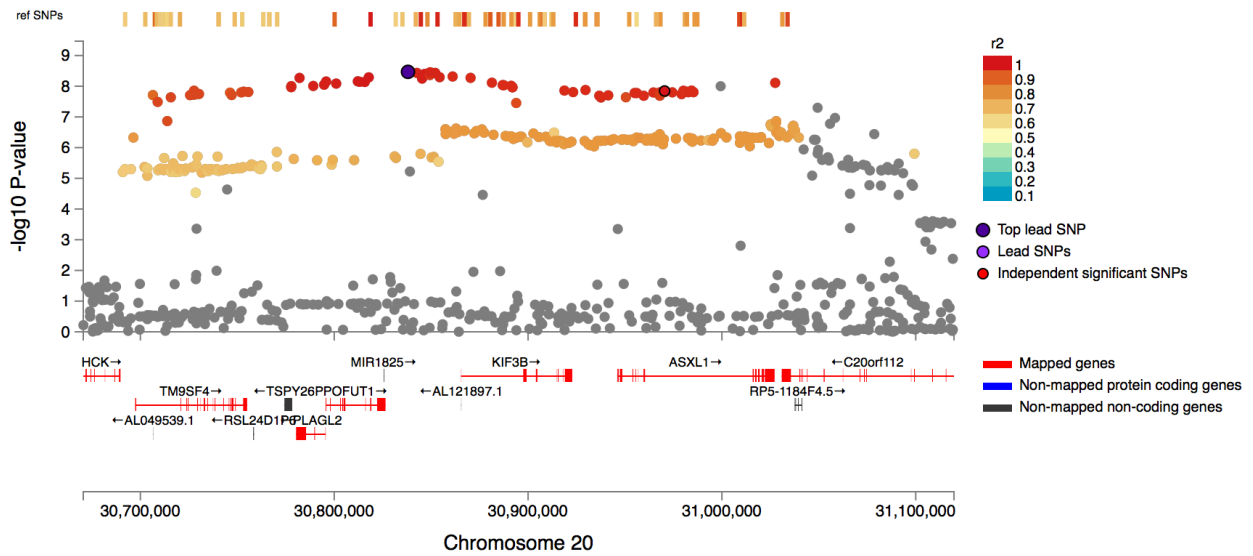

rs10744255

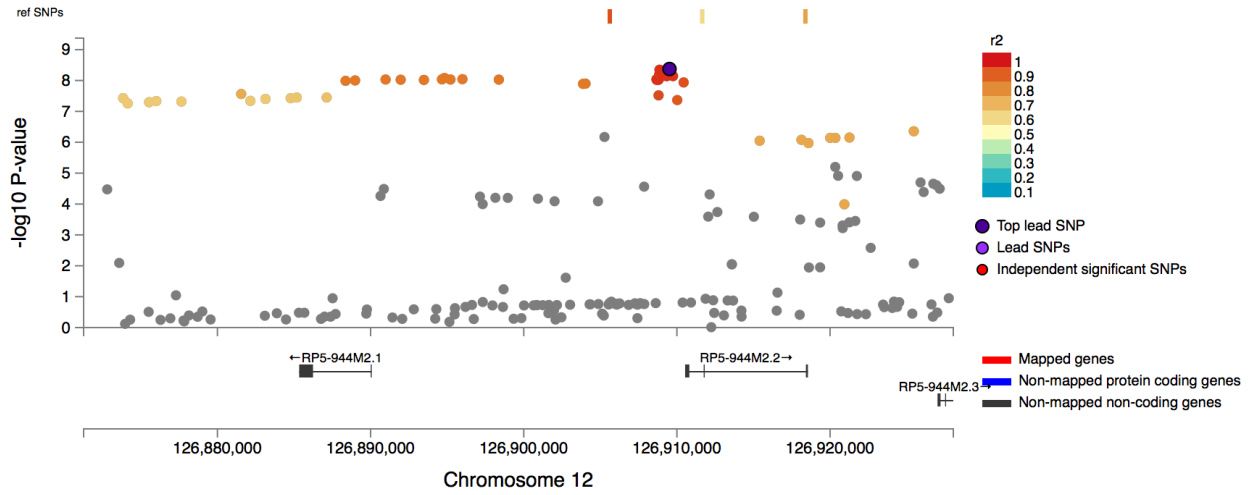

rs13163173

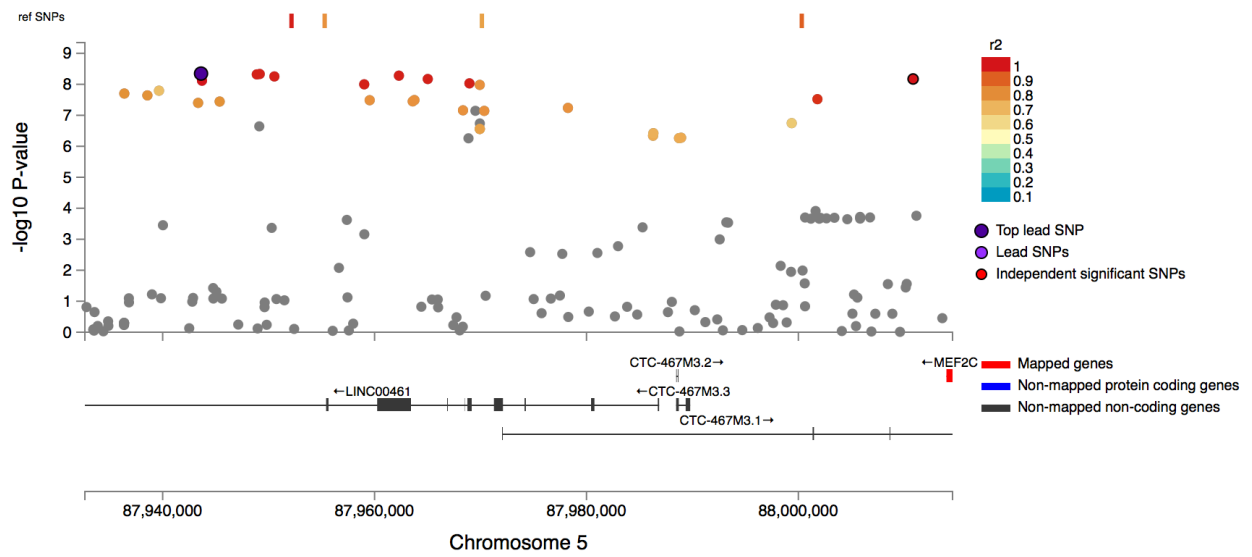

rs2819333

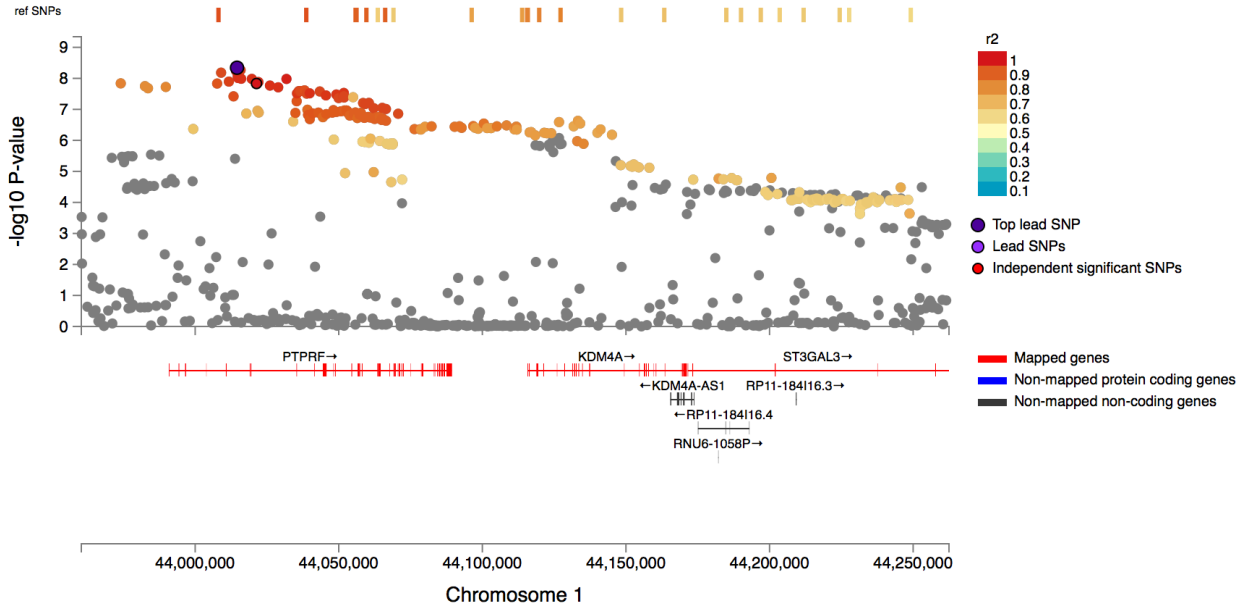

rs2453873

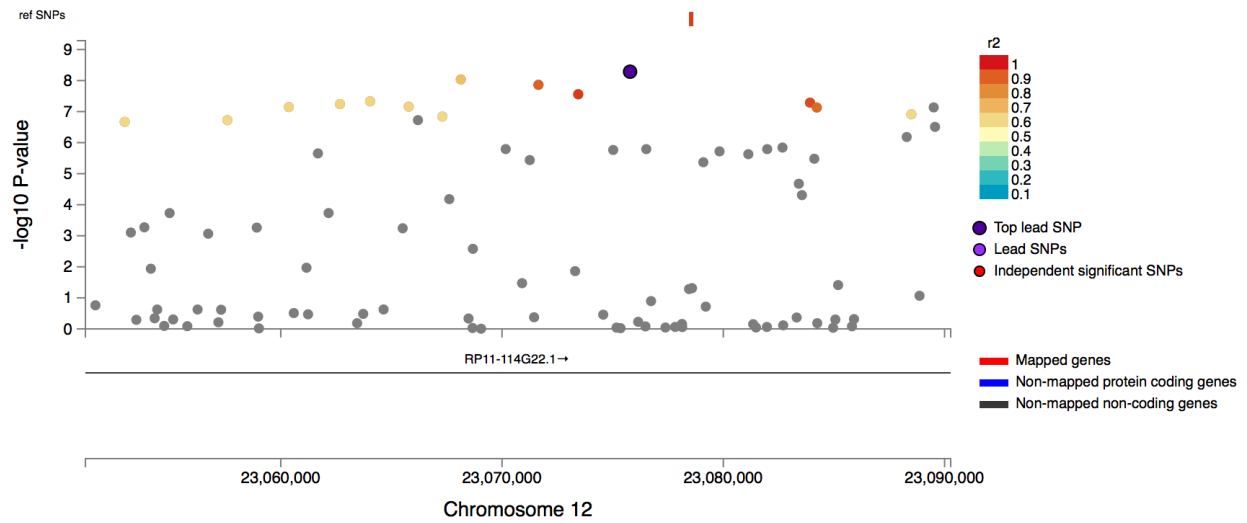

rs67264739

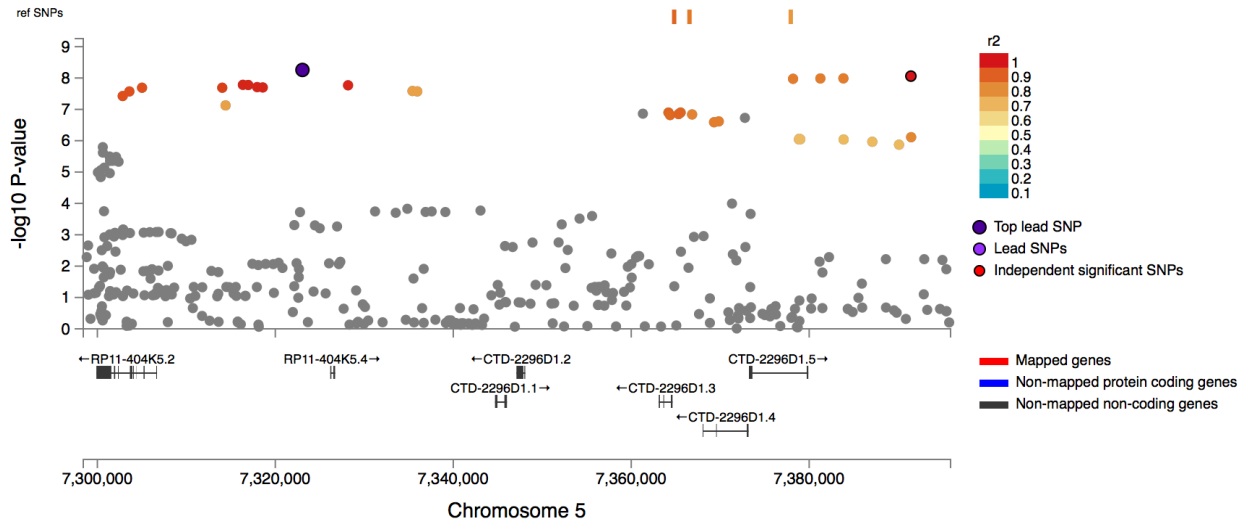

rs2284901

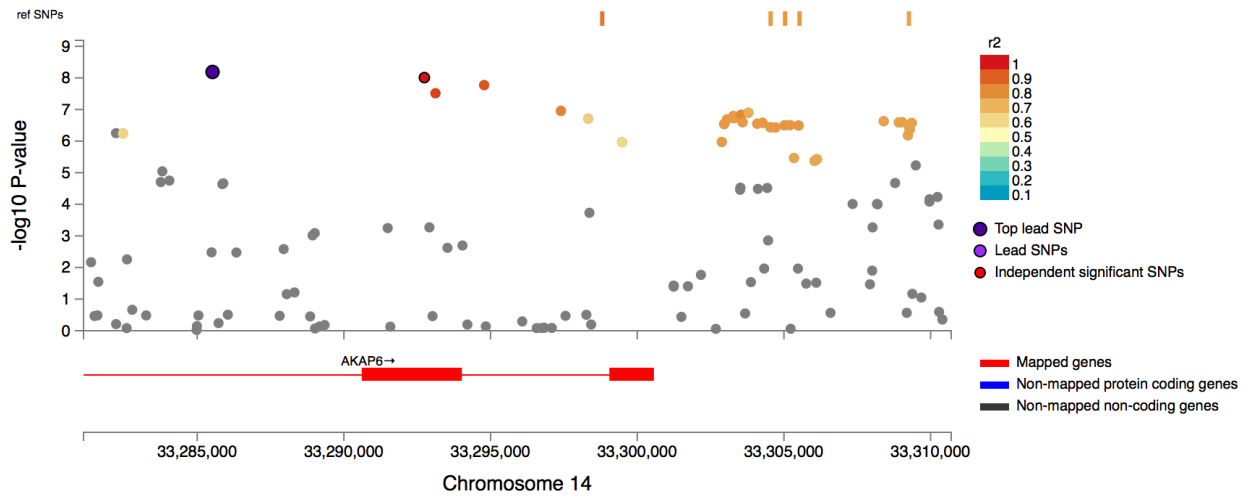

rs1596431

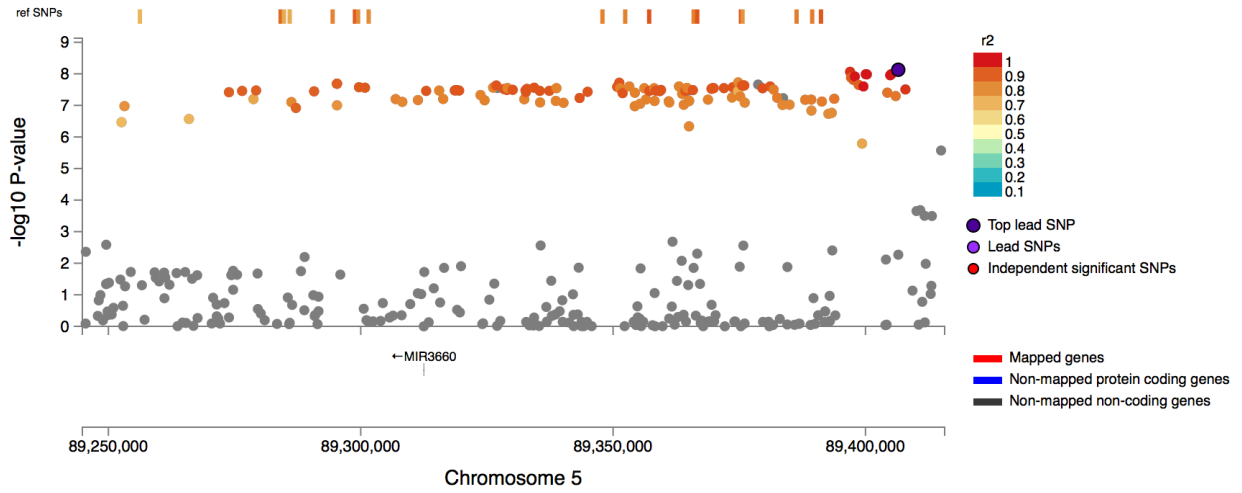

rs10978661

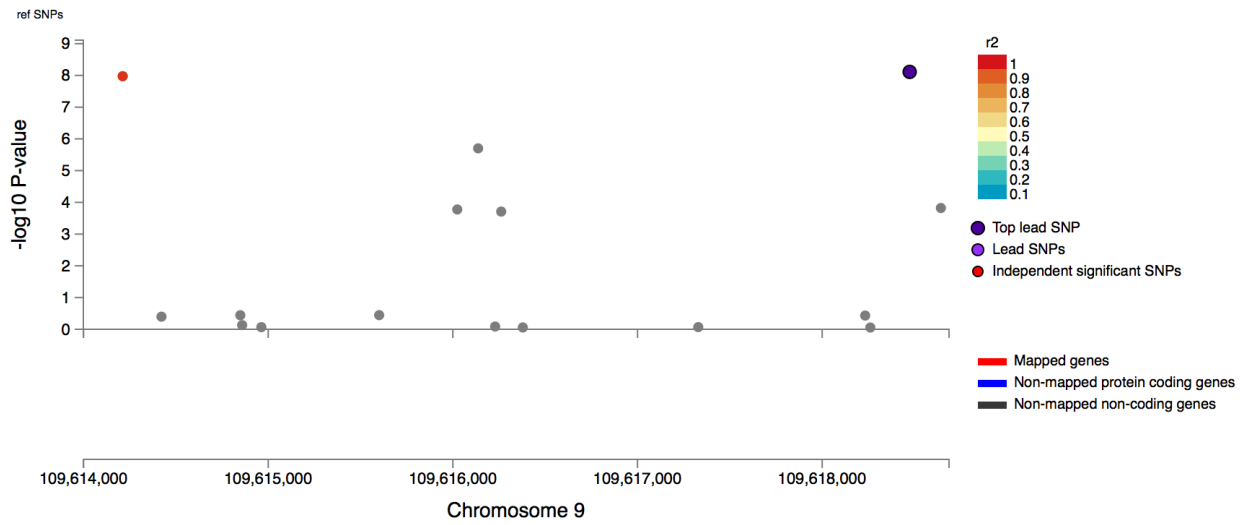

rs4263335

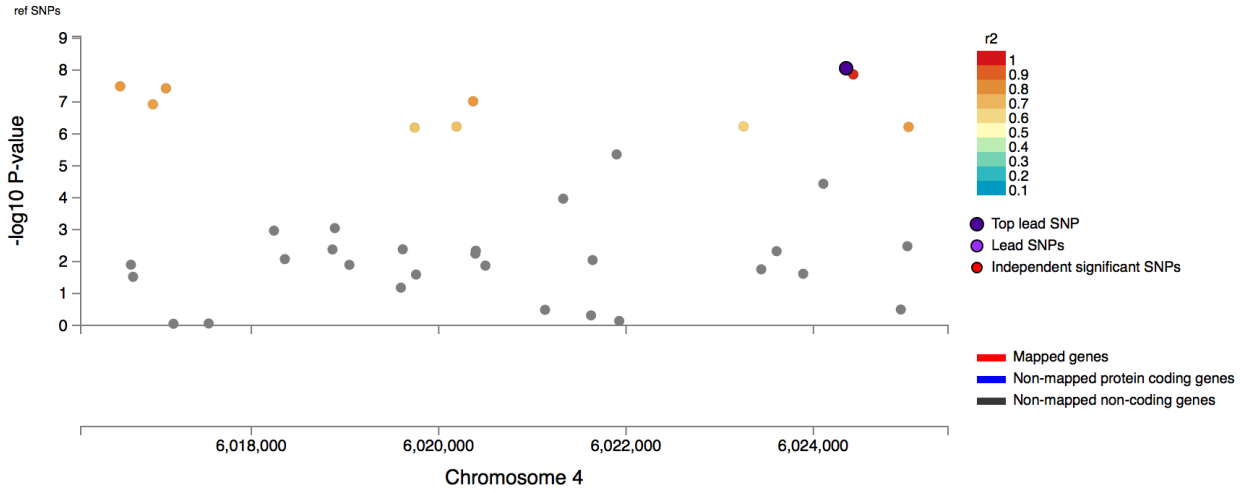

rs7939759

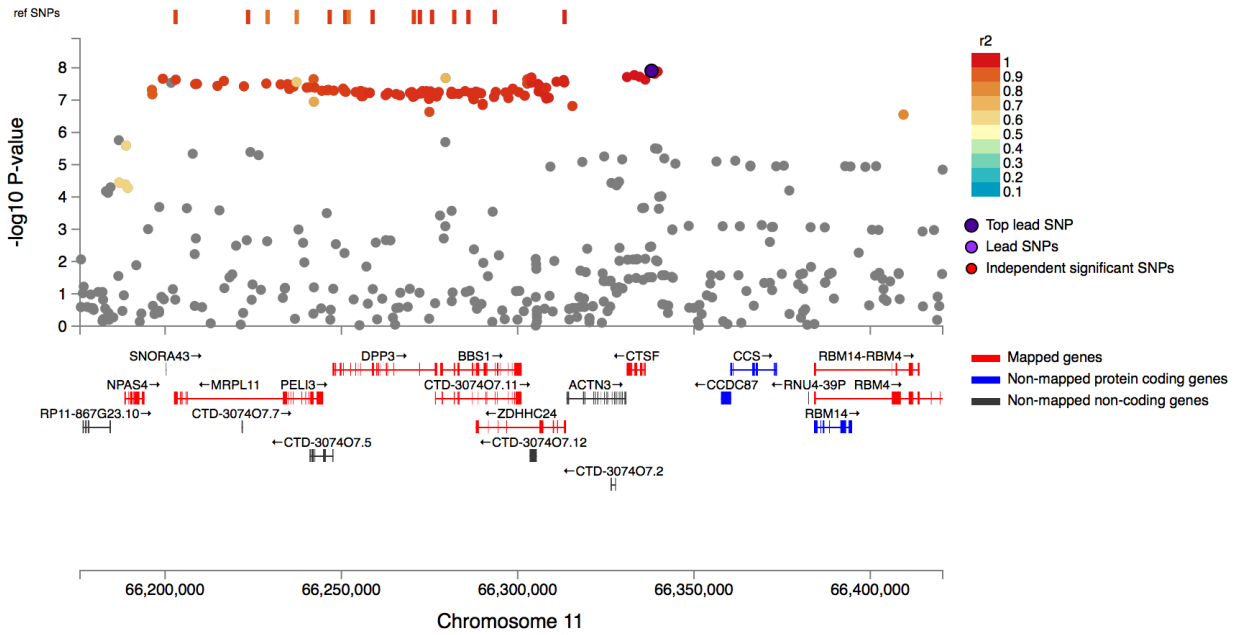

rs9710427

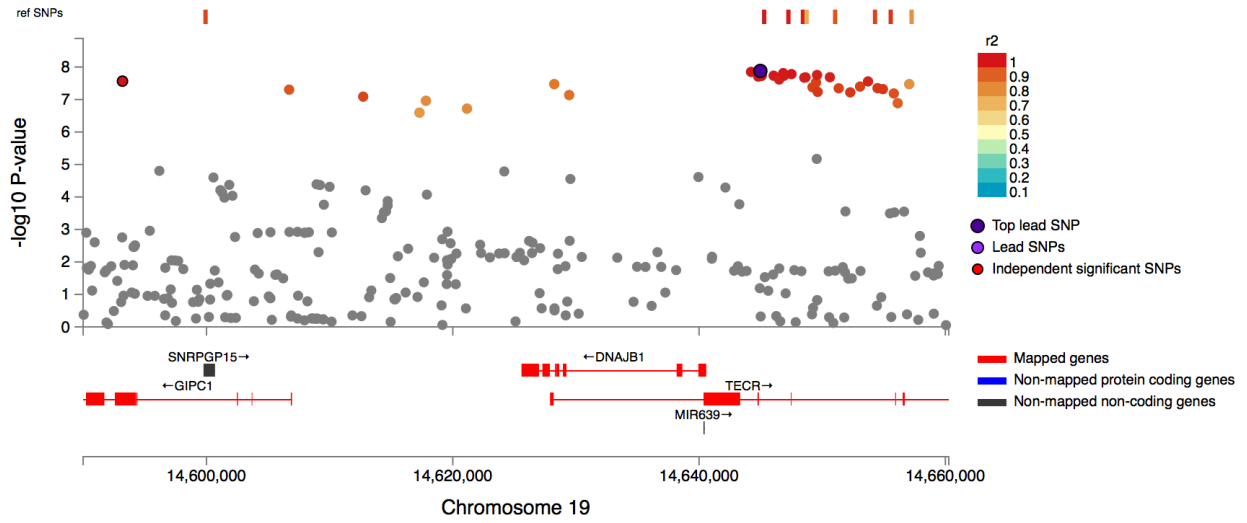

rs12638746

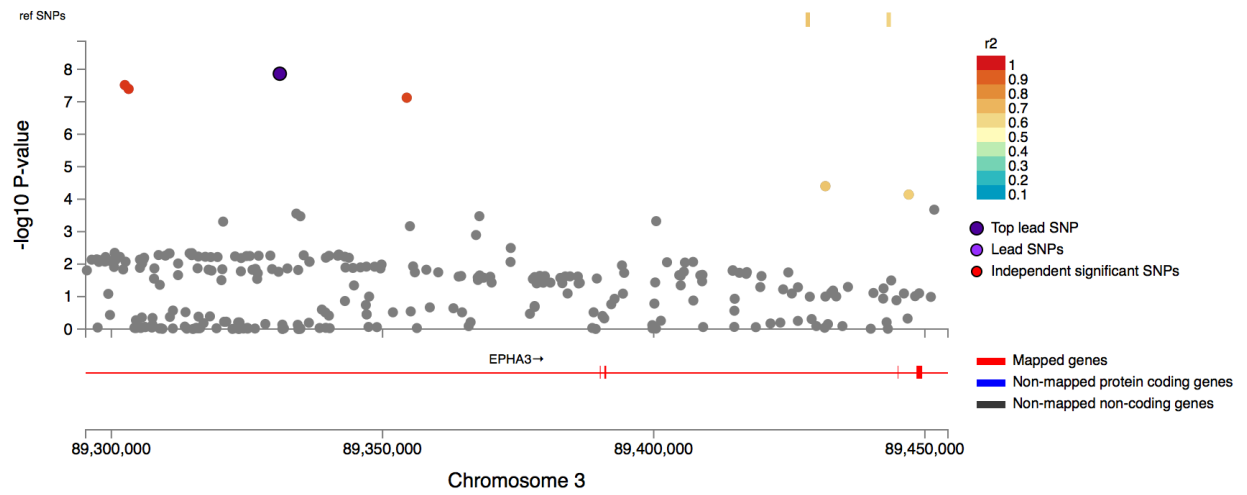

rs12909047

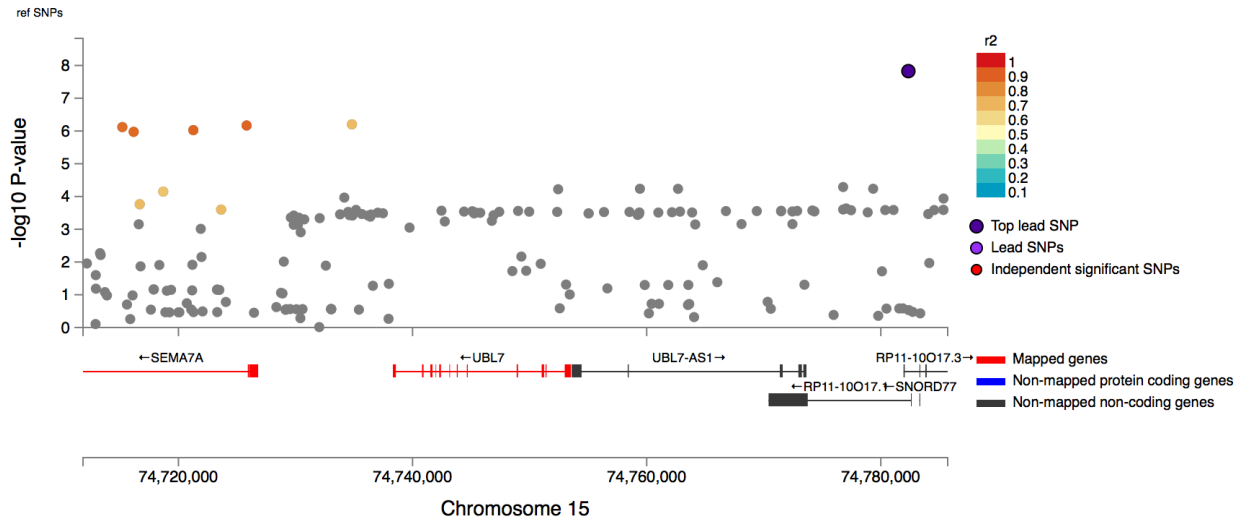

rs2505344

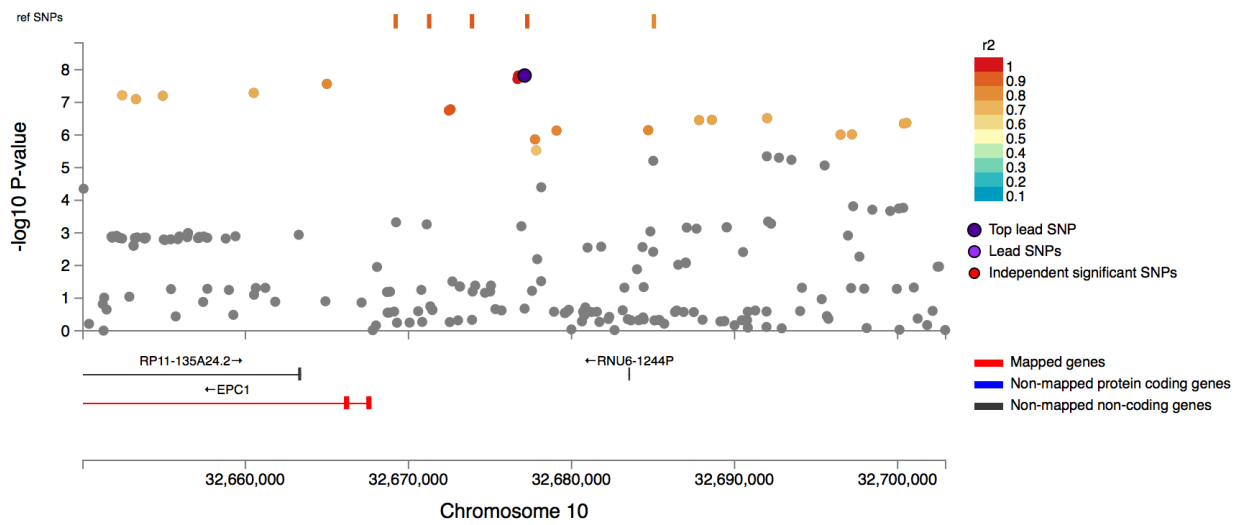



rs67816799

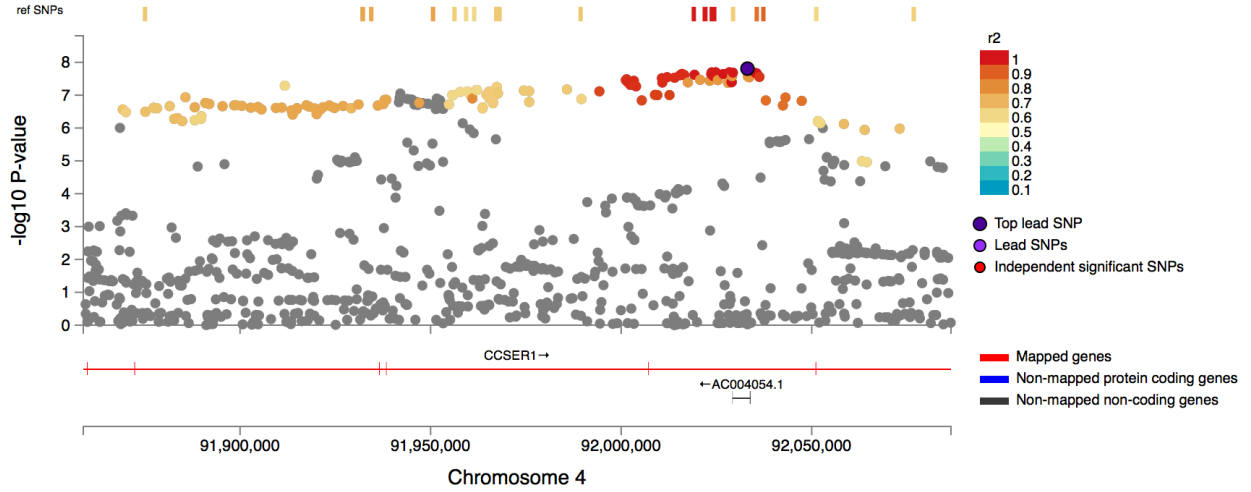

rs10932201

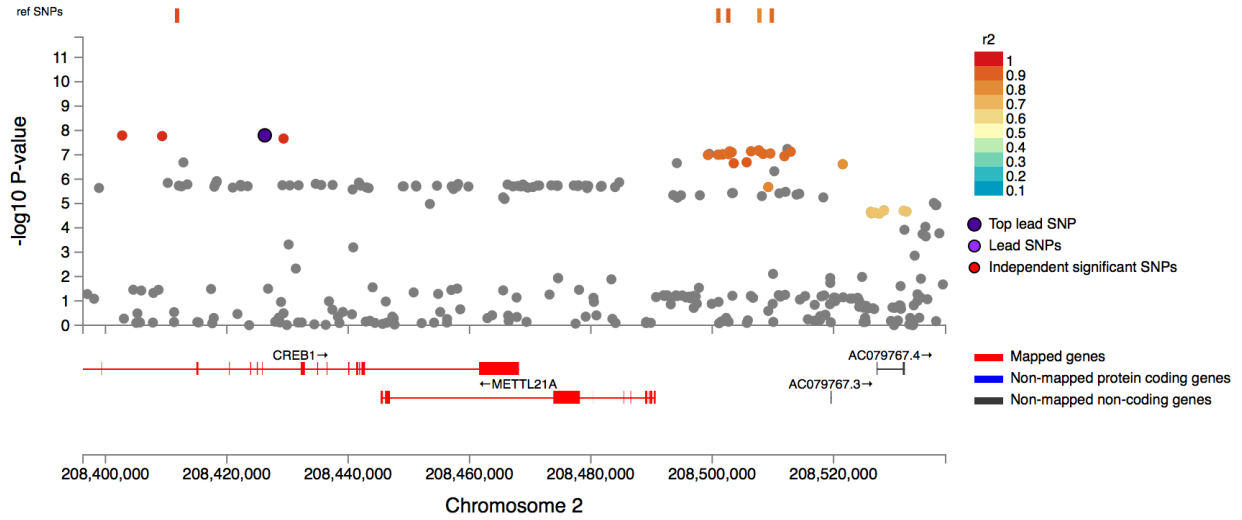

rs526904

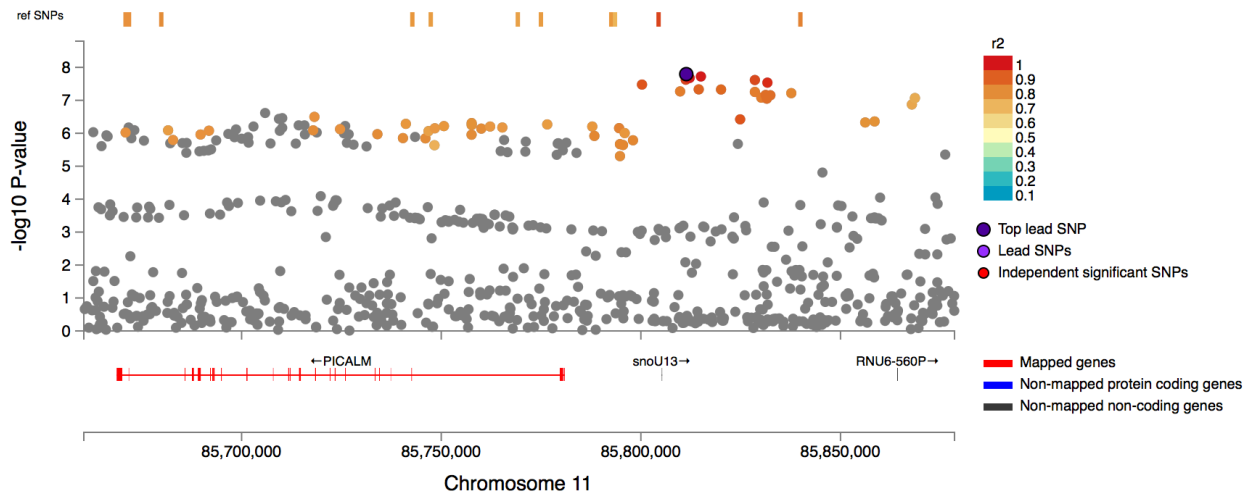

rs6548147

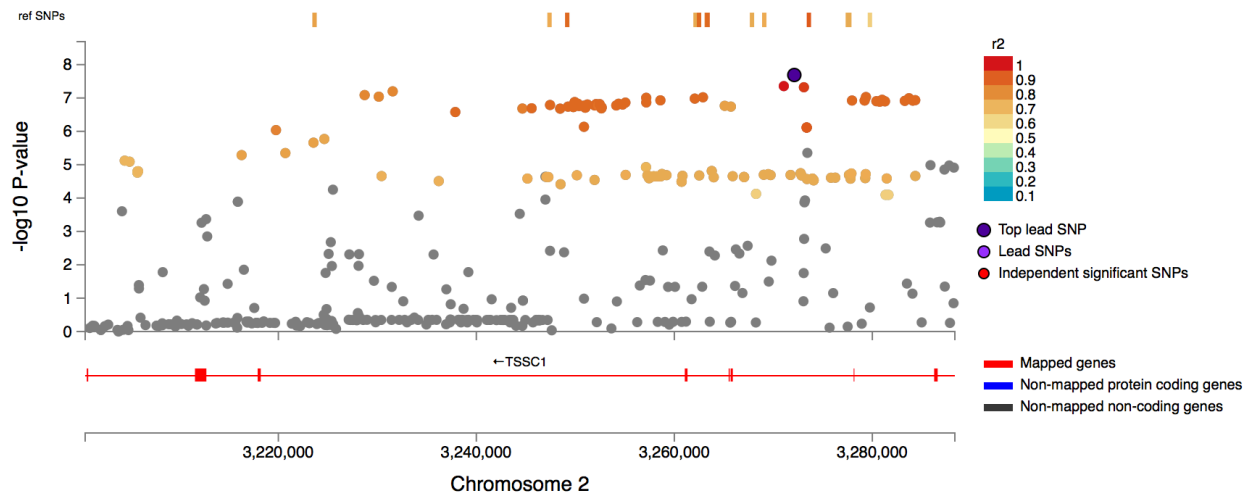

rs10877461

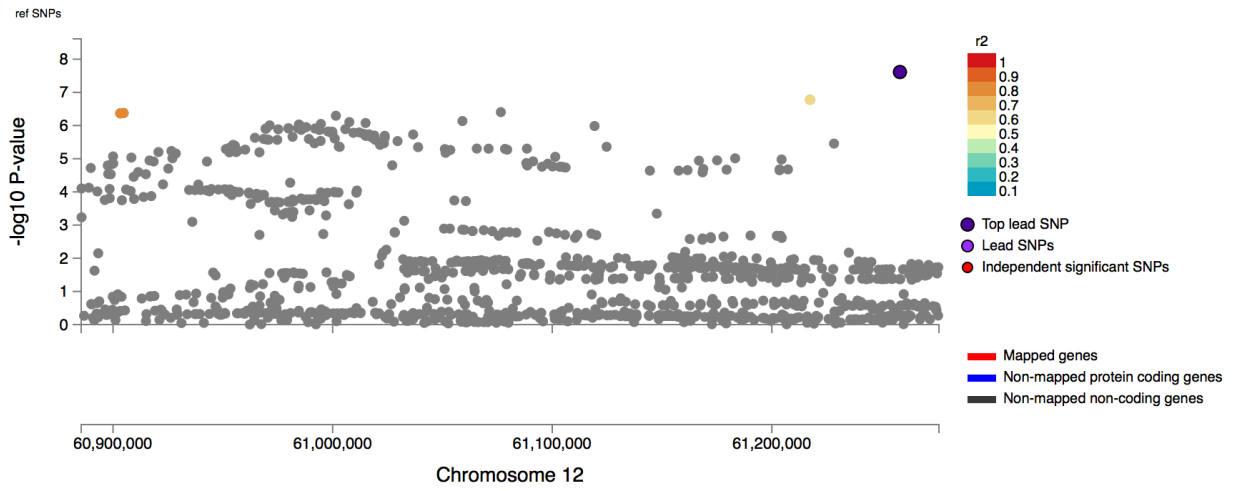

rs11996434

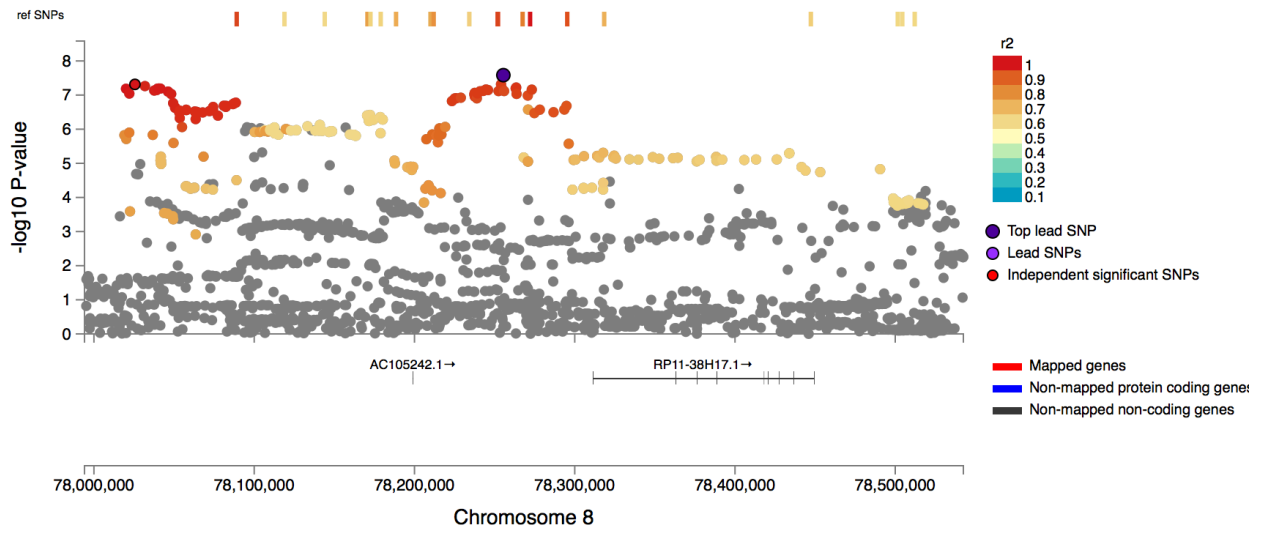

### rs10885458

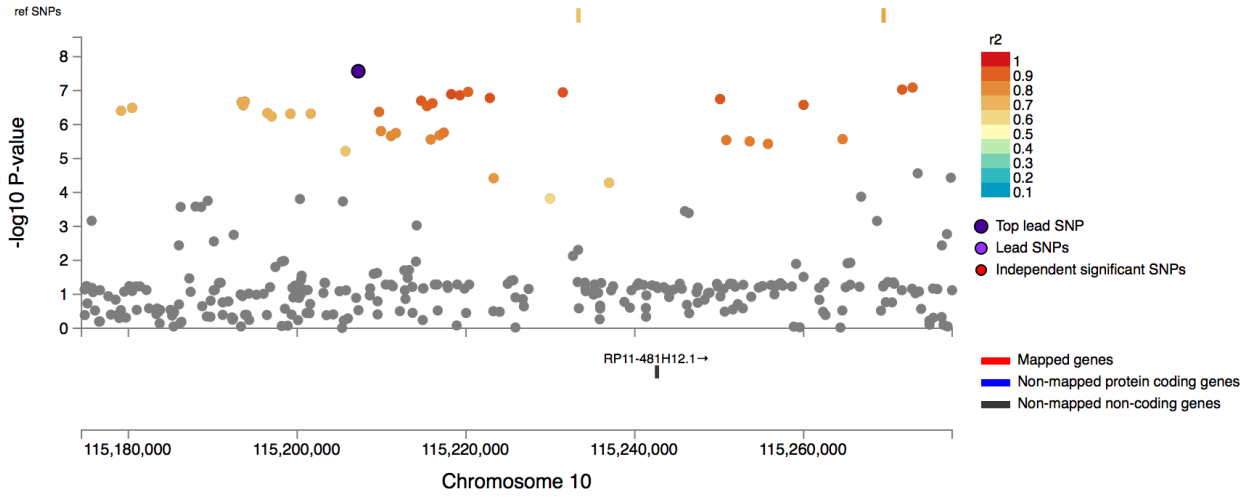

### rs1996148

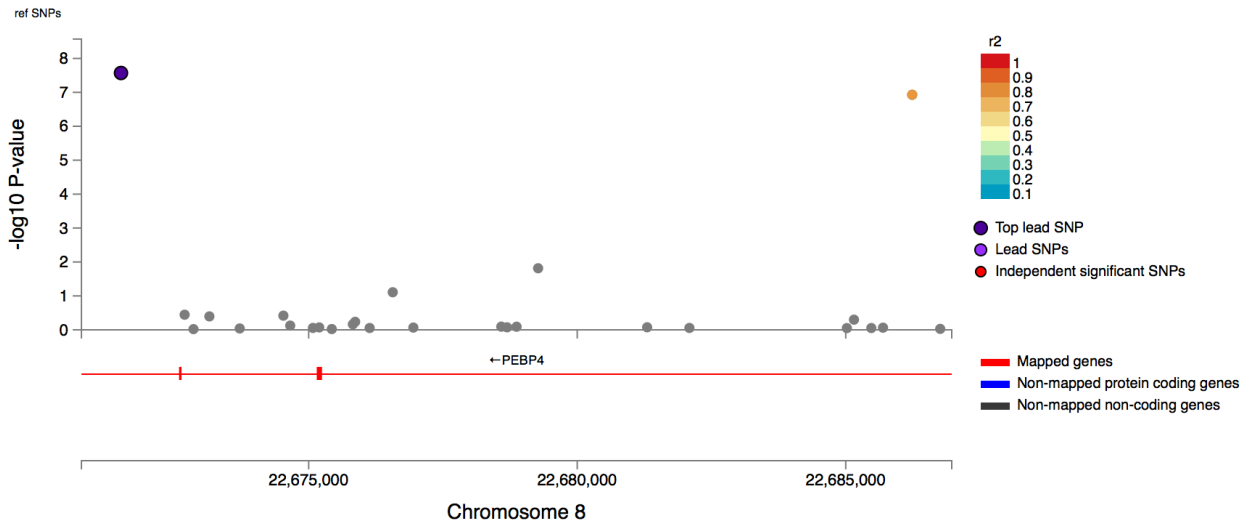

rs191373913

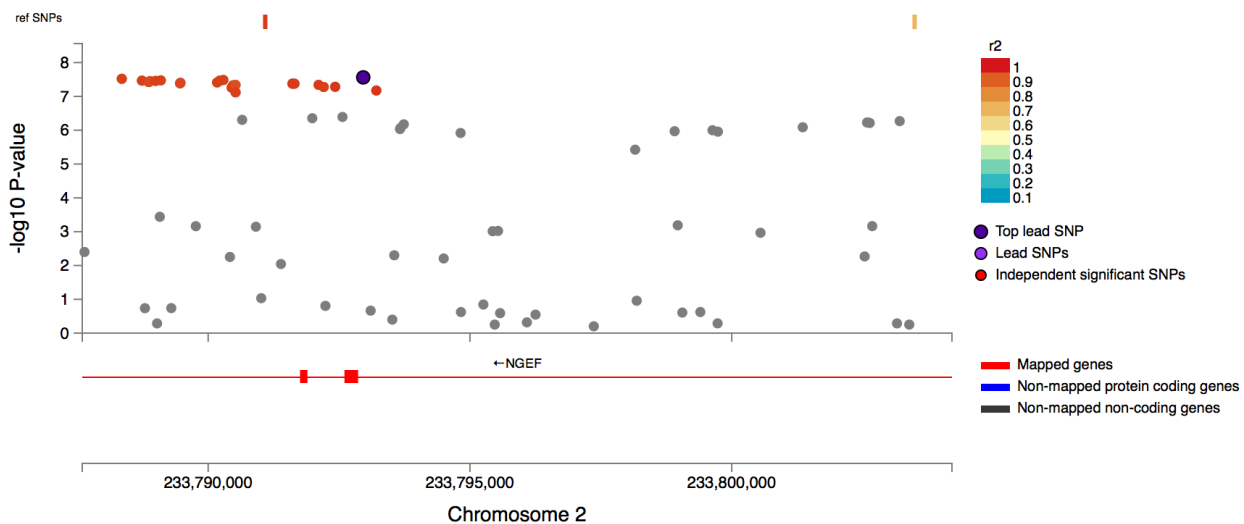

rs12056186

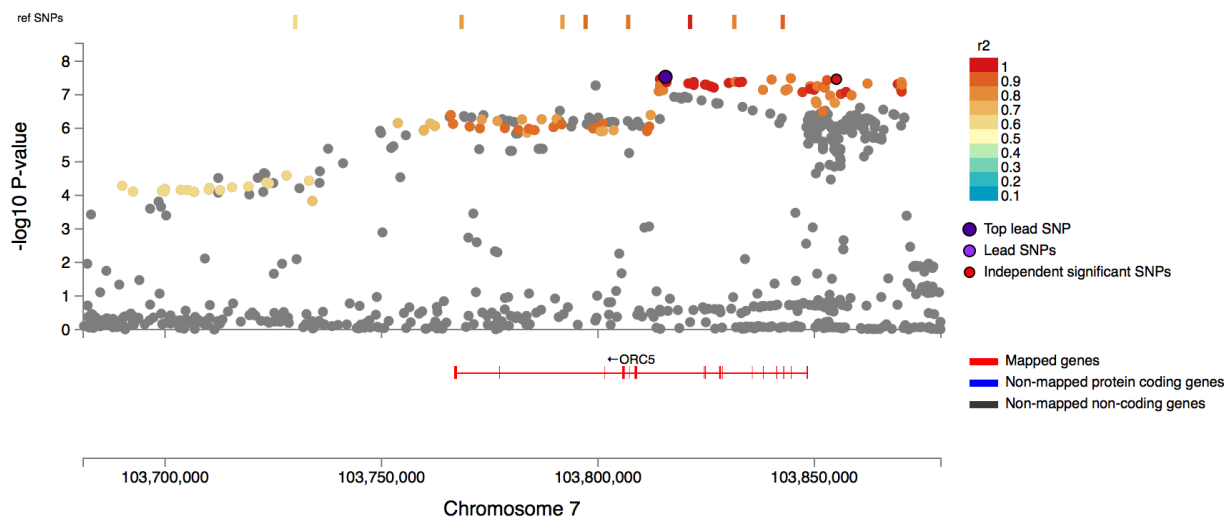

rs7856850

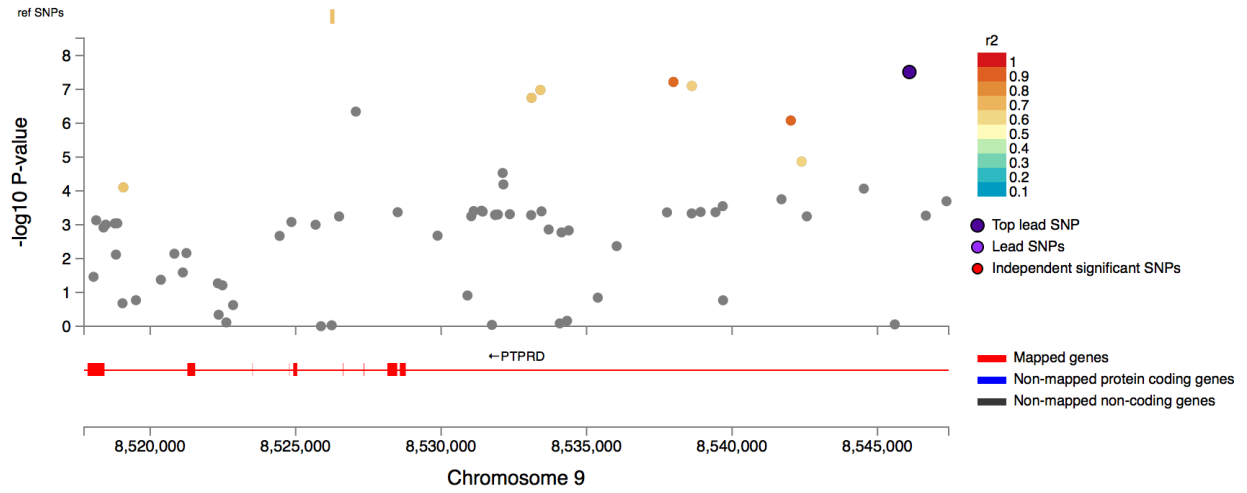

rs13197257

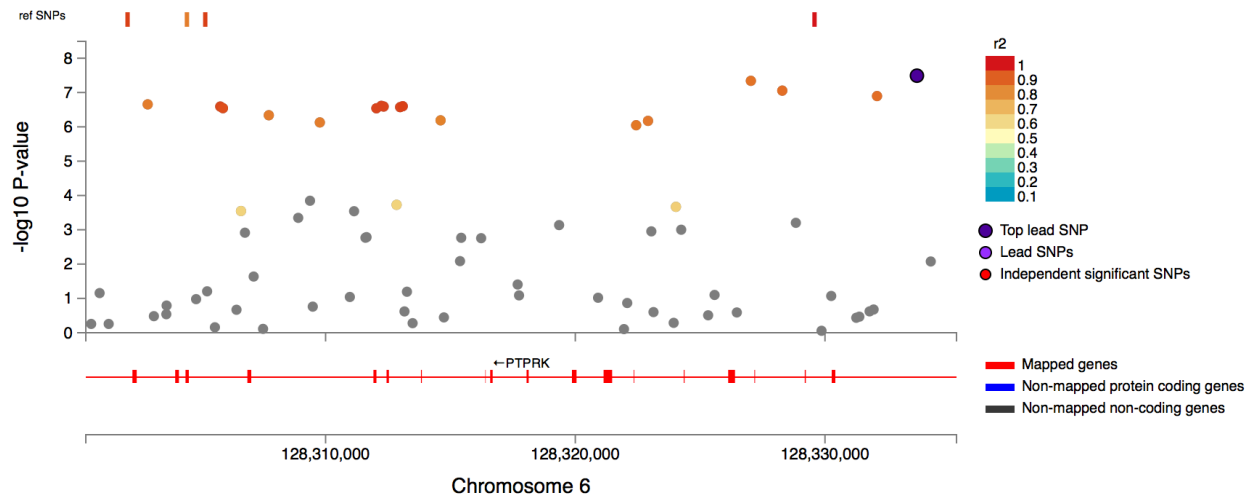

rs10497355

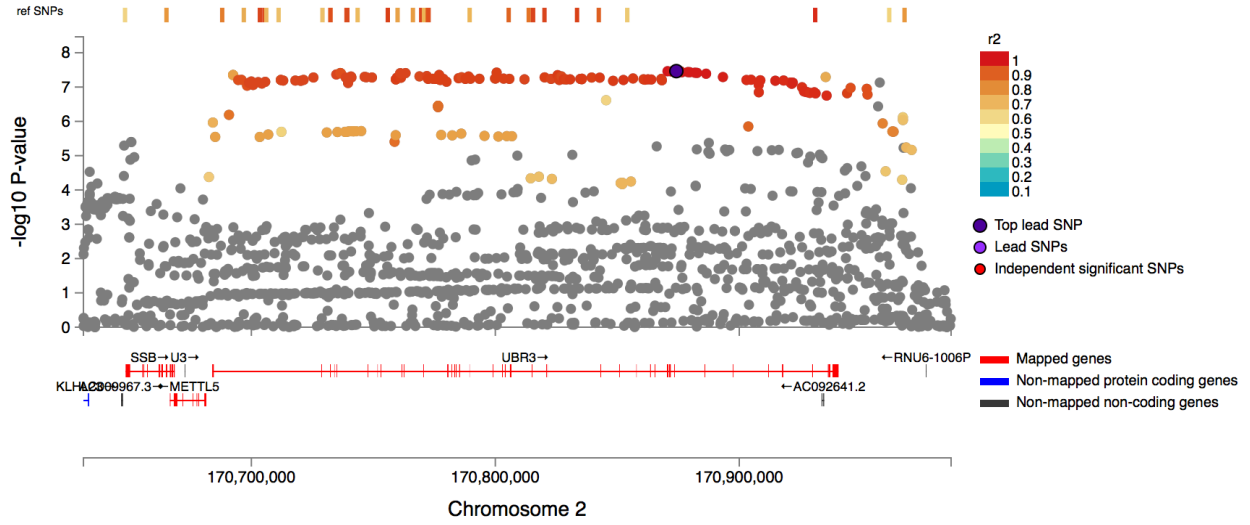

rs11692449

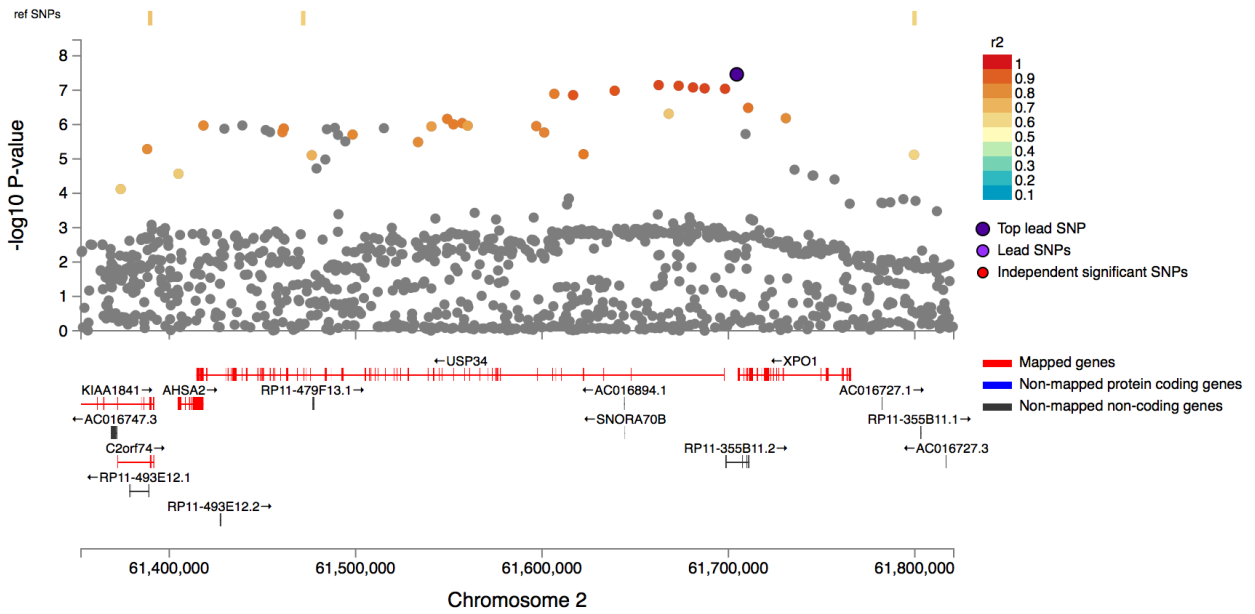

rs4704043

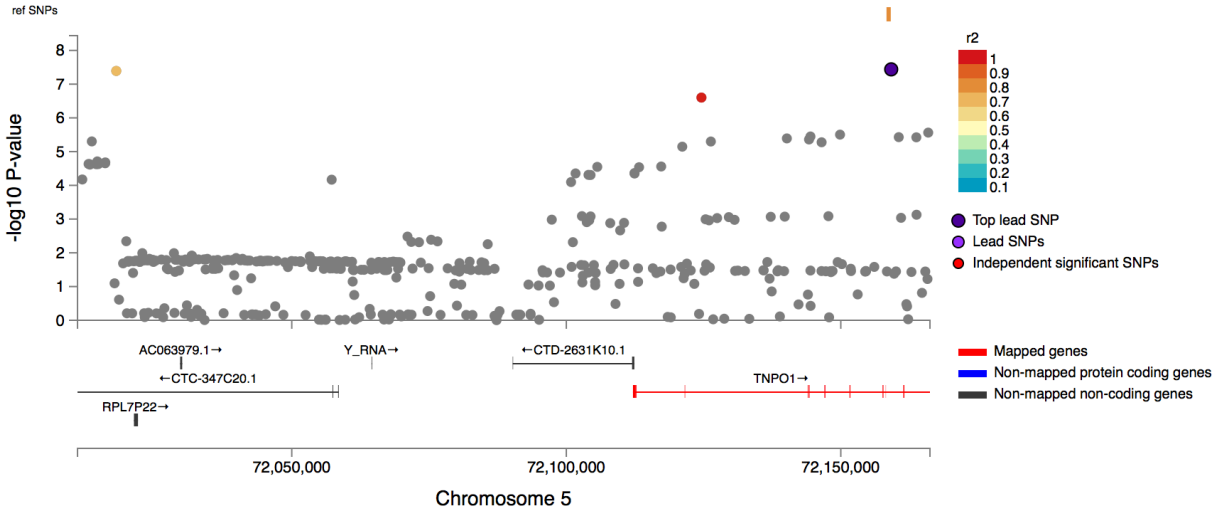

rs43182

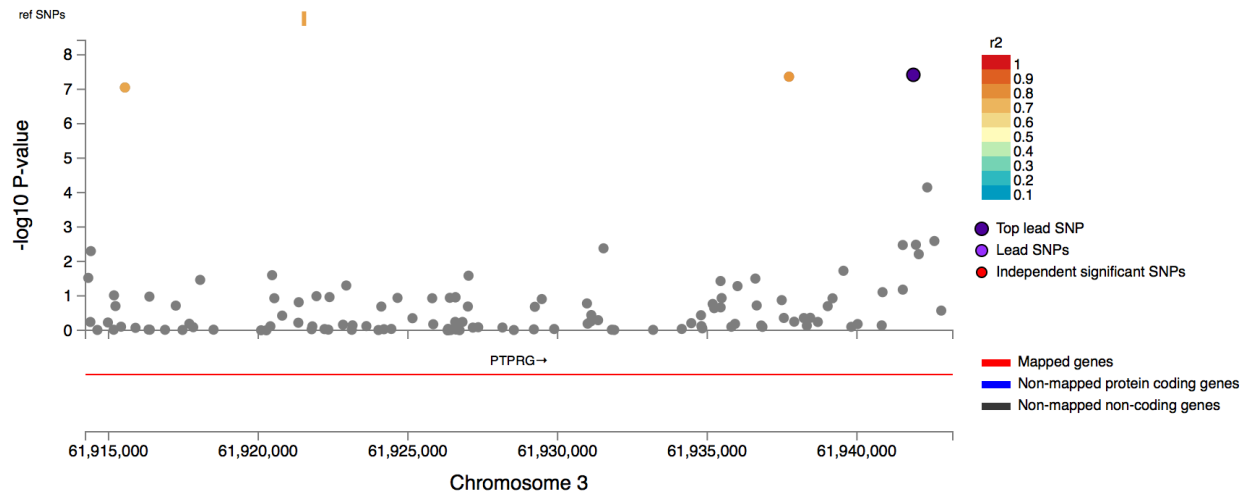



rs62014217

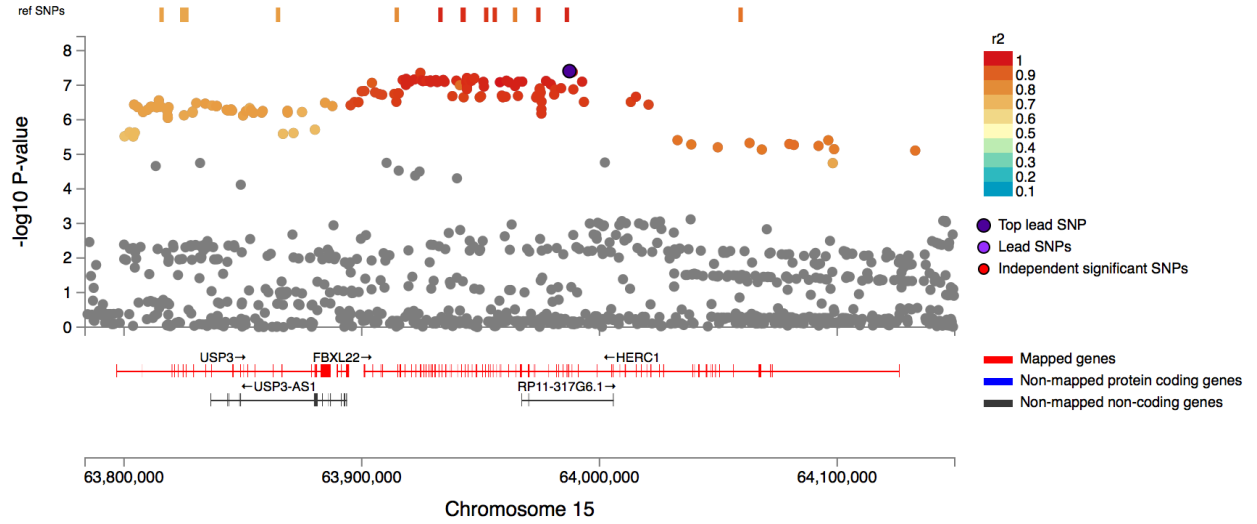

rs476141

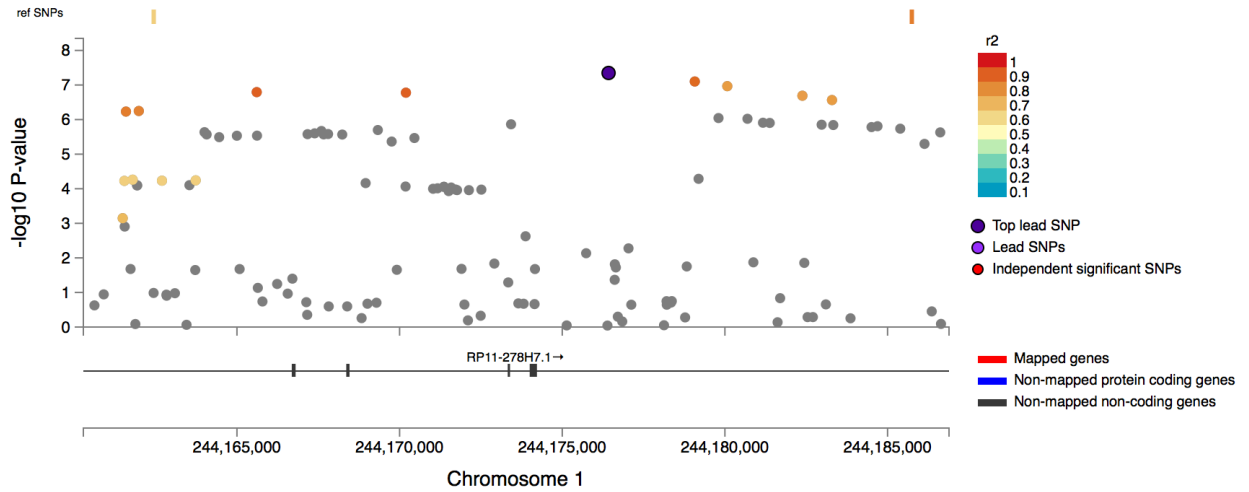

rs2849543

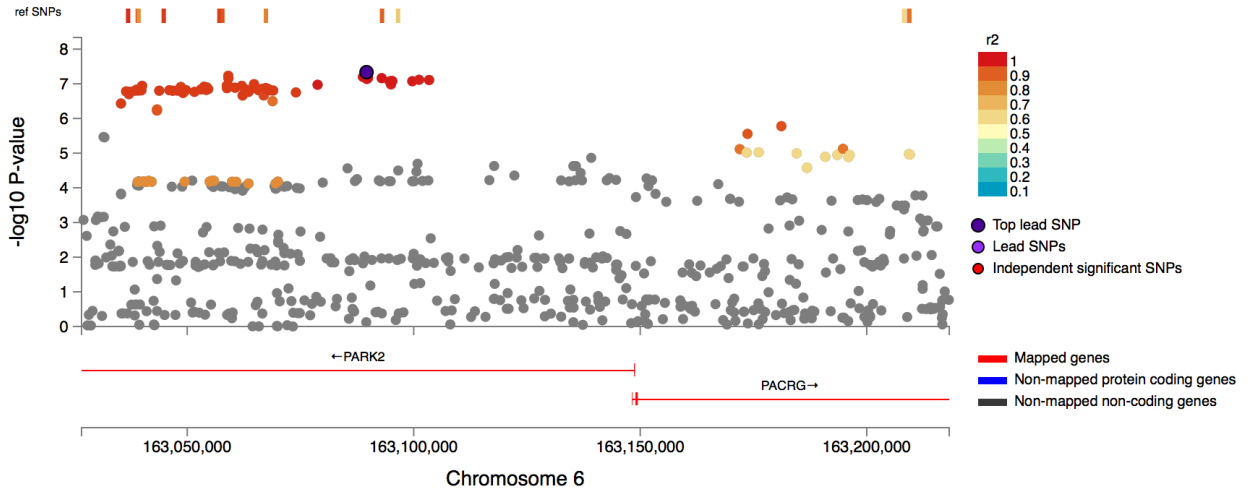

rs571760466

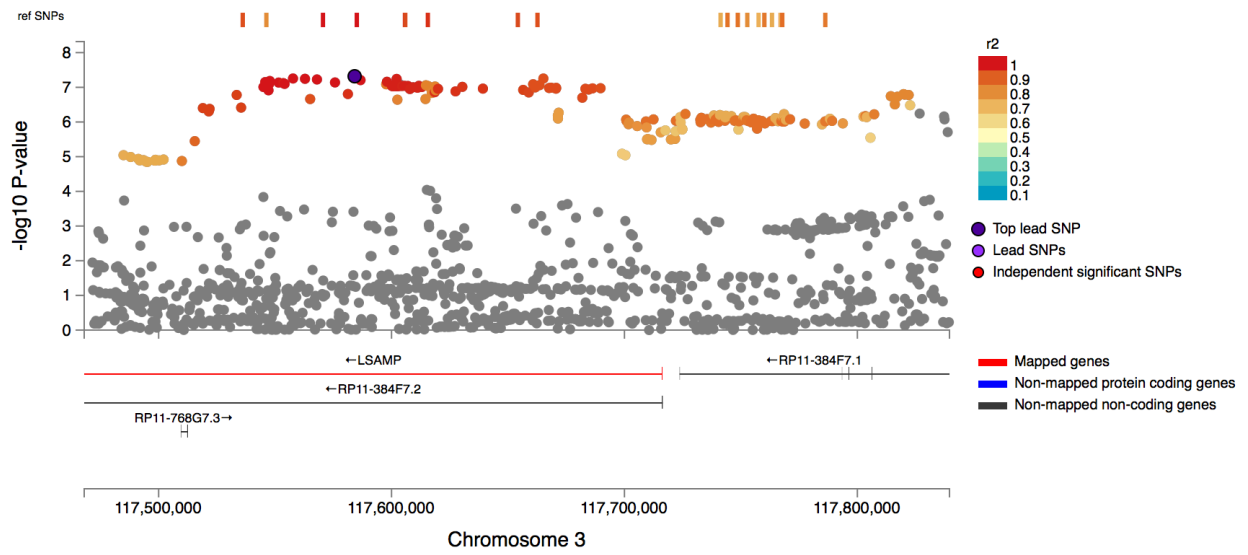

Supplement: Supplementary file [file media-3.pdf]
